# Supplementary material for: Isotretinoin exposure during pregnancy: a population-based study in The Netherlands
Source: PubMed Central journal article supplement — BMJ Open. 2014 Nov 12;4(11):e005602. doi: 10.1136/bmjopen-2014-005602 (PMC4244495; doi:10.1136/bmjopen-2014-005602), 2014-11-12
Supplement: bmjopen-2014-005602.draft_revisions.pdf [file bmjopen-2014-005602.draft_revisions.pdf]

# BMJ Open

## Isotretinoin exposure during pregnancy: a population-based study in the Netherlands

|                                 |                                                                                                                                                                                                                                                                                                                                                                                                                                                                                                                                                                                               |
|---------------------------------|-----------------------------------------------------------------------------------------------------------------------------------------------------------------------------------------------------------------------------------------------------------------------------------------------------------------------------------------------------------------------------------------------------------------------------------------------------------------------------------------------------------------------------------------------------------------------------------------------|
| Journal:                        | <i>BMJ Open</i>                                                                                                                                                                                                                                                                                                                                                                                                                                                                                                                                                                               |
| Manuscript ID:                  | bmjopen-2014-005602                                                                                                                                                                                                                                                                                                                                                                                                                                                                                                                                                                           |
| Article Type:                   | Research                                                                                                                                                                                                                                                                                                                                                                                                                                                                                                                                                                                      |
| Date Submitted by the Author:   | 30-Apr-2014                                                                                                                                                                                                                                                                                                                                                                                                                                                                                                                                                                                   |
| Complete List of Authors:       | Zomerdijk, Ingeborg; Erasmus University Medical Center, Medical Informatics<br>Ruiten, Rikje; Groene Hart Hospital, Internal Medicine; Erasmus University Medical Center, Epidemiology<br>Houweling, Leanne; PHARMO Institute for Drug Outcomes Research, Herings, Ron; PHARMO Institute for Drug Outcomes Research, Sturkenboom, Miriam; Erasmus University Medical Center, Medical Informatics<br>Straus, Sabine; Erasmus University Medical Center, Medical Informatics<br>Stricker, Bruno; Erasmus University Medical Center, Epidemiology; Inspectorate of Health Care, Drug Safety Unit |
| <b>Primary Subject Heading</b>: | Epidemiology                                                                                                                                                                                                                                                                                                                                                                                                                                                                                                                                                                                  |
| Secondary Subject Heading:      | Pharmacology and therapeutics, Dermatology                                                                                                                                                                                                                                                                                                                                                                                                                                                                                                                                                    |
| Keywords:                       | Acne < DERMATOLOGY, EPIDEMIOLOGY, Adverse events < THERAPEUTICS, isotretinoin, pregnancy prevention programme                                                                                                                                                                                                                                                                                                                                                                                                                                                                                 |
|                                 |                                                                                                                                                                                                                                                                                                                                                                                                                                                                                                                                                                                               |

SCHOLARONE™  
Manuscripts

only

1 **Isotretinoin exposure during pregnancy: a population-based study in the Netherlands**

2  
3  
4  
5 Inge M Zomerdijk, Rikje Ruiters, Leanne MA Houweling, Ron MC Herings, Miriam CJM Sturkenboom, Sabine  
6 MJM Straus, Bruno H Stricker

7  
8  
9  
10 Department of Medical Informatics, Erasmus University Medical Center, Dr. Molewaterplein 50, 3015 GE,  
11 Rotterdam, The Netherlands Inge M Zomerdijk

12 PhD candidate

13  
14 Internal medicine, GHZ, Bleulandweg 10, 2803 HH, Gouda, the Netherlands Rikje Ruiters  
15 medical doctor

16  
17 PHARMO Institute for Drug Outcomes Research, Van Deventerlaan 30-40, 3528 AE Utrecht, The Netherlands

18 Leanne MA Houweling

19 business development manager

20  
21 PHARMO Institute for Drug Outcomes Research, Van Deventerlaan 30-40, 3528 AE Utrecht, The Netherlands

22  
23 Ron MC Herings

24 director

25  
26 Department of Medical Informatics, Erasmus University Medical Center, Dr. Molewaterplein 50, 3015 GE,  
27 Rotterdam, The Netherlands Miriam CJM Sturkenboom

28 professor

29  
30 Department of Medical Informatics, Erasmus University Medical Center, Dr. Molewaterplein 50, 3015 GE,  
31 Rotterdam, The Netherlands Sabine MJM Straus

32 associate professor

33  
34 Department of Epidemiology, Erasmus University Medical Center, Dr. Molewaterplein 50, 3015 GE, Rotterdam,  
35 The Netherlands Bruno H Stricker

36  
37 professor

38  
39  
40  
41 Correspondence to: Bruno H Stricker [b.stricker@erasmusmc.nl](mailto:b.stricker@erasmusmc.nl)

42 Department of Epidemiology, Erasmus University Medical Centre, P.O. Box 2040, 3000 CA Rotterdam, The  
43 Netherlands.

44  
45  
46  
47 key words: isotretinoin, pregnancy prevention programme, teratogens, congenital malformations

48  
49  
50 Word count: 3580 words

**ABSTRACT**

**Objective** To estimate isotretinoin exposure in Dutch pregnant women and secondly, to analyse the occurrence of congenital anomalies and fetal death in these isotretinoin exposed pregnancies.

**Design** Population based study

**Setting** the Netherlands

**Participants** a cohort of 203,962 pregnancies with onset between 1 January 1999 and 1 September 2007 consisting of 208,161 fetuses (including multiple births)

**Main outcome measures** Isotretinoin exposure in the 30 days before or during the first, second or third trimester of pregnancy. The occurrence of fetal death and fetus with congenital anomalies. Odds ratios (ORs) with 95% confidence intervals adjusted for maternal age were calculated to estimate the risk of congenital anomalies and fetal death after maternal isotretinoin exposure.

**Results** 45 pregnancies, 2.21 (1.63 to 2.93) per 10,000 pregnancies, were exposed to isotretinoin during pregnancy. Sixty percent of isotretinoin exposed pregnancies started isotretinoin when already pregnant. Among the isotretinoin exposed pregnancies, the proportion of fetal death or congenital anomalies was 6.4% (1.7 to 16.4) and the OR for any congenital anomaly or fetal death was 1.48 (0.46 to 4.77) after adjustment for maternal age. For fetal death, the adjusted OR was 4.00 (1.25 to 12.91) and for congenital anomalies 0.70 (0.10 to 5.06). The risk was highest with exposure to isotretinoin during 30 days before conception or during the first trimester with an adjusted OR of 3.64 (1.41 to 9.39) for any congenital anomaly or fetal death.

**Conclusions** Although a pregnancy prevention programme was already implemented in 1988, we showed that there are still pregnancies exposed to isotretinoin in the Netherlands and moreover, we showed that in these exposed pregnancies there was an elevated risk of congenital anomalies and fetal death.

**ARTICLE SUMMARY****Strengths and limitations of this study**

- This is the first population-based study in the EU on isotretinoin exposure during pregnancy in a large cohort of more than 200,000 pregnancies with virtual complete and detailed drug dispensing and pregnancy outcome data which enabled calculating accurate isotretinoin exposure rates among pregnant women and assessment of pregnancy outcomes.
- Statistical analysis should be interpreted with caution because the absolute number of isotretinoin exposed pregnancies was small.
- Our results might even underestimate the actual isotretinoin exposed pregnancies because pregnancies that ended in a spontaneous or elective abortion before gestational age of 16 weeks were not included in our cohort.
- With this study reasons for failure of the pregnancy prevention programme cannot be identified and only the period 1999 to 2007 has been evaluated. More recent data are necessary to further study the up to date situation of the isotretinoin PPP in the Netherlands.

## INTRODUCTION

Isotretinoin, a vitamin A derivative, is licensed in the European Union (EU) since 1983 and is indicated for systemic treatment of severe acne (such as nodular or conglobate acne or acne at risk of permanent scarring) in patients resistant to adequate courses of standard therapy with systemic antibacterials and topical therapy.<sup>1</sup>

However, the teratogenic potential is a known major adverse effect of treatment with isotretinoin. Animal studies already suggested teratogenic effects in humans and isotretinoin has been contraindicated for use during pregnancy since the very beginning of the marketing authorisation. Despite this contraindication, the first cases of congenital anomalies after isotretinoin use during pregnancy were documented already in 1983.<sup>2</sup> Systemic isotretinoin exposure during the first 10 weeks of pregnancy leads to congenital anomalies in approximately 26% of live births.<sup>3</sup> Isotretinoin embryopathy consists of craniofacial, cardiac, thymic and central nervous system (CNS) defects.<sup>3</sup> Exposure beyond the first 10 weeks of pregnancy can cause developmental delays and other CNS effects in approximately 40% of live births.<sup>4,5</sup> Furthermore, spontaneous abortion was observed in 7-20% of isotretinoin exposed pregnancies and elective termination of pregnancies occurred in more than 50% of exposed pregnancies.<sup>3,4</sup>

Reports of congenital anomalies after isotretinoin use accumulated and consequently, in 1988 the marketing authorisation holder of isotretinoin implemented a Pregnancy Prevention Programme (PPP) world-wide to better prevent pregnancies among systemic isotretinoin users.<sup>6</sup> The PPP included an educational programme for prescribers and patients including material to be used in counselling women about the need to prevent pregnancy while taking isotretinoin. Conditions for prescribing included a negative pregnancy test, the use of reliable contraception and a signed patient consent form.<sup>6</sup> In 2003, a review of isotretinoin by the European Medicine Agency (EMA) resulted in a compulsory European harmonised PPP for all isotretinoin containing products.<sup>1</sup> The elements of the European wide PPP are listed in box 1.

### **Box 1:** Elements of the EU isotretinoin PPP

1. Isotretinoin is contraindicated in pregnant women and should only be initiated in women of reproductive age who understand the teratogenic risk and the need for regular follow-up
2. Use of effective contraceptive measures from four weeks before isotretinoin initiation until four weeks after treatment discontinuation. At least one and preferably two complementary forms of contraception including a barrier method should be used.
3. Pregnancy testing should be done before, during and five weeks after discontinuation of isotretinoin
4. Isotretinoin should only be prescribed by or under the supervision of a physician with experience in the use of systemic retinoids
5. Prescription should be limited to 30 days of treatment and continuation of treatment requires a new prescription.
6. Dispensing of isotretinoin should occur within a maximum of seven days after prescription.
7. Educational programmes for healthcare professionals including prescribers and pharmacists, and patients are in place to inform them about the teratogenic risk and to create awareness of the PPP.

1 The safe use of isotretinoin in women of reproductive age is in the interest of public health because of the  
2 potential risk of spontaneous and elective abortions, and, more importantly, children with major congenital  
3 anomalies require continuous healthcare throughout their life. Although a PPP has been implemented in the  
4 EU, pregnancies during isotretinoin therapy still occur.<sup>7,8</sup> The regulatory authorities of sixteen EU member  
5 states responded in 2009 to a survey that isotretinoin exposed pregnancies have occurred in their country.<sup>9</sup> A  
6 French study between 2003 and 2006 estimated a pregnancy rate from 0.4 to 1.2 per 1000 female isotretinoin  
7 users within reproductive age.<sup>8</sup> Studies in the Netherlands observed that only 52% to 59% of the female  
8 isotretinoin users of reproductive age used concomitant hormonal contraceptives, which was higher than the  
9 39%-46% observed in the general female population of similar age, but lower than anticipated.<sup>10,11</sup> Although  
10 these studies show limited compliance with the isotretinoin PPP, it is not known whether isotretinoin exposure  
11 also occurs during pregnancy and what the outcome of these pregnancies is. Therefore, the objective of our  
12 study was to estimate isotretinoin exposure in Dutch pregnant women and secondly, to analyse the occurrence  
13 of congenital anomalies and fetal death in these isotretinoin exposed pregnancies.  
14  
15  
16  
17  
18  
19  
20  
21  
22  
23  
24  
25

## 26 27 **METHODS**

### 28 29 **Data sources**

30 For this population based study a cohort of 203,962 pregnancies consisting of 208,161 fetuses was constructed  
31 using a linkage between the PHARMO Database Network and the Netherlands Perinatal Registry (PRN). The  
32 PHARMO Database Network is a dynamic population-based cohort including, amongst other information, drug-  
33 dispensing records from community pharmacies for more than 3 million individuals in the Netherlands  
34 (approximately 20% of the Dutch population) that are collected since 1986.<sup>12</sup> The drug dispensing data contain  
35 the following information per prescription: the Anatomical Therapeutic Chemical (ATC) classification of the  
36 drug, dispensing date, regimen, quantity dispensed and estimated length of duration of use.<sup>13</sup> The PRN is a  
37 nationwide registry that contains linked and validated data from four databases: the national obstetric  
38 database for midwives (LVR-1), the national obstetric database for gynaecologists (LVR-2), the national  
39 obstetric database for general practitioners (LVR-h) and the national neonatal/paediatric database (LNR).<sup>14</sup> The  
40 registry contains information about care before, during, and after delivery as well as maternal and neonatal  
41 characteristics and outcome of 95% of 180,000 pregnancies annually in the Netherlands with a gestational age  
42 of at least 16 weeks. The PRN includes information on congenital anomalies detected during pregnancy, at  
43 birth or within the first year after birth. The probabilistic linking method between PHARMO and PRN has been  
44  
45  
46  
47  
48  
49  
50  
51  
52  
53  
54  
55  
56  
57  
58  
59  
60

1 described in detail elsewhere but was generally based on the birth date of the mother and fetus and their  
2 postal zip codes.<sup>15</sup> To be included in the cohort the mother should be registered in the community pharmacy  
3 database of PHARMO during the whole pregnancy. The start of pregnancy was based on the last menstrual  
4 period or ultrasound, as recorded in the PRN, and was truncated to full weeks.  
5  
6  
7  
8

### 9 **Isotretinoin dispensings**

10 All dispensings for systemic (oral) isotretinoin (ATC D10BA01) filled in community pharmacies by women  
11 included in our cohort within the 12-months period before or during pregnancy were extracted from the  
12 PHARMO Database Network. Considering a daily dosage of 0.5 mg-1mg per kilogram daily,<sup>1</sup> isotretinoin  
13 prescriptions dispensed on the same day were pooled (e.g. the prescriptions of a 10 mg and 20 mg tablet to  
14 result in a daily dosage of 30mg were pooled). The length of all isotretinoin dispensings was calculated by  
15 dividing the total number of prescribed units by the number of units (doses) to be taken per day. In case the  
16 pooled dispensings had different lengths - in case every other day different strengths should be taken - the  
17 longest duration was taken (i.e. one day 20 mg tablet, the other day 20 mg and 10 mg tablet). To assess  
18 compliance with the PPP, we calculated the proportion of dispensings that exceeded 30 days, which is the  
19 maximum length according to the EU PPP.  
20  
21  
22  
23  
24  
25  
26  
27  
28  
29  
30  
31  
32

### 33 **Drug exposure**

34 For all pregnancies (n=203,962) > 16 weeks of gestational age included in the cohort, isotretinoin exposure  
35 before and during pregnancy was determined based on isotretinoin dispensing data (ATC D10BA01) filled by  
36 the mother during the 12-months period before and during pregnancy. Exposure in person time (days) was  
37 calculated by dividing the total number of prescribed units by the number of prescribed units per day.  
38 Isotretinoin exposure periods were defined considering a possible overlapping period but gaps between two  
39 isotretinoin dispensings were not permitted in one period. Using the start and end date of the isotretinoin , the  
40 number of days exposed during pregnancy was estimated for the following exposure windows: 30 days before  
41 conception, first 90 days of gestation (first trimester), day 90-179 of gestation (second trimester) and day 180 –  
42 delivery (third trimester). In addition, the entire period 30 days before pregnancy until delivery as well as the  
43 period from 30 days before till the end of the first trimester were analysed separately.  
44  
45  
46  
47  
48  
49  
50  
51  
52  
53  
54  
55  
56  
57  
58  
59  
60

## Pregnancy outcomes

For each fetus (n=208,161), we determined whether congenital anomalies or fetal death was reported. Fetal death was defined as death before complete expulsion or extraction from the mother.<sup>16</sup> Congenital anomalies were categorised into nine sub-groups: abdominal wall and skin disorders; cardiovascular defects; defects in the digestive system; defects in the nervous system; musculoskeletal defects; respiratory defects; urogenital defects; multiple, syndrome or chromosomal anomalies; or other congenital malformations. Description of the classification system for congenital anomalies used in our study are presented in the supplementary information Table S1. As we were interested in those congenital anomalies potentially induced by maternal drug exposure, chromosomal anomalies were excluded.

## Analysis

The dispensing rate of isotretinoin among the pregnant women included in our study was calculated and stratified per exposure period. Exposure to isotretinoin per 10,000 pregnancies was calculated for the aforementioned exposure periods including their 95% confidence intervals (95% CIs). We used multiple logistic regression models to calculate odds ratios (ORs) and 95% CIs to estimate associations between congenital anomalies, fetal death and maternal isotretinoin exposure. We adjusted for maternal age at conception (<20, 20-24, 25-29, 30-34, ≥35), and if possible also for calendar time (year of conception) and gender of the infant. Analyses for specific congenital anomalies were performed when > 3 cases were observed. The t-test or Fisher exact test was used to derive p-values when comparing continuous or categorical variables between study groups. Statistical significance was assumed for two-sided p-values <0.05. Statistical analyses were performed using SAS version 9.2 (SAS Institute, Cary, North Carolina).

## RESULTS

Between 1 January 1999 and 1 September 2007 in the Netherlands, a total of 203,962 pregnancies corresponding to 208,161 fetuses (including multiple births) were included in our study. The mean maternal age at conception was 30.3 years (SD 4.6) and mean duration of pregnancy was 39 weeks and 3 days (SD 19 days). Demographics for isotretinoin exposed and unexposed pregnancies are presented in table 1.



**Table 1:** Description of the study population

|                                                                | Isotretinoin exposed*       | Isotretinoin unexposed                            | <i>p</i> -value |
|----------------------------------------------------------------|-----------------------------|---------------------------------------------------|-----------------|
| <i>Pregnancies (N=203,962)</i>                                 | 51                          | 203,911                                           |                 |
| Mean ( $\pm$ SD) maternal age at conception in years (95% CI)  | 29.1 (4.9)<br>(27.8 – 30.5) | 30.3 (4.7)<br>(30.3 – 30.3)                       | 0.56            |
| Mean ( $\pm$ SD) gestational age at delivery in weeks (95% CI) | 39 (25 days)<br>(38 – 40)   | 39, 3 days (19 days)<br>(39. 3 days – 39. 3 days) | 0.33            |
| <i>Fetuses (N=208,161)</i>                                     | 53                          | 208,108                                           |                 |
| Gender (boy %)                                                 | 47.2%<br>(33.3 – 61.1)      | 51.5%<br>(51.3 – 51.7)                            | 0.53            |
| <i>Maternal age at conception in years, n, column %.</i>       |                             |                                                   | 0.37            |
| < 20 years of age                                              | 2 (3.8%)                    | 4,063 (2.0%)                                      |                 |
| $\geq$ 20 -25 years of age                                     | 7 (13.2%)                   | 22,144 (10.6%)                                    |                 |
| $\geq$ 25 -30 years of age                                     | 21 (39.6%)                  | 68,366 (32.9%)                                    |                 |
| $\geq$ 30 -35 years of age                                     | 14 (26.4%)                  | 81,581 (39.2%)                                    |                 |
| $\geq$ 35 years of age                                         | 9 (17.0%)                   | 31,951 (15.4%)                                    |                 |
| <i>Gestational age at delivery, n, column %.</i>               |                             |                                                   | 0.64            |
| < 27 weeks                                                     | 1 (1.9%)                    | 2,198 (1.1%)                                      |                 |
| 27 – 30 weeks                                                  | 1 (1.9%)                    | 1,167 (0.6%)                                      |                 |
| 31-33 weeks                                                    | 0 (0.0%)                    | 2,008 (1.0%)                                      |                 |
| 34-36 weeks                                                    | 3 (5.7%)                    | 7,126 (3.4%)                                      |                 |
| 37-39 weeks                                                    | 12 (22.6%)                  | 50,854 (24.4%)                                    |                 |
| >40 weeks                                                      | 36 (67.9%)                  | 144,755 (69.5%)                                   |                 |
| Fetal death or congenital anomalies, n;% (95% CI)              | 5;<br>9.4% (1.3 -17.6)      | 9,041;<br>4.3% (4.3 – 4.4)                        | 0.08            |
| Fetal death, n; % (95% CI)                                     | 3;<br>5.7% (0 – 12.1)       | 3,404;<br>1.6% (1.6 – 1.7).                       | 0.06            |
| Congenital anomalies, n;% (95% CI)                             | 3;<br>5.7% (0 – 12.1)       | 6,246;<br>3.0% (2.93 – 3.07)                      | 0.21            |

\*including 45 isotretinoin exposed pregnancies and 6 pregnancies occurred within 30 days after isotretinoin discontinuation

### Isotretinoin dispensings

A total of 416 isotretinoin dispensings to 130 of the 203,962 women in the 12-months period before or during pregnancy were identified. In 139 of the 416 isotretinoin dispensings (33.4%), the dispensing consisted of > 30 days of isotretinoin use. Figure 1 shows that the percentage of isotretinoin dispensings in the year before or during pregnancy exceeding the maximum duration of 30 days decreased over calendar time from 50% in 2001 to 13% in 2007.

Overall, 45 pregnant women, 2.21 (95% CI 1.63 – 2.93) per 10,000 pregnancies, were exposed to isotretinoin during pregnancy of whom 27 (60%) started isotretinoin treatment while already being pregnant. In 18 pregnancies (40%), the conception occurred during isotretinoin treatment. Six additional pregnancies were identified within one month after isotretinoin discontinuation. In 40 out of 203,962 pregnancies, 1.96 (95% CI

1.42 – 2.64) per 10,000 pregnancies, an isotretinoin prescription was filled during pregnancy. Thirty-two of these 40 pregnant women received isotretinoin more than once during pregnancy. The number of isotretinoin dispensings ranged from 1 to 7, with a median of 2.50. Among the pregnancies exposed to isotretinoin during pregnancy (n=45), the number of exposed days during pregnancy ranged from 3 to 236 days with a median of 63 days. Figure 2 shows that the number of women exposed to isotretinoin during pregnancy was the highest in 2006 with 3.48 exposed pregnancies (95% CI 1.70 – 6.39) per 10,000 pregnancies.

### Pregnancy outcomes

Independent of isotretinoin exposure, for 9,046 of the 208,161 fetuses (4.35%, 95% CI 4.26- 4.43) fetal death or a congenital anomaly excluding chromosomal anomalies was reported in the PRN. The proportion of fetal death was 1.64% (95% CI 1.58 – 1.69) and 3.00% (95% CI 2.93 – 3.08) for congenital anomalies.

The 45 pregnancies exposed to isotretinoin during pregnancy corresponded to 47 fetuses. Among these 47 fetuses, three were identified fetal deaths or had congenital anomalies (6.38%, 95%CI 1.65 – 16.39). The proportion of fetal death (n=3) and congenital anomalies (n=1) was 6.38% (95%CI 1.65 – 16.39) and 2.13% (95% CI 0.11 – 10.04) respectively. Considering also the six pregnancies that occurred within one month after isotretinoin discontinuation, a total of five out of 53 fetus (9.43%, 95CI 3.54 – 19.68) were identified as fetal death (n=3) or had a congenital anomaly (n=3). The isotretinoin exposed fetal deaths and infants born with congenital anomalies in different exposure period are presented in table 2.

**Table 2:** Isotretinoin exposed pregnancies and fetuses per exposure period

| Isotretinoin exposure period*                                        | Pregnancies (N=203,962) | Exposed pregnancies / 10,000 pregnancies (N, 95% CI) | Median number of days exposed per pregnancy (range) | Fetuses (N=208,161) | Fetuses with congenital anomalies or fetal death (N=53)** |
|----------------------------------------------------------------------|-------------------------|------------------------------------------------------|-----------------------------------------------------|---------------------|-----------------------------------------------------------|
| 30 days before conception (30 days period)                           | 23                      | 1.13 (0.73 – 1.67)                                   | 24 (range 3 – 30)                                   | 23                  | 5;<br>21.74% (8.43 – 41.80)                               |
| 1 <sup>st</sup> trimester (90 days period)                           | 28                      | 1.37 (0.93 – 1.96)                                   | 31 (range 3 – 88)                                   | 28                  | 3;<br>10.71% (2.80 – 2.65)                                |
| 2 <sup>nd</sup> trimester (90 days period)                           | 25                      | 1.23 (0.81 – 1.78)                                   | 57 (range 1 – 90)                                   | 26                  | 2;<br>7.69% (1.31 – 23.16)                                |
| 3 <sup>rd</sup> trimester (90-103 days period)                       | 26                      | 1.28 (0.85 – 1.84)                                   | 62 (range 1 – 103)                                  | 28                  | 2;<br>7.14% (1.22 – 21.65)                                |
| During pregnancy (270 days period)                                   | 45                      | 2.21 (1.63 – 2.93)                                   | 63 (range 3 – 236)                                  | 47                  | 3;<br>6.38% (1.65 – 16.39)                                |
| 30 days before or during pregnancy (300 days period)                 | 51                      | 2.50 (1.88 – 3.26)                                   | 63 (range 7 – 236)                                  | 53                  | 5;<br>9.43% (3.54 – 19.68)                                |
| 30 days before or during 1 <sup>st</sup> trimester (120 days period) | 35                      | 1.72 (1.24 – 2.36)                                   | 32 (range 7 – 114)                                  | 35                  | 5;<br>14.29% (5.43 – 28.86)                               |

CI=Confidence interval.

\*Categories are not mutually exclusive but indicate the number of pregnancies exposed to isotretinoin during that period

\*\*51 pregnancies corresponded to 53 infants including two multiple births

1 For isotretinoin exposure during pregnancy, the odds ratio (OR) for any congenital anomaly or fetal death was  
2  
3 1.48 (95% CI 0.46 – 4.77) after adjustment for maternal age (see table 3). Considering the same exposure  
4  
5 window, for fetal death, the adjusted OR was 4.00 (95% CI 1.25 – 12.91) and for congenital anomalies 0.70  
6  
7 (95% CI 0.10 – 5.06). The number of cases were too low to allow for adjustments in addition to maternal age.  
8  
9 Adding the 30 days before conception to the exposure window (exposure 30 days before or during pregnancy),  
10  
11 the adjusted OR for any congenital anomaly or fetal death was 2.28 (95% CI 0.91 – 5.72). A significantly  
12  
13 increased OR of 3.64 (95% CI 1.41 – 9.39) was observed for any congenital anomaly or fetal death and  
14  
15 isotretinoin exposure within 30 days before or first trimester of pregnancy. The ORs for fetal death were  
16  
17 significantly increased in both these periods.  
18  
19  
20  
21  
22  
23  
24  
25  
26  
27  
28  
29  
30  
31  
32  
33  
34  
35  
36  
37  
38  
39  
40  
41  
42  
43  
44  
45  
46  
47  
48  
49  
50  
51  
52  
53  
54  
55  
56  
57  
58  
59  
60

Table 3: Odds ratios for congenital anomalies and fetal death and isotretinoin exposure during pregnancy

| Congenital anomalies                  | Unexposed fetuses (N=208,106) | Isotretinoin exposed fetuses |                        |                        |                                           |                        |                        |                                                    |                        |                        |
|---------------------------------------|-------------------------------|------------------------------|------------------------|------------------------|-------------------------------------------|------------------------|------------------------|----------------------------------------------------|------------------------|------------------------|
|                                       |                               | During pregnancy (N=47)      |                        |                        | 30 days before or during pregnancy (N=53) |                        |                        | 30 days before or 1 <sup>st</sup> trimester (N=35) |                        |                        |
|                                       |                               | N                            | OR                     | Adjusted OR*           | N                                         | OR                     | Adjusted OR*           | N                                                  | OR                     | Adjusted OR*           |
| Any congenital anomaly or fetal death | 9,041                         | 3                            | 1.51<br>(0.47 – 4.84)  | 1.48<br>(0.46 – 4.77)  | 5                                         | 2.30<br>(0.91 – 5.77)  | 2.28<br>(0.91 – 5.72)  | 3                                                  | 3.68<br>(1.43 – 9.48)  | 3.64<br>(1.41 – 9.39)  |
| Fetal death                           | 3,404                         | 3                            | 4.10<br>(1.27 – 13.22) | 4.00<br>(1.25 – 12.91) | 3                                         | 3.61<br>(1.13 – 11.58) | 3.57<br>(1.11 – 11.47) | 3                                                  | 5.64<br>(1.73 – 18.42) | 5.55<br>(1.70 – 18.19) |
| Any congenital anomaly                | 6,246                         | 1                            | 0.70<br>(0.10 – 5.09)  | 0.70<br>(0.10 – 5.06)  | 3                                         | 1.94<br>(0.61 – 6.22)  | 1.93<br>(0.60 – 6.18)  | 1                                                  | 3.03<br>(0.93 – 9.90)  | 3.02<br>(0.92 – 9.86)  |

\*maternal age in categories (<20, 20-24, 25-29, 30-34, ≥35)

## Description of cases

The pregnancies exposed to isotretinoin in the 30 days before or during pregnancy resulted in five cases of fetal death or congenital anomalies. The year of conception of these cases was 2002 (n=2), 2003 (n=2) and 2005 (n=1). Three of the five cases were exposed to isotretinoin during pregnancy and two cases were only exposed to isotretinoin in the 30 days before conception because conception occurred within 30 days after isotretinoin discontinuation and no new isotretinoin prescriptions were filled afterwards. All three pregnancies exposed to isotretinoin during pregnancy started while the mother was already using isotretinoin, and all three cases ended in fetal death. One pregnancy was exposed to isotretinoin 29 days following conception and no new isotretinoin prescriptions were filled after conception. The pregnancy ended in fetal death after 19 weeks. In the second pregnancy two isotretinoin prescriptions were filled during pregnancy resulting in a total of 166 days of isotretinoin exposure during pregnancy (19 days in the first trimester and 79 and 68 days in the second and third trimester of pregnancy, respectively). After 38 weeks, the pregnancy resulted in fetal death and cardiovascular anomalies (not further specified). In the third pregnancy, four isotretinoin prescriptions were filled during pregnancy resulting in a total of 163 days of isotretinoin exposure during pregnancy (73 in first, 51 and 39 in second and third trimester respectively). After 35 weeks the pregnancy ended in fetal death. The two remaining pregnancies were only exposed to isotretinoin in the 30 days before conception. Both fetus were born with gestational age of 39 or 40 weeks and had congenital anomalies; one had a neural tube defect and for the other the anomaly was not further specified.

## DISCUSSION

This study showed that 2 per 10,000 pregnancies were exposed to isotretinoin during pregnancy despite the fact that a PPP is implemented to prevent isotretinoin use during pregnancy. In the majority of isotretinoin exposed pregnancies, women started isotretinoin when already pregnant. The risk of congenital anomalies or fetal deaths was increased in pregnancies that were exposed to isotretinoin during the 30 days prior or during the first trimester of pregnancy while the risk of fetal death was increased during all analysed time windows.

That there are still women who are using isotretinoin during pregnancy despite the implementation of the PPP is of major concern. Since the majority of the isotretinoin exposed women were already pregnant at the time of first isotretinoin prescription, it seems that pregnancy in isotretinoin users was not always excluded before drug dispensing (box 1). Furthermore, women of reproductive age treated with isotretinoin might not always

1 have used effective contraceptive measures. Our study showed that compliance with the maximum length of  
2 prescription of 30 days between 1999 and 2007 was limited since one third of isotretinoin dispensings  
3 exceeded 30 days. This decreased to 13% in 2007 which suggests a higher awareness. Based on this study, no  
4 conclusions can be drawn as to which elements of the PPP fail but it is obvious that the PPP is not completely  
5 effective. These findings are in line with previous Dutch studies that found that concomitant use of hormonal  
6 contraceptives in isotretinoin using women of reproductive age is limited to 52% - 59%.<sup>10,11</sup> Limited compliance  
7 with the PPP in the Netherlands was also observed in a survey among Dutch pharmacists which indicated that  
8 in 2007 and 2011, 44% and 49% of pharmacists respectively checked the use of contraception at every  
9 isotretinoin dispensing.<sup>17</sup> The percentage of pharmacists that asked for negative pregnancy tests was stable  
10 with 15% and 16% respectively and is in line with the results of our study which demonstrate that it seems that  
11 pregnancy is not always excluded before initiating isotretinoin. These findings suggest an ongoing need to  
12 educate healthcare professionals and patients on the fetal risks of isotretinoin and the PPP, especially since  
13 isotretinoin is used in young women of reproductive age. If that does not work, more strict measures might  
14 have to be considered.

15  
16  
17  
18  
19  
20  
21  
22  
23  
24  
25  
26  
27  
28  
29 In the United States (US), the most recent isotretinoin PPP, called iPLEDGE, has been implemented since 2006  
30 and is stricter than the EU PPP. iPLEDGE is an internet-based system that requires registration of all  
31 stakeholders with monthly updates on prescription, pregnancy tests, contraceptive use, acknowledgement of  
32 risks.<sup>18</sup> The pregnancy rate among isotretinoin users in the US with the iPLEDGE PPP was estimated 2.7 per  
33 1000 treatment courses and did not change compared to the previous PPP called SMART (System to Manage  
34 Accutane Related Teratogenicity) while only small improvements in compliance with contraceptive measures  
35 were observed.<sup>18,19</sup> Further restrictive measures as in iPLEDGE do not seem to improve the results and may  
36 contribute to the potential inefficiencies of the healthcare system.

37  
38  
39  
40  
41  
42  
43  
44  
45  
46 The proportion of congenital anomalies or fetal death after isotretinoin exposure during pregnancy in our study  
47 was 6.4%. Comparable proportions were observed in a German study which also found that 76% of isotretinoin  
48 exposed pregnancies ended in an elective pregnancy termination.<sup>7</sup> No information on elective pregnancy  
49 termination was available in our study but the potentially high proportion of elective pregnancy termination  
50 may explain the lower proportions of congenital anomalies after isotretinoin exposure during pregnancy  
51 observed in our study (2.1%) as compared to earlier studies that reported 26%-28%.<sup>3,4</sup> The present study  
52 identified a total of five pregnancies of which the adverse pregnancy outcome, including three fetal deaths,  
53  
54  
55  
56  
57  
58  
59  
60

1 may be related to isotretinoin use. Although the statistical analysis should be interpreted cautiously due to low  
2  
3 numbers, we observed an increased risk of fetal death whereas for congenital anomalies an increased risk  
4  
5 could not be determined. The neural tube defect in one of the cases is not a known CNS defect typical for  
6  
7 retinoid embryopathy<sup>3</sup> and furthermore, may be related to other factors since isotretinoin exposure was only  
8  
9 identified in the 30 days period before conception. Nevertheless, according to the isotretinoin PPP, the  
10  
11 pregnancy should not have occurred. Another pregnancy resulted in fetal death and also reported a  
12  
13 cardiovascular anomaly (not further specified) after isotretinoin exposure during the first weeks after  
14  
15 conception. This anomaly may be a typical symptom of retinoid embryopathy such as ventricular septic defect<sup>3</sup>,  
16  
17 but insufficient information on the congenital anomaly was available to draw these conclusions. Congenital  
18  
19 anomalies identified in other cases were also coded on high level only (e.g. congenital anomaly not further  
20  
21 specified). For the assessment of retinoid embryopathy, both detailed descriptions of the diagnosed congenital  
22  
23 anomaly as well as detailed information on drug exposure preferably verified by the patient whether the drug  
24  
25 was actually taken are necessary.

#### 26 27 **Strengths and weaknesses of the study**

28  
29  
30 A strength of this study is that we used a population based study including virtual complete and detailed drug  
31  
32 dispensing data and pregnancy outcome data, which enabled calculating accurate isotretinoin exposure rates  
33  
34 among pregnant women which can be extrapolated to the national situation to indicate impact on public  
35  
36 health. This would be more difficult and probably less accurate when using spontaneous reported cases or data  
37  
38 from teratology information services, since these data sources do not provide clear denominators to calculate  
39  
40 exposure rates and may suffer from substantial underreporting. Although our absolute numbers were small, all  
41  
42 exposure and outcome information was prospectively gathered and unbiased because nobody was aware of  
43  
44 the research hypothesis. Moreover, we simply confirmed an adverse reaction which is nowadays undisputed.

45  
46  
47 Our results might even underestimate the actual risk because no information can be provided on spontaneous  
48  
49 and elective abortions that occurred before gestational age of 16 weeks because these data are not captured in  
50  
51 the PRN database and these pregnancies were therefore not included in our cohort.

#### 52 53 **Implications and future research**

54  
55  
56 In the Netherlands, approximately 180,000 pregnancies are reported annually.<sup>20</sup> When extrapolating the 2.21  
57  
58 (95% CI 1.63 – 2.93) per 10,000 women exposed to isotretinoin during pregnancy to a national level, there  
59  
60

1 would be 29 to 52 pregnancies receiving isotretinoin per year yielding unnecessary high risks for congenital  
2 anomalies and fetal deaths. Therefore, it is in the interest of public health to implement effective PPPs and  
3 improve these measures or their compliance as much as possible to reduce isotretinoin use during pregnancy  
4 to the lowest possible level.  
5  
6  
7

8  
9  
10 With the present study reasons for PPP failure cannot be identified and only the period 1999 to 2007 has been  
11 evaluated. More recent data are necessary to further study the up to date situation of the isotretinoin PPP in  
12 the Netherlands in order to take appropriate action, especially since the last few years attention for the  
13 isotretinoin PPP might have improved the carefulness with which isotretinoin is prescribed and dispensed. In  
14 the Netherlands, the PPP is communicated to healthcare professionals via product information,<sup>21</sup> national  
15 general practitioner (GP) standards on treatment of acne,<sup>22</sup> drug prescription and dispensing systems,<sup>23</sup> the  
16 website of the Dutch Medicines Evaluation Board,<sup>24</sup> and the common (national) literature on drug  
17 information.<sup>25</sup> Furthermore, research on isotretinoin use in the Netherlands and the PPP is conducted and  
18 published in (inter)national scientific medical journals.<sup>9-11 17 26-29</sup>  
19  
20  
21  
22  
23  
24  
25  
26  
27

## 28 Conclusions

29  
30  
31 The safe use of isotretinoin is important for public health to prevent unnecessary high risks of congenital  
32 anomalies and fetal deaths. Although a PPP was implemented almost 15 years ago, we showed that there are  
33 still pregnancies exposed to isotretinoin in the Netherlands and moreover, we showed that in these exposed  
34 pregnancies there is an elevated risk of congenital anomalies and fetal death. These findings suggest an  
35 ongoing need to educate healthcare professionals and patients on the fetal risks of isotretinoin and the PPP.  
36 Before regulatory measures should be considered, the isotretinoin PPP requires further evaluation using more  
37 recent data to assess whether isotretinoin use among women with reproductive age has improved.  
38  
39  
40  
41  
42  
43  
44

## 45 FIGURE LEGENDS

46  
47  
48 **Figure 1:** Percentage of isotretinoin dispensings exceeding the maximum duration of 30 days per calendar year

49  
50  
51 **Figure 2:** Isotretinoin exposed pregnancies per 10,000 pregnancies per calendar year

52  
53 ——— Exposed to isotretinoin in 30 days before or during pregnancy

54  
55 - - - - Exposed to isotretinoin during pregnancy  
56  
57  
58  
59  
60



1 **Acknowledgements** The authors would like to thank the Netherlands Perinatal Registry for providing access to  
2  
3 their database and contribution to the manuscript.  
4

5 **Competing interests** All authors have completed the Unified Competing Interest form at  
6  
7 [www.icmje.org/coi\\_disclosure.pdf](http://www.icmje.org/coi_disclosure.pdf) and declare that LH and RH are employees of the PHARMO Institute. This  
8  
9 independent research institute performs financially supported studies for government and related healthcare  
10  
11 authorities and several pharmaceutical companies. MS is leading a research group that sometimes conducts  
12  
13 research for pharmaceutical companies. None related to the submitted work; no other relationships or  
14  
15 activities that could appear to have influenced the submitted work.  
16

17 **Details of contributors** Each author participated actively and sufficiently in this study. IZ, RR, LH, MS and BS  
18  
19 contributed to the study design and the interpretation of the data. IZ and LH collected and analysed the data.  
20  
21 IZ, RR, LH, RH, MS, SS and BS participated in the development and critical review of the manuscript for  
22  
23 important intellectual content and provided final approval of the version to be published. A statement that all  
24  
25 authors, external and internal, had full access to all of the data (including statistical reports and tables) in the  
26  
27 study and can take responsibility for the integrity of the data and the accuracy of the data analysis.  
28  
29

30 **Ethics approval** Not applicable. The research team did not have access to medical records.  
31  
32

33 **Funding** This study was supported by the Drug Safety Unit of the Dutch Inspectorate of Health Care.  
34  
35

36 **Data sharing** No additional data available.  
37  
38

39 **Transparency** The lead author (IZ) affirms that the manuscript is an honest, accurate, and transparent account  
40  
41 of the study being reported; that no important aspects of the study have been omitted; and that any  
42  
43 discrepancies from the study as planned (and, if relevant, registered) have been explained.  
44  
45

46 **Copyright** The Corresponding Author has the right to grant on behalf of all authors and does grant on behalf of  
47  
48 all authors, a worldwide licence to the Publishers and its licensees in perpetuity, in all forms, formats and  
49  
50 media (whether known now or created in the future), to i) publish, reproduce, distribute, display and store the  
51  
52 Contribution, ii) translate the Contribution into other languages, create adaptations, reprints, include within  
53  
54 collections and create summaries, extracts and/or, abstracts of the Contribution, iii) create any other derivative  
55  
56 work(s) based on the Contribution, iv) to exploit all subsidiary rights in the Contribution, v) the inclusion of  
57  
58  
59  
60

1  
2  
3  
4  
5  
6  
7  
8  
9  
10  
11  
12  
13  
14  
15  
16  
17  
18  
19  
20  
21  
22  
23  
24  
25  
26  
27  
28  
29  
30  
31  
32  
33  
34  
35  
36  
37  
38  
39  
40  
41  
42  
43  
44  
45  
46  
47  
48  
49  
50  
51  
52  
53  
54  
55  
56  
57  
58  
59  
60

electronic links from the Contribution to third party material where-ever it may be located; and, vi) licence any third party to do any or all of the above.

For peer review only

## References

1. European Medicines Agency (EMA). Annex I of the Summary information on a referral opinion following an arbitration pursuant to article 29 of directive 2001/83/EC for isotretinoin. 2003; Accessed 2 May 2013: [http://www.ema.europa.eu/docs/en\\_GB/document\\_library/Referrals\\_document/Isotretinoin\\_29/WC500010881.pdf](http://www.ema.europa.eu/docs/en_GB/document_library/Referrals_document/Isotretinoin_29/WC500010881.pdf)
2. Rosa FW. Teratogenicity of isotretinoin. *Lancet* 1983;2(8348):513.
3. Lammer EJ, Chen DT, Hoar RM, Agnish ND, Benke PJ, Braun JT, et al. Retinoic acid embryopathy. *N Engl J Med* 1985;313(14):837-41.
4. Dai WS, LaBraico JM, Stern RS. Epidemiology of isotretinoin exposure during pregnancy. *J Am Acad Dermatol* 1992;26(4):599-606.
5. Adams J, Lammer EJ. Neurobehavioral teratology of isotretinoin. *Reprod Toxicol* 1993;7(2):175-7.
6. Abroms L, Maibach E, Lyon-Daniel K, Feldman SR. What is the best approach to reducing birth defects associated with isotretinoin? *PLoS Med* 2006;3(11):e483.
7. Schaefer C, Meister R, Weber-Schoendorfer C. Isotretinoin exposure and pregnancy outcome: an observational study of the Berlin Institute for Clinical Teratology and Drug Risk Assessment in Pregnancy. *Arch Gynecol Obstet* 2010;281(2):221-7.
8. Autret-Leca E, Kreft-Jais C, Elefant E, Cissoko H, Darrouzain F, Grimaldi-Bensouda L, et al. Isotretinoin exposure during pregnancy: assessment of spontaneous reports in France. *Drug Saf* 2010;33(8):659-65.
9. Crijns I, Straus S, Luteijn M, Gispen-de Wied C, Raine J, de Jong-van den Berg L. Implementation of the harmonized EU isotretinoin Pregnancy Prevention Programme: a questionnaire survey among European regulatory agencies. *Drug Saf* 2012;35(1):27-32.
10. Teichert M, Visser LE, Dufour M, Rodenburg E, Straus SM, De Smet PA, et al. Isotretinoin use and compliance with the Dutch Pregnancy Prevention Programme: a retrospective cohort study in females of reproductive age using pharmacy dispensing data. *Drug Saf* 2010;33(4):315-26.
11. Crijns HJ, van Rein N, Gispen-de Wied CC, Straus SM, de Jong-van den Berg LT. Prescriptive contraceptive use among isotretinoin users in the Netherlands in comparison with non-users: a drug utilisation study. *Pharmacoepidemiol Drug Saf* 2012;21(10):1060-6.
12. Herings RM, Bakker A, Stricker BH, Nap G. Pharmaco-morbidity linkage: a feasibility study comparing morbidity in two pharmacy based exposure cohorts. *J Epidemiol Community Health* 1992;46(2):136-40.
13. WHO Collaborating Centre for Drug Statistics Methodology. Anatomical Therapeutic Chemical (ATC) index with Defined Daily Doses (DDDs). Accessed 4 October 2013: [http://www.whocc.no/atc\\_ddd\\_index/](http://www.whocc.no/atc_ddd_index/)
14. Stichting Perinatale Registratie Nederland. *Grote Lijnen 10 jaar Perinatale Registratie Nederland*. Utrecht: Stichting Perinatale Registratie Nederland, 2011.
15. Houweling LM, Bezemer ID, Penning-van Beest FJ, Meijer WM, van Lingen RA, Herings RM. First year of life medication use and hospital admission rates: premature compared with term infants. *J Pediatr* 2013;163(1):61-6 e1.
16. Barfield WD. Standard terminology for fetal, infant, and perinatal deaths. *Pediatrics* 2011;128(1):177-81.
17. Crijns I, Mantel-Teeuwisse A, Bloemberg R, Pinas E, Straus S, de Jong-van den Berg L. Healthcare professional surveys to investigate the implementation of the isotretinoin Pregnancy Prevention Programme: a descriptive study. *Expert Opin Drug Saf* 2013;12(1):29-38.
18. Pinheiro SP, Kang EM, Kim CY, Governale LA, Zhou EH, Hammad TA. Concomitant use of isotretinoin and contraceptives before and after iPledge in the United States. *Pharmacoepidemiol Drug Saf* 2013;22(12):1251-7.
19. Shin J, Cheetham TC, Wong L, Niu F, Kass E, Yoshinaga MA, et al. The impact of the iPLEDGE program on isotretinoin fetal exposure in an integrated health care system. *J Am Acad Dermatol* 2011;65(6):1117-25.

- 1 20. Stichting Perinatale Registratie Nederland. *Grote Lijnen 1999 - 2012*. Urecht: Stichting Perinatale  
2 Registratie Nederland, 2013.
- 3 21. Roaccutane Summary of Product Characteristics. Accessed 3 January 2014:<http://db.cbg->  
4 [meb.nl/IB-teksten/h10305.pdf](http://db.cbg-meb.nl/IB-teksten/h10305.pdf)
- 5 22. Smeets JG GS, Bruinsma, et al. NHG-standard acne. *Huisarts wet* 2007;50:259-68.
- 6 23. Implementatie Bijzonder Kenmerk: 'Let op zwangerschapspreventieprogramma' in Z-index. 2009;  
7 Accessed 3 March 2014:<https://www.z-index.nl/g->  
8 [standaard/beschrijvingen/functioneel/wijzigingen/mb/bijzondere-](https://www.z-index.nl/g-standaard/beschrijvingen/functioneel/wijzigingen/mb/bijzondere-)  
9 [kenmerken/IR%20BK%20Zwangerschapspreventieprogramma%20V-1-1-1.pdf](https://www.z-index.nl/g-standaard/beschrijvingen/functioneel/wijzigingen/mb/bijzondere-kenmerken/IR%20BK%20Zwangerschapspreventieprogramma%20V-1-1-1.pdf)
- 10 24. College ter Beoordeling van Geneesmiddelen / Medicines Evaluation Board (CBG/MEB).  
11 Zwangerschapspreventie programma's (ZPP). Accessed 3 March 2014:<http://www.cbg->  
12 [meb.nl/CBG/nl/humane-](http://www.cbg-meb.nl/CBG/nl/humane-geneesmiddelen/geneesmiddelenbew/zwangerschapspreventieprogramma/default.htm)  
13 [geneesmiddelen/geneesmiddelenbew/zwangerschapspreventieprogramma/default.htm](http://www.cbg-meb.nl/CBG/nl/humane-geneesmiddelen/geneesmiddelenbew/zwangerschapspreventieprogramma/default.htm)
- 14 25. Commissie Farmaceutische Hulp. Isotretinoïne: waarschuwingen en voorzorgen. .  
15 *Farmacotherapeutisch kompas. College van Zorgverzekeringen* 2007.
- 16 26. Crijns HJ, Straus SM, Gispens-de Wied C, de Jong-van den Berg LT. Compliance with pregnancy  
17 prevention programmes of isotretinoin in Europe: a systematic review. *Br J Dermatol*  
18 2011;164(2):238-44.
- 19 27. Fledderus S. Zwangerschapspreventie bij teratogene middelen faalt. *Medisch Contact*, 2012;48.
- 20 28. Manders KC, de Vries LC, Roumen FJ. Pregnancy after isotretinoin use. *Ned Tijdschr Geneesk*  
21 2013;157(41):A6567.
- 22 29. Crijns HJ. Teratogene middelen: zwangerschapspreventie kan beter. *Pharmaceutisch Weekblad*  
23 *(PW)*, 2012;October.
- 24
- 25
- 26
- 27
- 28
- 29
- 30
- 31
- 32
- 33
- 34
- 35
- 36
- 37
- 38
- 39
- 40
- 41
- 42
- 43
- 44
- 45
- 46
- 47
- 48
- 49
- 50
- 51
- 52
- 53
- 54
- 55
- 56
- 57
- 58
- 59
- 60

**Figure 1:** Percentage of isotretinoin dispensings exceeding the maximum duration of 30 days per calendar year



Percentage of isotretinoin dispensings exceeding the maximum duration of 30 days per calendar year  
135x101mm (300 x 300 DPI)

Review only

1  
2  
3  
4  
5  
6  
7  
8  
9  
10  
11  
12  
13  
14  
15  
16  
17  
18  
19  
20  
21  
22  
23  
24  
25  
26  
27  
28  
29  
30  
31  
32  
33  
34  
35  
36  
37  
38  
39  
40  
41  
42  
43  
44  
45  
46  
47  
48  
49  
50  
51  
52  
53  
54  
55  
56  
57  
58  
59  
60

Figure 2: Isotretinoin exposed pregnancies per 10,000 pregnancies per calendar year



Isotretinoin exposed pregnancies per 10,000 pregnancies per calendar year  
186x160mm (300 x 300 DPI)

## Supplementary information:

**Table S1: Classification system for congenital anomalies****1. Abdominal wall disorders and skin disorders**

## Abdominal wall defects

Gastroschisis

Omphalocele

Hernia diaphragmatica

Hernia umbilicalis

Hernia inguinalis

Relaxation diaphragma

## Skin anomalies

Congenital skin disorder

Hemangiome (>4cm<sup>2</sup>)

Naevus pigmentosus

Skin anomalies not further specified

Skin or abdominal wall defects not further specified

**2. Cardiovascular defects**

## Conotruncal defects

Right ventricular outflow tract obstruction defects

Left ventricular outflow tract obstruction defects

Septal defects

Single artery umbilical

Cardiovascular defects not further specified

**3. Defects in the digestive system**

Oro-facial clefts

Oesophageal atresia with(out) tracheoesophageal fistula

Duodenal, small intestine, ano-rectal atresia and stenosis

Morbus Hirschsprung

Malrotation / volvulus

Defects in the digestive system not further specified

**4. Defects in the nervous system**

## Neural tube defects

Anencephalus

Spina bifida / Meningo(myelo)cele

Encephalocele

Hydrocephaly / holoprosencephaly

Microcephaly

Nerveous-musculo defects

## Eye anomalies

Microphthalmos

Other eye anomalies

## Ear anomalies

Defects of nervous system not further specified

**5. Musculoskeletal defects**

1  
2  
3 Phocomelia  
4 Club foot - talipes equinovarus  
5 Polydactyly  
6 Syndactyly  
7 Hip dislocation and/or dysplasia  
8 Muskuloskeletal defects not further specified

---

10 *6. Respiratory defects*

---

11 Choanal atresia  
12 Cystic adenomatous malformation of the lung  
13 Abnormal trachea  
14 Lung hypoplasia  
15 Congenital lobair emfysema  
16 Hydro/chylo thorax  
17 Defects in the respiratory system not further specified

---

20 *7. Urogenital defects*

---

21 Hypospadias /epispadias  
22 Indeterminate sex  
23 Cryptorchism  
24 Urologic disorders  
25 Exstrophia vesicae  
26 Bilateral renal agenesis including Potter syndrome  
27 Congenital kidney cyste  
28 Obstructive uropathy  
29 Urogenital defect not further specified

---

32 *8. Multiple, syndrome or chromosomal anomalies*

---

33 Down syndrome  
34 Other chromosomal anomalies  
35 Syndromes  
36 Multiple anomalies (not specified previously)

---

38 *9. Other congenital anomalies*

---

39 Congenital anomalies not further specified

---



## STROBE Statement—checklist of items that should be included in reports of observational studies

|                              | Item No | Recommendation                                                                                                                                                                             | Page |
|------------------------------|---------|--------------------------------------------------------------------------------------------------------------------------------------------------------------------------------------------|------|
| <b>Title and abstract</b>    | 1       | (a) Indicate the study's design with a commonly used term in the title or the abstract                                                                                                     | 1    |
|                              |         | (b) Provide in the abstract an informative and balanced summary of what was done and what was found                                                                                        | 3    |
| <b>Introduction</b>          |         |                                                                                                                                                                                            |      |
| Background/rationale         | 2       | Explain the scientific background and rationale for the investigation being reported                                                                                                       | 4    |
| Objectives                   | 3       | State specific objectives, including any prespecified hypotheses                                                                                                                           | 5    |
| <b>Methods</b>               |         |                                                                                                                                                                                            |      |
| Study design                 | 4       | Present key elements of study design early in the paper                                                                                                                                    | 5    |
| Setting                      | 5       | Describe the setting, locations, and relevant dates, including periods of recruitment, exposure, follow-up, and data collection                                                            | 5    |
| Participants                 | 6       | <i>Case-control study</i> —Give the eligibility criteria, and the sources and methods of case ascertainment and control selection. Give the rationale for the choice of cases and controls | 5-6  |
|                              |         | <i>Case-control study</i> —For matched studies, give matching criteria and the number of controls per case                                                                                 | NA   |
| Variables                    | 7       | Clearly define all outcomes, exposures, predictors, potential confounders, and effect modifiers. Give diagnostic criteria, if applicable                                                   | 5-78 |
| Data sources/<br>measurement | 8*      | For each variable of interest, give sources of data and details of methods of assessment (measurement). Describe comparability of assessment methods if there is more than one group       | 6-7  |
| Bias                         | 9       | Describe any efforts to address potential sources of bias                                                                                                                                  | 7    |
| Study size                   | 10      | Explain how the study size was arrived at                                                                                                                                                  | 6-7  |
| Quantitative variables       | 11      | Explain how quantitative variables were handled in the analyses. If applicable, describe which groupings were chosen and why                                                               | 6-8  |
| Statistical methods          | 12      | (a) Describe all statistical methods, including those used to control for confounding                                                                                                      | 7    |
|                              |         | (b) Describe any methods used to examine subgroups and interactions                                                                                                                        | 7    |
|                              |         | (c) Explain how missing data were addressed                                                                                                                                                | NA   |
|                              |         | (d) <i>Case-control study</i> —If applicable, explain how matching of cases and controls was addressed                                                                                     | NA   |
|                              |         | (e) Describe any sensitivity analyses                                                                                                                                                      | 6    |

Continued on next page

| <b>Results</b>           |     |                                                                                                                                                                                                              | <b>Page</b>   |
|--------------------------|-----|--------------------------------------------------------------------------------------------------------------------------------------------------------------------------------------------------------------|---------------|
| Participants             | 13* | (a) Report numbers of individuals at each stage of study—eg numbers potentially eligible, examined for eligibility, confirmed eligible, included in the study, completing follow-up, and analysed            | 7             |
|                          |     | (b) Give reasons for non-participation at each stage                                                                                                                                                         | NA            |
|                          |     | (c) Consider use of a flow diagram                                                                                                                                                                           | NA            |
| Descriptive data         | 14* | (a) Give characteristics of study participants (eg demographic, clinical, social) and information on exposures and potential confounders                                                                     | 8; (Table 1)  |
|                          |     | (b) Indicate number of participants with missing data for each variable of interest                                                                                                                          | NA            |
| Outcome data             | 15* | <i>Case-control study</i> —Report numbers in each exposure category, or summary measures of exposure                                                                                                         | 9 (Table 2)   |
| Main results             | 16  | (a) Give unadjusted estimates and, if applicable, confounder-adjusted estimates and their precision (eg, 95% confidence interval). Make clear which confounders were adjusted for and why they were included | 11; (Table 3) |
|                          |     | (b) Report category boundaries when continuous variables were categorized                                                                                                                                    | NA            |
|                          |     | (c) If relevant, consider translating estimates of relative risk into absolute risk for a meaningful time period                                                                                             | NA            |
| Other analyses           | 17  | Report other analyses done—eg analyses of subgroups and interactions, and sensitivity analyses                                                                                                               | 11;(Table 3)  |
| <b>Discussion</b>        |     |                                                                                                                                                                                                              |               |
| Key results              | 18  | Summarise key results with reference to study objectives                                                                                                                                                     | 12-13         |
| Limitations              | 19  | Discuss limitations of the study, taking into account sources of potential bias or imprecision. Discuss both direction and magnitude of any potential bias                                                   | 14            |
| Interpretation           | 20  | Give a cautious overall interpretation of results considering objectives, limitations, multiplicity of analyses, results from similar studies, and other relevant evidence                                   | 13-14         |
| Generalisability         | 21  | Discuss the generalisability (external validity) of the study results                                                                                                                                        | 15            |
| <b>Other information</b> |     |                                                                                                                                                                                                              |               |
| Funding                  | 22  | Give the source of funding and the role of the funders for the present study and, if applicable, for the original study on which the present article is based                                                | 16            |

\*Give information separately for cases and controls in case-control studies and, if applicable, for exposed and unexposed groups in cohort and cross-sectional studies.

**Note:** An Explanation and Elaboration article discusses each checklist item and gives methodological background and published examples of transparent reporting. The STROBE checklist is best used in conjunction with this article (freely available on the Web sites of PLoS Medicine at <http://www.plosmedicine.org/>, Annals of Internal Medicine at <http://www.annals.org/>, and Epidemiology at <http://www.epidem.com/>). Information on the STROBE Initiative is available at [www.strobe-statement.org](http://www.strobe-statement.org).

# BMJ Open

## Isotretinoin exposure during pregnancy: a population-based study in the Netherlands

|                                 |                                                                                                                                                                                                                                                                                                                                                                                                                                                                                                                                                                                               |
|---------------------------------|-----------------------------------------------------------------------------------------------------------------------------------------------------------------------------------------------------------------------------------------------------------------------------------------------------------------------------------------------------------------------------------------------------------------------------------------------------------------------------------------------------------------------------------------------------------------------------------------------|
| Journal:                        | <i>BMJ Open</i>                                                                                                                                                                                                                                                                                                                                                                                                                                                                                                                                                                               |
| Manuscript ID:                  | bmjopen-2014-005602.R1                                                                                                                                                                                                                                                                                                                                                                                                                                                                                                                                                                        |
| Article Type:                   | Research                                                                                                                                                                                                                                                                                                                                                                                                                                                                                                                                                                                      |
| Date Submitted by the Author:   | 21-Aug-2014                                                                                                                                                                                                                                                                                                                                                                                                                                                                                                                                                                                   |
| Complete List of Authors:       | Zomerdijk, Ingeborg; Erasmus University Medical Center, Medical Informatics<br>Ruiter, Rikje; Groene Hart Hospital, Internal Medicine; Erasmus University Medical Center, Epidemiology<br>Houweling, Leanne; PHARMO Institute for Drug Outcomes Research, Herings, Ron; PHARMO Institute for Drug Outcomes Research, Sturkenboom, Miriam; Erasmus University Medical Center, Medical Informatics<br>Straus, Sabine; Erasmus University Medical Center, Medical Informatics<br>Stricker, Bruno; Erasmus University Medical Center, Epidemiology; Inspectorate of Health Care, Drug Safety Unit |
| <b>Primary Subject Heading</b>: | Epidemiology                                                                                                                                                                                                                                                                                                                                                                                                                                                                                                                                                                                  |
| Secondary Subject Heading:      | Pharmacology and therapeutics, Dermatology                                                                                                                                                                                                                                                                                                                                                                                                                                                                                                                                                    |
| Keywords:                       | Acne < DERMATOLOGY, EPIDEMIOLOGY, Adverse events < THERAPEUTICS, isotretinoin, pregnancy prevention programme                                                                                                                                                                                                                                                                                                                                                                                                                                                                                 |
|                                 |                                                                                                                                                                                                                                                                                                                                                                                                                                                                                                                                                                                               |

SCHOLARONE™  
Manuscripts

only

**Isotretinoin exposure during pregnancy: a population-based study in the Netherlands**

Inge M Zomerdijk, Rikje Ruiters, Leanne MA Houweling, Ron MC Herings, Miriam CJM Sturkenboom, Sabine MJM Straus, Bruno H Stricker

Department of Medical Informatics, Erasmus University Medical Center, Dr. Molewaterplein 50, 3015 GE, Rotterdam, The Netherlands Inge M Zomerdijk

PhD candidate

Internal medicine, GHZ, Bleulandweg 10, 2803 HH, Gouda, the Netherlands Rikje Ruiters  
medical doctor

PHARMO Institute for Drug Outcomes Research, Van Deventerlaan 30-40, 3528 AE Utrecht, The Netherlands

Leanne MA Houweling

business development manager

PHARMO Institute for Drug Outcomes Research, Van Deventerlaan 30-40, 3528 AE Utrecht, The Netherlands

Ron MC Herings

director

Department of Medical Informatics, Erasmus University Medical Center, Dr. Molewaterplein 50, 3015 GE, Rotterdam, The Netherlands Miriam CJM Sturkenboom

professor

Department of Medical Informatics, Erasmus University Medical Center, Dr. Molewaterplein 50, 3015 GE, Rotterdam, The Netherlands Sabine MJM Straus

associate professor

Department of Epidemiology, Erasmus University Medical Center, Dr. Molewaterplein 50, 3015 GE, Rotterdam, The Netherlands Bruno H Stricker

professor

Correspondence to: Bruno H Stricker [b.stricker@erasmusmc.nl](mailto:b.stricker@erasmusmc.nl)

Department of Epidemiology, Erasmus University Medical Centre, P.O. Box 2040, 3000 CA Rotterdam, The Netherlands.

key words: isotretinoin, pregnancy prevention programme, teratogens, congenital malformations

Word count: 3580 words

**ABSTRACT**

**Objective** To estimate isotretinoin exposure in Dutch pregnant women despite the implemented pregnancy prevention programme (PPP) and secondly, to analyse the occurrence of adverse fetal or neonatal outcomes in these isotretinoin exposed pregnancies.

**Design** Population based study

**Setting** the Netherlands

**Participants** a cohort of 203,962 pregnancies with onset between 1 January 1999 and 1 September 2007 consisting of 208,161 fetuses or neonates.

**Main outcome measures** Isotretinoin exposure in the 30 days before or during pregnancy. Proportions of adverse fetal or neonatal outcomes, defined as intrauterine deaths  $\geq$  16 week of gestation and neonates with major congenital anomalies. Odds ratios (ORs) with 95% confidence intervals (CI) adjusted for maternal age were calculated to estimate the risk of adverse fetal or neonatal outcome after maternal isotretinoin exposure.

**Results** 51 pregnancies, 2.5 (95%CI 1.9 to 3.3) per 10,000 pregnancies, were exposed to isotretinoin despite the pregnancy prevention programme. 45 of these pregnancies, 2.2 (95%CI 1.6 to 2.9) per 10,000 pregnancies, were exposed to isotretinoin during pregnancy and six additional women became pregnant within 30 days after isotretinoin discontinuation. In sixty percent of isotretinoin exposed pregnancies, women started isotretinoin while already pregnant. In five out of the 51 isotretinoin exposed pregnancies, 9.4% (95%CI 1.3 to 17.6), had an adverse fetal or neonatal outcome. The OR for adverse fetal or neonatal outcomes after isotretinoin exposure in 30 days before or during pregnancy was 2.3 (95%CI 0.9 to 5.7) after adjustment for maternal age.

**Conclusions** Although a PPP was already implemented in 1988, we showed that isotretinoin exposed pregnancies in the Netherlands and adverse fetal and neonatal events still occur. These findings from the Netherlands add to the evidence that there is no full compliance to the isotretinoin PPP in many Western countries. Given the limited success of iPLEDGE, the question is which further measures are able to improve compliance.

**ARTICLE SUMMARY****Strengths and limitations of this study**

- This is the first population-based study in the EU on isotretinoin exposure during pregnancy in a large cohort of more than 200,000 pregnancies which enabled estimating isotretinoin exposure rates among pregnant women and its consequences on a nationwide scale.
- From the virtually complete and detailed drug dispensing data, isotretinoin exposure could only be estimated since drug dispensing data does not ascertain actual drug use and precise exposure intervals. However, patients coming for refills are usually taking their drug.
- Spontaneous abortions before gestational age of 16 weeks and elective abortions were not included in our cohort and therefore our results probably underestimate the number of isotretinoin exposed pregnancies and its consequences.
- The analysis was restricted to adverse fetal and neonatal outcomes in general since specific teratogenic risk could not be estimated with data lacking information on pregnancies until 16 weeks of gestation and lacking detailed descriptions of adverse fetal and neonatal outcomes.

## INTRODUCTION

Isotretinoin, a vitamin A derivative, is licensed in the European Union (EU) since 1983 and is indicated for systemic treatment of severe acne (such as nodular or conglobate acne or acne at risk of permanent scarring) in patients resistant to adequate courses of standard therapy with systemic antibacterials and topical therapy.<sup>1</sup>

The teratogenic potential is an important characteristic of isotretinoin. Animal studies already suggested teratogenic effects in humans and isotretinoin has been contraindicated for use during pregnancy since the very beginning of the marketing authorisation. Despite this contraindication, the first cases of congenital anomalies after isotretinoin use during pregnancy were documented already in 1983.<sup>2</sup> As described by Lammer et al. in 1985, isotretinoin embryopathy consists of craniofacial, cardiac, thymic and central nervous system (CNS) defects.<sup>3</sup> They found a relative risk of 26 for this group of major congenital malformations after systemic isotretinoin exposure during some parts of the first 10 weeks after conception.<sup>3</sup> Elective termination of pregnancy (ETOP) was decided in more than 50% of exposed pregnancies and 20% of the remaining pregnancies ended in a first trimester spontaneous abortion.<sup>3</sup> Reports of congenital anomalies after isotretinoin use accumulated and consequently, in 1988 the marketing authorisation holder of isotretinoin implemented a world-wide Pregnancy Prevention Programme (PPP) to better prevent pregnancies among systemic isotretinoin users.<sup>4</sup> The PPP included an educational programme for prescribers and patients including material to be used in counselling women about the need to prevent pregnancy while taking isotretinoin. Conditions for prescribing included a negative pregnancy test, the use of reliable contraception and a signed patient consent form.<sup>4</sup> In 2003, a review of isotretinoin by the European Medicine Agency (EMA) resulted in a compulsory European harmonised PPP for all isotretinoin containing products.<sup>1</sup> The elements of the European wide PPP are listed in box 1.

### **Box 1:** Elements of the EU isotretinoin PPP

---

1. Isotretinoin is contraindicated in pregnant women and should only be initiated in women of reproductive age who understand the teratogenic risk and the need for regular follow-up
  2. Use of effective contraceptive measures from four weeks before isotretinoin initiation until four weeks after treatment discontinuation. At least one and preferably two complementary forms of contraception including a barrier method should be used.
  3. Pregnancy testing should be done before, during and five weeks after discontinuation of isotretinoin
  4. Isotretinoin should only be prescribed by or under the supervision of a physician with experience in the use of systemic retinoids
  5. Prescription should be limited to 30 days of treatment and continuation of treatment requires a new prescription.
  6. Dispensing of isotretinoin should occur within a maximum of seven days after prescription.
  7. Educational programmes for healthcare professionals including prescribers and pharmacists, and patients are in place to inform them about the teratogenic risk and to create awareness of the PPP.
-

1 The safe use of isotretinoin in women of reproductive age is in the interest of public health because of the  
2  
3 potential risk of spontaneous and elective abortions, and, more importantly, children with major congenital  
4  
5 anomalies require continuous healthcare throughout their life. Although a PPP has been implemented in the  
6  
7 EU, pregnancies during isotretinoin therapy still occur.<sup>5 6</sup> The regulatory authorities of sixteen EU member  
8  
9 states responded in 2009 to a survey that isotretinoin exposed pregnancies have occurred in their country.<sup>7</sup> A  
10  
11 French study between 2003 and 2006 estimated a pregnancy rate from 0.4 to 1.2 per 1000 female isotretinoin  
12  
13 users within reproductive age.<sup>6</sup> Studies in the Netherlands observed that only 52% to 59% of the female  
14  
15 isotretinoin users of reproductive age used concomitant hormonal contraceptives, which was higher than the  
16  
17 39%-46% observed in the general female population of similar age, but lower than anticipated.<sup>8 9</sup> Although  
18  
19 these studies show limited compliance with the isotretinoin PPP, it is not known whether isotretinoin exposure  
20  
21 also occurs during pregnancy and what the outcome of these pregnancies is. Therefore, the objective of our  
22  
23 study was to estimate isotretinoin exposure in Dutch pregnant women despite the implemented PPP and  
24  
25 secondly, to analyse the occurrence of adverse fetal and neonatal outcomes in these isotretinoin exposed  
26  
27 pregnancies.

## 28 29 **METHODS**

### 30 31 **Data sources**

32  
33 For this population based study a cohort of 203,962 pregnancies consisting of 208,161 fetuses was constructed  
34  
35 using a linkage between the PHARMO Database Network and the Netherlands Perinatal Registry (PRN). The  
36  
37 PHARMO Database Network is a dynamic population-based cohort including, amongst other information, drug-  
38  
39 dispensing records from community pharmacies for more than 3 million individuals in the Netherlands  
40  
41 (approximately 20% of the Dutch population) that are collected since 1986.<sup>10</sup> The drug dispensing data contain  
42  
43 the following information per prescription: the Anatomical Therapeutic Chemical (ATC) classification of the  
44  
45 drug, dispensing date, regimen, quantity dispensed and estimated length of duration of use.<sup>11</sup> The PRN is a  
46  
47 nationwide registry that contains linked and validated data from four databases: the national obstetric  
48  
49 database for midwives (LVR-1), the national obstetric database for gynaecologists (LVR-2), the national  
50  
51 obstetric database for general practitioners (LVR-h) and the national neonatal/paediatric database (LNR).<sup>12</sup> The  
52  
53 registry contains information about care before, during, and after delivery as well as maternal and neonatal  
54  
55 characteristics and outcome of 95% of 180,000 pregnancies annually in the Netherlands with a gestational age  
56  
57 of at least 16 weeks. The PRN includes information on pregnancy outcome including congenital anomalies  
58  
59  
60



1 detected during pregnancy, at birth or within the first year after birth. The probabilistic linking method  
2  
3 between PHARMO and PRN has been described in detail elsewhere but was generally based on the birth date  
4  
5 of the mother and child and their postal zip codes.<sup>13</sup> To be included in the cohort the mother should be  
6  
7 registered in the community pharmacy database of PHARMO during the whole pregnancy. The date of  
8  
9 conception was estimated based on the last menstrual period or ultrasound, as recorded in the PRN, and was  
10  
11 truncated to full weeks.

### 12 13 **Isotretinoin dispensings**

14  
15 All dispensings for systemic (oral) isotretinoin (ATC D10BA01) filled in community pharmacies by women  
16  
17 included in our cohort within the 12-months period before or during pregnancy were extracted from the  
18  
19 PHARMO Database Network. Considering a daily dosage of 0.5 mg-1mg per kilogram daily,<sup>1</sup> isotretinoin  
20  
21 prescriptions dispensed on the same day were assumed to be used simultaneously and therefore these  
22  
23 dispensings were pooled and considered as one dispensing (e.g. the prescriptions of a 10 mg and 20 mg tablets  
24  
25 dispensed at the same time to reach a daily dosage of 30mg). For each isotretinoin dispensing, the length of  
26  
27 the dispensing was calculated by dividing the total number of prescribed units by the number of units (doses)  
28  
29 to be taken per day. In case isotretinoin dispensings that were pooled together had different lengths, the  
30  
31 length of the single dispensing with the longest duration was used. To assess compliance with the PPP, we  
32  
33 calculated the proportion of dispensings that exceeded 30 days, which is the maximum length according to the  
34  
35 EU PPP.  
36  
37

### 38 39 **Drug exposure interval**

40  
41 For all pregnancies (n=203,962) with of gestational age of at least 16 weeks included in the cohort, isotretinoin  
42  
43 exposure was estimated based on isotretinoin dispensing data (ATC D10BA01) filled by the mother during the  
44  
45 12-months period before and during pregnancy. Exposure in person time (days) was calculated by dividing the  
46  
47 total number of prescribed units by the number of prescribed units per day. Isotretinoin exposure periods were  
48  
49 defined considering a possible overlap of isotretinoin dispensings. Gaps, isotretinoin free periods between two  
50  
51 isotretinoin dispensings, were not permitted meaning that an isotretinoin exposure period ends once an  
52  
53 isotretinoin free period was identified. Using the start and end date of the isotretinoin exposure period, the  
54  
55 number of days exposed was estimated for the following exposure intervals: 30 days before conception, first  
56  
57 90 days of gestation (first trimester), day 90-179 of gestation (second trimester) and day 180 – delivery (third  
58  
59  
60

1 trimester). In addition, the entire period 30 days before pregnancy until delivery as well as the period from 30  
2  
3 days before till the end of the first trimester were analysed separately.

#### 6 **Adverse fetal or neonatal outcomes**

7  
8 For each fetus (n=208,161), we determined whether adverse fetal or neonatal outcomes were reported.  
9  
10 Adverse fetal or neonatal outcomes were defined as all intrauterine deaths  $\geq$  16 week of gestation and live  
11  
12 born infants with major congenital anomalies. If possible, congenital anomalies were categorised into nine sub-  
13  
14 groups: abdominal wall and skin disorders; cardiovascular defects; defects in the digestive system; defects in  
15  
16 the nervous system; musculoskeletal defects; respiratory defects; urogenital defects; multiple, syndrome or  
17  
18 chromosomal anomalies; or other congenital malformations. As we were interested in adverse fetal outcomes  
19  
20 potentially induced by maternal drug exposure, chromosomal anomalies were not considered as an adverse  
21  
22 outcome in the analyses.  
23

#### 25 **Analysis**

26  
27 Potential exposure to isotretinoin in the 30 days before or during pregnancy was calculated per 10,000  
28  
29 pregnancies for the aforementioned exposure intervals including their 95% confidence intervals (95% CIs). The  
30  
31 proportions of adverse fetal outcome among isotretinoin exposed and unexposed fetuses or neonates were  
32  
33 calculated including their 95% CIs. We used multiple logistic regression models to calculate odds ratios (ORs)  
34  
35 and 95% CIs to estimate associations between adverse fetal or neonatal outcome and maternal isotretinoin  
36  
37 exposure. We adjusted for maternal age at conception (<20, 20-24, 25-29, 30-34,  $\geq$ 35), and if possible also for  
38  
39 calendar time (year of conception) and gender of the infant. Analyses for specific congenital anomalies were  
40  
41 performed when > 3 cases were observed. The t-test or Fisher exact test was used to derive p-values when  
42  
43 comparing continuous or categorical variables between study groups. Statistical significance was assumed for  
44  
45 two-sided p-values <0.05. Statistical analyses were performed using SAS version 9.2 (SAS Institute, Cary, North  
46  
47 Carolina).  
48

#### 50 **RESULTS**

51  
52  
53 Between 1 January 1999 and 1 September 2007 in the Netherlands, a total of 203,962 pregnancies  
54  
55 corresponding to 208,161 fetuses (including multiple births) were included in our study. The mean maternal  
56  
57  
58  
59  
60

age at conception was 30.3 years (SD 4.6) and mean duration of pregnancy was 39 weeks and 3 days (SD 19 days).

### Isotretinoin dispensings

A total of 416 isotretinoin dispensings to 130 of the 203,962 women in the 12-months period before or during pregnancy were identified. In 139 of the 416 isotretinoin dispensings (33.4%), the dispensing consisted of > 30 days of isotretinoin use. Figure 1 shows that the percentage of isotretinoin dispensings in the year before or during pregnancy exceeding the maximum duration of 30 days decreased over calendar time from 50% in 2001 to 13% in 2007.

### Isotretinoin exposed pregnancies

Demographics for isotretinoin exposed and unexposed pregnancies are presented in table 1.

**Table 1:** Description of the study population

|                                                                | Isotretinoin exposed*       | Isotretinoin unexposed                            | <i>p</i> -value |
|----------------------------------------------------------------|-----------------------------|---------------------------------------------------|-----------------|
| <i>Pregnancies (N=203,962)</i>                                 | 51                          | 203,911                                           |                 |
| Mean ( $\pm$ SD) maternal age at conception in years (95% CI)  | 29.1 (4.9)<br>(27.8 – 30.5) | 30.3 (4.7)<br>(30.3 – 30.3)                       | 0.56            |
| Mean ( $\pm$ SD) gestational age at delivery in weeks (95% CI) | 39 (25 days)<br>(38 – 40)   | 39, 3 days (19 days)<br>(39, 3 days – 39, 3 days) | 0.33            |
| <i>Fetuses (N=208,161)</i>                                     | 53                          | 208,108                                           |                 |
| Gender (boy %)                                                 | 47.2%<br>(33.3 – 61.1)      | 51.5%<br>(51.3 – 51.7)                            | 0.53            |
| <i>Maternal age at conception in years, n, column %.</i>       |                             |                                                   | 0.37            |
| < 20 years of age                                              | 2 (3.8%)                    | 4,063 (2.0%)                                      |                 |
| $\geq$ 20 -25 years of age                                     | 7 (13.2%)                   | 22,144 (10.6%)                                    |                 |
| $\geq$ 25 -30 years of age                                     | 21 (39.6%)                  | 68,366 (32.9%)                                    |                 |
| $\geq$ 30 -35 years of age                                     | 14 (26.4%)                  | 81,581 (39.2%)                                    |                 |
| $\geq$ 35 years of age                                         | 9 (17.0%)                   | 31,951 (15.4%)                                    |                 |
| <i>Gestational age at delivery, n, column %.</i>               |                             |                                                   | 0.64            |
| < 27 weeks                                                     | 1 (1.9%)                    | 2,198 (1.1%)                                      |                 |
| 27 - 30 weeks                                                  | 1 (1.9%)                    | 1,167 (0.6%)                                      |                 |
| 31-33 weeks                                                    | 0 (0.0%)                    | 2,008 (1.0%)                                      |                 |
| 34-36 weeks                                                    | 3 (5.7%)                    | 7,126 (3.4%)                                      |                 |
| 37-39 weeks                                                    | 12 (22.6%)                  | 50,854 (24.4%)                                    |                 |
| > 39 weeks                                                     | 36 (67.9%)                  | 144,755 (69.5%)                                   |                 |
| Adverse fetal outcome, n;% (95% CI)                            | 5;<br>9.4% (1.3 -17.6)      | 9,041;<br>4.3% (4.3 – 4.4)                        | 0.08            |

\*in the 30 days before conception or during pregnancy

Overall, 51 pregnancies, 2.5 (95%CI 1.9 to 3.3) per 10,000 pregnancies, were potentially exposed to isotretinoin in the 30 days before conception or during pregnancy, despite the implemented pregnancy prevention programme. Forty-five pregnant women, 2.2 (95%CI 1.6 – 2.9) per 10,000 pregnancies, were estimated to be exposed to isotretinoin during pregnancy of whom 27 (60%) started isotretinoin treatment while already being pregnant. In 18 pregnancies (40%), the conception occurred during isotretinoin treatment. Six pregnancies were identified within one month after isotretinoin discontinuation and were estimated to be exposed only before conception. In 40 out of 203,962 pregnancies, 2.0 (95% CI 1.4 – 2.6) per 10,000 pregnancies, an isotretinoin prescription was filled during pregnancy and 32 pregnancies, 1.6 (95% CI 1.1 – 2.2) per 10,000 pregnancies, received isotretinoin more than once during pregnancy. The number of isotretinoin dispensings per pregnancy ranged from 1 to 7, with a median of 2.5. The estimated isotretinoin exposure per exposure interval is presented in table 2.

**Table 2:** Potential isotretinoin exposed pregnancies per exposure interval

| Isotretinoin exposure interval*                                      | Exposed pregnancies (N=203,962) | Exposed pregnancies per 10,000 pregnancies (95% CI) | Median number of days exposed per pregnancy (range) |
|----------------------------------------------------------------------|---------------------------------|-----------------------------------------------------|-----------------------------------------------------|
| 30 days before conception (30 days period)                           | 23                              | 1.1 (0.7 – 1.7)                                     | 24 (range 3 – 30)                                   |
| 1 <sup>st</sup> trimester (90 days period)                           | 28                              | 1.4 (0.9 – 2.0)                                     | 31 (range 3 – 88)                                   |
| 2 <sup>nd</sup> trimester (90 days period)                           | 25                              | 1.2 (0.8 – 1.8)                                     | 57 (range 1 – 90)                                   |
| 3 <sup>rd</sup> trimester (90-103 days period)                       | 26                              | 1.3 (0.9 – 1.8)                                     | 62 (range 1 – 103)                                  |
| During pregnancy (270 days period)                                   | 45                              | 2.2 (1.6 – 2.9)                                     | 63 (range 3 – 236)                                  |
| 30 days before or during pregnancy (300 days period)                 | 51                              | 2.5 (1.9 – 3.3)                                     | 63 (range 7 – 236)                                  |
| 30 days before or during 1 <sup>st</sup> trimester (120 days period) | 35                              | 1.7 (1.2 – 2.4)                                     | 32 (range 7 – 114)                                  |

CI=Confidence interval.

\*Categories are not mutually exclusive but indicate the number of pregnancies exposed to isotretinoin during that exposure interval

Among the pregnancies estimated to be exposed to isotretinoin during pregnancy (n=45), the number of exposed days during pregnancy ranged from 3 to 236 days with a median of 63 days. Figure 2 shows that the number of women estimated to be exposed to isotretinoin during pregnancy was the highest in 2006 with 3.5 pregnancies (95% CI 1.7 – 6.4) per 10,000 pregnancies.

## Adverse fetal or neonatal outcomes

Independent of isotretinoin exposure, adverse fetal or neonatal outcomes were observed for 9,046 of the 208,161 fetuses (4.4%, 95% CI 4.3 – 4.4). The 51 pregnancies potentially exposed to isotretinoin in 30 days before conception or during pregnancy corresponded to 53 fetuses or neonates including two multiple births. Five of these, all singletons, had an adverse fetal or neonatal outcome (9.4% [95% CI 3.5 – 19.7]). These included three intrauterine deaths and two live born infants with major congenital anomalies (see table 3). Among those potentially exposed during pregnancy only (n=47), 6.4% (95% CI 1.7 – 16.4) had an adverse fetal or neonatal outcome. The odds ratio (OR) for adverse fetal or neonatal outcome after potential isotretinoin exposure in the 30 days before or during pregnancy was 2.3 (95% CI 0.9 – 5.7) after adjustment for maternal age (see table 3). Restricting the analysis to the potential isotretinoin exposure during pregnancy, the adjusted OR of an adverse fetal outcome was 1.5 (95% CI 0.5 – 4.8). The number of cases was too low to allow for adjustments in addition to maternal age. The adjusted OR of any fetal or neonatal outcome was significantly increased at 3.6 (95%CI 1.4-9.4) for isotretinoin exposure during the 30 days before or first trimester of pregnancy.

**Table 3:** Odds ratios for adverse fetal and neonatal outcomes and isotretinoin exposure in 30 days before or during pregnancy

| Isotretinoin exposed fetuses                       | Exposed fetuses with adverse outcomes | OR (95% CI)        | Adjusted OR* (95% CI) |
|----------------------------------------------------|---------------------------------------|--------------------|-----------------------|
| During pregnancy (N=47)                            | 3†                                    | 1.5<br>(0.5 – 4.8) | 1.5<br>(0.5 – 4.8)    |
| 30 days before or during pregnancy (N=53)          | 5†‡                                   | 2.3<br>(0.9 – 5.8) | 2.3<br>(0.9 – 5.7)    |
| 30 days before or 1 <sup>st</sup> trimester (N=35) | 5†‡                                   | 3.7<br>(1.4 – 9.5) | 3.6<br>(1.4 – 9.4)    |

CI=confidence interval

\* maternal age in categories (<20, 20-24, 25-29, 30-34, ≥35)

† Includes three intrauterine deaths.

- 1) in week 19, potentially exposed first 29 days following conception;
- 2) in week 35, potentially exposed 10 weeks following conception and from week 18 until week 32;
- 3) in week 38, also reported an unspecified septal defect; potentially exposed first 8 days following conception, during week 12 until 24, during week 28 until 38.

‡ Includes two live born infants with major congenital anomalies.

- 1) Neural tube defect, potentially exposed all 30 days before conception, not after conception.
- 2) Major congenital anomaly not further specified, potentially exposed the first 15 days of the 30 days before conception, not after conception.

## DISCUSSION

This study shows that 2 per 10,000 pregnancies were exposed to isotretinoin despite the PPP which is implemented to prevent isotretinoin use during pregnancy. Although this study was not intended to estimate

1 the teratogenic risks of isotretinoin, adverse fetal and neonatal outcomes among these exposed pregnancies  
2 were observed. That there are still women who are using isotretinoin during pregnancy despite the  
3 implementation of the PPP is of major concern. Especially since the majority of isotretinoin exposed women  
4 (60%) were already pregnant at the time of first isotretinoin prescription and it seems that pregnancy was not  
5 always excluded before isotretinoin dispensing (box 1). These exposed pregnancies could probably have been  
6 prevented when appropriate pregnancy testing would have been performed. Furthermore, it was earlier  
7 demonstrated that women of reproductive age treated with isotretinoin did not always use effective  
8 contraceptive measures because only up to 59% of these women concomitantly used hormonal  
9 contraceptives.<sup>8,9</sup> Our study showed that compliance with the recommended maximum length of prescription  
10 of 30 days was limited since one third of isotretinoin dispensings exceeded 30 days, which however decreased  
11 from 50% in 1999 to 13% in 2007. Based on these findings it is clear that compliance with the PPP in the  
12 Netherlands between 1999 and 2007 was incomplete. Limited compliance with the PPP was also observed in a  
13 survey among Dutch pharmacists which indicated that in 2007 and 2011, 44% and 49% of pharmacists  
14 respectively checked the use of contraception at every isotretinoin dispensing.<sup>14</sup> The percentage of pharmacists  
15 that asked for negative pregnancy tests was stable with 15% and 16% respectively and is in line with our study  
16 which demonstrated that pregnancy is not always excluded before initiating isotretinoin and result in  
17 isotretinoin exposed pregnancies that could have been prevented. Our study showed that compliance with the  
18 recommended maximum length of prescription of 30 days was limited since one third of isotretinoin  
19 dispensings exceeded 30 days which however decreased from 50% in 1999 to 13% in 2007, Based on these  
20 results it is clear that compliance with the PPP in the Netherlands between 1999 and 2007 was incomplete.  
21 These findings suggest an ongoing need to educate healthcare professionals and patients on the fetal risks of  
22 isotretinoin and the PPP, especially since isotretinoin is mostly used in young women of reproductive age.  
23  
24 Previous studies on isotretinoin use during pregnancy in other Western countries showed comparable results  
25 indicating that the limited compliance to the PPP is not restricted to the Netherlands.<sup>6, 15-17</sup> In the United States  
26 (US), the most recent isotretinoin PPP, called iPLEDGE, has been implemented since 2006 and is stricter than  
27 the EU PPP. iPLEDGE is an internet-based system that requires registration of all stakeholders with monthly  
28 updates on prescription, pregnancy tests, contraceptive use, and acknowledgement of risks.<sup>17</sup> The pregnancy  
29 rate among isotretinoin users in the US with the iPLEDGE PPP was estimated at 2.7 per 1,000 treatment  
30 courses and did not change compared to the previous PPP called SMART (System to Manage Accutane Related  
31  
32  
33  
34  
35  
36  
37  
38  
39  
40  
41  
42  
43  
44  
45  
46  
47  
48  
49  
50  
51  
52  
53  
54  
55  
56  
57  
58  
59  
60

1 Teratogenicity) while only small improvements in compliance with contraceptive measures were observed.<sup>17 18</sup>  
2  
3 Apparently, also iPLEDGE does not bring complete security because further restrictive measures as in iPLEDGE  
4  
5 do not seem to improve the results and may add unnecessary burden to the healthcare system since  
6  
7 healthcare professionals and patients need to register and verify information on a monthly basis.<sup>4</sup>  
8  
9

### 10 **Strengths and weaknesses of the study**

11  
12 A strength of this study is that we used a population based design including virtually complete and detailed  
13  
14 drug dispensing data and pregnancy outcome data of a large cohort, which enabled estimating nationwide  
15  
16 isotretinoin exposure rates among pregnant women. A known limitation of using drug dispensing data is that it  
17  
18 does not confirm the actual use of the drug under study and does not provide information on the precise time  
19  
20 window of drug use. In addition, it is likely that women may change or stop their medication use when they  
21  
22 become aware of pregnancy. However, it should be noted that our data show that the majority (80%) of  
23  
24 pregnant women who filled prescriptions for isotretinoin came back for refills, suggesting that they really used  
25  
26 the drug.  
27

28  
29 This study provides no information on spontaneous abortions that occurred until gestational age of 16 weeks  
30  
31 and ETOPs because these data are not captured in the PRN database and these pregnancies were thus not  
32  
33 included in our cohort. This resulted in an underestimation of the number of pregnancies that were potentially  
34  
35 exposed to isotretinoin in the 30 days before or during pregnancy and the adverse fetal and neonatal  
36  
37 outcomes. Studies that estimated the teratogenic risk of isotretinoin using prospectively documented  
38  
39 isotretinoin exposed pregnancies found much higher proportions of pregnancies resulting in spontaneous  
40  
41 abortion, stillbirth or reported congenital malformations i.e. 36% (13 of the 36 fetuses)<sup>3</sup> and 26% (6 of the 23  
42  
43 fetuses)<sup>5</sup>.  
44

45  
46 Without detailed information on drug exposure preferably verified by the patient whether the drug was  
47  
48 actually taken and detailed descriptions of the diagnosed fetal outcome as well as on spontaneous abortions,  
49  
50 the teratogenic risk of isotretinoin could not be accurately estimated. However, the primary aim of this study  
51  
52 was to show that adverse fetal and neonatal outcomes still occur in isotretinoin exposed pregnancies, despite  
53  
54 the implemented PPP. Unfortunately, due to the low number of cases it was not possible to adjust in the  
55  
56 statistical analysis for important confounding factors other than maternal age such as smoking, alcohol intake,  
57  
58 previous pregnancy outcomes and exposure to other potentially teratogenic drugs. Detection bias may also  
59  
60

1 have influenced the incidence and estimated risks of congenital anomalies since more detailed diagnostics  
2 might have been used in pregnancies exposed to isotretinoin compared to the unexposed pregnancies.  
3  
4 Nevertheless, the results of our study are in line with the undisputed embryotoxicity of isotretinoin and  
5  
6 indicate that such events still occur despite the implemented PPP.  
7  
8

### 9 **Implications and future research**

10  
11 In the Netherlands, approximately 180,000 pregnancies are reported annually.<sup>19</sup> When extrapolating the 2.2  
12 (95% CI 1.6 – 2.9) per 10,000 women potentially exposed to isotretinoin during pregnancy to a national level,  
13  
14 there would be 29 to 52 isotretinoin-exposed pregnancies per year yielding unnecessary risks for congenital  
15  
16 anomalies and fetal deaths. Therefore, it is in the interest of public health to implement effective PPPs and  
17  
18 improve these measures or their compliance as much as possible to reduce isotretinoin use during pregnancy  
19  
20 to the lowest possible level.  
21  
22

23  
24 With the present study only the period 1999 to 2007 has been evaluated. The past years in the Netherlands,  
25  
26 the PPP is communicated to healthcare professionals via product information,<sup>20</sup> national general practitioner  
27  
28 (GP) standards on treatment of acne,<sup>21</sup> drug prescription and dispensing systems,<sup>22</sup> the website of the Dutch  
29  
30 Medicines Evaluation Board,<sup>23</sup> and the common (national) literature on drug information.<sup>24</sup> Furthermore,  
31  
32 research on isotretinoin use in the Netherlands and the PPP is conducted and published in (inter)national  
33  
34 scientific medical journals.<sup>7-9 14 25-28</sup> Consequently, data after 2007 are needed to judge if attention for the  
35  
36 isotretinoin PPP during recent years has improved the carefulness with which isotretinoin is prescribed and  
37  
38 dispensed.  
39  
40

### 41 **Conclusions**

42  
43 Although a PPP was implemented almost 15 years ago, we showed that there are still pregnancies exposed to  
44  
45 isotretinoin in the Netherlands which could have been prevented if appropriate exclusion of pregnancy before  
46  
47 isotretinoin initiation would have been performed. Moreover, adverse fetal outcomes were reported among  
48  
49 these pregnancies. These findings from the Netherlands add to the evidence that there is no full compliance to  
50  
51 the isotretinoin PPP in many Western countries. Given the limited success of iPLEDGE, the question is which  
52  
53 further measures are able to improve compliance.  
54  
55  
56  
57  
58  
59  
60



1  
2  
3  
4 **Acknowledgements** The authors would like to thank the Netherlands Perinatal Registry for providing access to  
5  
6 their database and contribution to the manuscript.  
7

8  
9 **Competing interests** All authors have completed the Unified Competing Interest form at  
10 [www.icmje.org/coi\\_disclosure.pdf](http://www.icmje.org/coi_disclosure.pdf) and declare that LH and RH are employees of the PHARMO Institute. This  
11 independent research institute performs financially supported studies for government and related healthcare  
12 authorities and several pharmaceutical companies. MS is leading a research group that sometimes conducts  
13 research for pharmaceutical companies. None related to the submitted work; no other relationships or  
14 activities that could appear to have influenced the submitted work.  
15  
16  
17  
18  
19

20  
21 **Details of contributors** Each author participated actively and sufficiently in this study. IZ, RR, LH, MS and BS  
22 contributed to the study design and the interpretation of the data. IZ and LH collected and analysed the data.  
23 IZ, RR, LH, RH, MS, SS and BS participated in the development and critical review of the manuscript for  
24 important intellectual content and provided final approval of the version to be published. A statement that all  
25 authors, external and internal, had full access to all of the data (including statistical reports and tables) in the  
26 study and can take responsibility for the integrity of the data and the accuracy of the data analysis.  
27  
28  
29  
30  
31  
32

33  
34 **Ethics approval** Not applicable. The research team did not have access to medical records.  
35

36  
37 **Funding** This study was supported by the Drug Safety Unit of the Dutch Inspectorate of Health Care.  
38

39  
40 **Data sharing** No additional data available.  
41

42  
43 **Transparency** The lead author (IZ) affirms that the manuscript is an honest, accurate, and transparent account  
44 of the study being reported; that no important aspects of the study have been omitted; and that any  
45 discrepancies from the study as planned (and, if relevant, registered) have been explained.  
46  
47  
48

49  
50 **Copyright** The Corresponding Author has the right to grant on behalf of all authors and does grant on behalf of  
51 all authors, a worldwide licence to the Publishers and its licensees in perpetuity, in all forms, formats and  
52 media (whether known now or created in the future), to i) publish, reproduce, distribute, display and store the  
53 Contribution, ii) translate the Contribution into other languages, create adaptations, reprints, include within  
54 collections and create summaries, extracts and/or, abstracts of the Contribution, iii) create any other derivative  
55 work(s) based on the Contribution, iv) to exploit all subsidiary rights in the Contribution, v) the inclusion of  
56  
57  
58  
59  
60

1  
2  
3  
4  
5  
6  
7  
8  
9  
10  
11  
12  
13  
14  
15  
16  
17  
18  
19  
20  
21  
22  
23  
24  
25  
26  
27  
28  
29  
30  
31  
32  
33  
34  
35  
36  
37  
38  
39  
40  
41  
42  
43  
44  
45  
46  
47  
48  
49  
50  
51  
52  
53  
54  
55  
56  
57  
58  
59  
60

electronic links from the Contribution to third party material where-ever it may be located; and, vi) licence any third party to do any or all of the above.

**FIGURE LEGENDS**

**Figure 1:** Percentage of isotretinoin dispensings exceeding the maximum duration of 30 days by calendar year

**Figure 2:** Isotretinoin exposed pregnancies per 10,000 pregnancies by calendar year

- Exposed to isotretinoin in 30 days before or during pregnancy
- - - - Exposed to isotretinoin during pregnancy

For peer review only

## References

1. European Medicines Agency (EMA). Annex I of the Summary information on a referral opinion following an arbitration pursuant to article 29 of directive 2001/83/EC for isotretinoin. 2003; Accessed 2 May 2013:[http://www.ema.europa.eu/docs/en\\_GB/document\\_library/Referrals\\_document/Isotretinoin\\_29/WC500010881.pdf](http://www.ema.europa.eu/docs/en_GB/document_library/Referrals_document/Isotretinoin_29/WC500010881.pdf)
2. Rosa FW. Teratogenicity of isotretinoin. *Lancet* 1983;2(8348):513.
3. Lammer EJ, Chen DT, Hoar RM, et al. Retinoic acid embryopathy. *N Engl J Med* 1985;313(14):837-41.
4. Abroms L, Maibach E, Lyon-Daniel K, Feldman SR. What is the best approach to reducing birth defects associated with isotretinoin? *PLoS Med* 2006;3(11):e483.
5. Schaefer C, Meister R, Weber-Schoendorfer C. Isotretinoin exposure and pregnancy outcome: an observational study of the Berlin Institute for Clinical Teratology and Drug Risk Assessment in Pregnancy. *Arch Gynecol Obstet* 2010;281(2):221-7.
6. Autret-Leca E, Kreft-Jais C, Elefant E, et al. Isotretinoin exposure during pregnancy: assessment of spontaneous reports in France. *Drug Saf* 2010;33(8):659-65.
7. Crijns I, Straus S, Luteijn M, et al. Implementation of the harmonized EU isotretinoin Pregnancy Prevention Programme: a questionnaire survey among European regulatory agencies. *Drug Saf* 2012;35(1):27-32.
8. Teichert M, Visser LE, Dufour M, R et al. Isotretinoin use and compliance with the Dutch Pregnancy Prevention Programme: a retrospective cohort study in females of reproductive age using pharmacy dispensing data. *Drug Saf* 2010;33(4):315-26.
9. Crijns HJ, van Rein N, Gispen-de Wied CC, et al. Prescriptive contraceptive use among isotretinoin users in the Netherlands in comparison with non-users: a drug utilisation study. *Pharmacoepidemiol Drug Saf* 2012;21(10):1060-6.
10. Herings RM, Bakker A, Stricker BH, et al. Pharmaco-morbidity linkage: a feasibility study comparing morbidity in two pharmacy based exposure cohorts. *J Epidemiol Community Health* 1992;46(2):136-40.
11. WHO Collaborating Centre for Drug Statistics Methodology. Anatomical Therapeutic Chemical (ATC) index with Defined Daily Doses (DDDs). Accessed 4 October 2013:[http://www.whocc.no/atc\\_ddd\\_index/](http://www.whocc.no/atc_ddd_index/)
12. Stichting Perinatale Registratie Nederland. *Grote Lijnen 10 jaar Perinatale Registratie Nederland*. Utrecht: Stichting Perinatale Registratie Nederland, 2011.
13. Houweling LM, Bezemer ID, Penning-van Beest FJ, et al. First year of life medication use and hospital admission rates: premature compared with term infants. *J Pediatr* 2013;163(1):61-6 e1.
14. Crijns I, Mantel-Teeuwisse A, Bloemberg R, et al. Healthcare professional surveys to investigate the implementation of the isotretinoin Pregnancy Prevention Programme: a descriptive study. *Expert Opin Drug Saf* 2013;12(1):29-38.
15. Berard A, Azoulay L, Koren G, et al. Isotretinoin, pregnancies, abortions and birth defects: a population-based perspective. *Br J Clin Pharmacol* 2007;63(2):196-205.
16. Bensouda-Grimaldi L, Jonville-Bera AP, Mouret E, et al. Isotretinoin: compliance with recommendations in childbearing women. *Ann Dermatol Venereol* 2005;132(5):415-23.
17. Pinheiro SP, Kang EM, Kim CY, et al. Concomitant use of isotretinoin and contraceptives before and after iPledge in the United States. *Pharmacoepidemiol Drug Saf* 2013;22(12):1251-7.
18. Shin J, Cheetham TC, Wong L, et al. The impact of the iPLEDGE program on isotretinoin fetal exposure in an integrated health care system. *J Am Acad Dermatol* 2011;65(6):1117-25.
19. Stichting Perinatale Registratie Nederland. *Grote Lijnen 1999 - 2012*. Utrecht: Stichting Perinatale Registratie Nederland, 2013.
20. Roaccutane Summary of Product Characteristics. Accessed 3 January 2014:<http://db.cbg-meb.nl/IB-teksten/h10305.pdf>
21. Smeets JG GS, Bruinsma, et al. NHG-standard acne. *Huisarts wet* 2007;50:259-68.
22. Implementatie Bijzonder Kenmerk: 'Let op zwangerschapspreventieprogramma' in Z-index. 2009; Accessed 3 March 2014:<https://www.z-index.nl/g-standaard/beschrijvingen/functioneel/wijzigingen/mb/bijzondere-kenmerken/IR%20BK%20Zwangerschapspreventieprogramma%20V-1-1-1.pdf>
23. College ter Beoordeling van Geneesmiddelen / Medicines Evaluation Board (CBG/MEB). Zwangerschapspreventie programma's (ZPP). Accessed 3 March 2014:<http://www.cbg-meb.nl/CBG/nl/humane-geneesmiddelen/geneesmiddelenbew/zwangerschapspreventieprogramma/default.htm>
24. Commissie Farmaceutische Hulp. Isotretinoïne: waarschuwingen en voorzorgen. . *Farmacotherapeutisch kompas. College van Zorgverzekeringen* 2007.
25. Crijns HJ, Straus SM, Gispen-de Wied C, et al. Compliance with pregnancy prevention programmes of isotretinoin in Europe: a systematic review. *Br J Dermatol* 2011;164(2):238-44.

1  
2  
3  
4  
5  
6  
7  
8  
9  
10  
11  
12  
13  
14  
15  
16  
17  
18  
19  
20  
21  
22  
23  
24  
25  
26  
27  
28  
29  
30  
31  
32  
33  
34  
35  
36  
37  
38  
39  
40  
41  
42  
43  
44  
45  
46  
47  
48  
49  
50  
51  
52  
53  
54  
55  
56  
57  
58  
59  
60

26. Fledderus S. Zwangerschapspreventie bij teratogene middelen faalt. *Medisch Contact*, 2012;48.  
27. Manders KC, de Vries LC, Roumen FJ. Pregnancy after isotretinoin use. *Ned Tijdschr Geneesk* 2013;157(41):A6567.  
28. Crijns HJ. Teratogene middelen: zwangerschapspreventie kan beter. *Pharmaceutisch Weekblad (PW)*, 2012;October.

For peer review only

1  
2  
3  
4  
5 **Isotretinoin exposure during pregnancy: a population-based study in the Netherlands**  
6  
7

8 Inge M Zomerdijk, Rikje Ruiter, Leanne MA Houweling, Ron MC Herings, Miriam CJM Sturkenboom, Sabine  
9 MJM Straus, Bruno H Stricker  
10

11  
12 Department of Medical Informatics, Erasmus University Medical Center, Dr. Molewaterplein 50, 3015 GE,  
13 Rotterdam, The Netherlands Inge M Zomerdijk  
14

15 PhD candidate

16 Internal medicine, GHZ, Bleulandweg 10, 2803 HH, Gouda, the Netherlands Rikje Ruiter  
17 medical doctor  
18

19 PHARMO Institute for Drug Outcomes Research, Van Deventerlaan 30-40, 3528 AE Utrecht, The Netherlands

20 Leanne MA Houweling

21 business development manager

22 PHARMO Institute for Drug Outcomes Research, Van Deventerlaan 30-40, 3528 AE Utrecht, The Netherlands

23 Ron MC Herings

24 director  
25

26 Department of Medical Informatics, Erasmus University Medical Center, Dr. Molewaterplein 50, 3015 GE,  
27 Rotterdam, The Netherlands Miriam CJM Sturkenboom  
28

29 professor

30 Department of Medical Informatics, Erasmus University Medical Center, Dr. Molewaterplein 50, 3015 GE,  
31 Rotterdam, The Netherlands Sabine MJM Straus  
32

33 associate professor

34 Department of Epidemiology, Erasmus University Medical Center, Dr. Molewaterplein 50, 3015 GE, Rotterdam,  
35 The Netherlands Bruno H Stricker  
36

37 professor  
38  
39

40 Correspondence to: Bruno H Stricker [b.stricker@erasmusmc.nl](mailto:b.stricker@erasmusmc.nl)

41 Department of Epidemiology, Erasmus University Medical Centre, P.O. Box 2040, 3000 CA Rotterdam, The  
42 Netherlands.  
43  
44

45 key words: isotretinoin, pregnancy prevention programme, teratogens, congenital malformations  
46  
47

48 Word count: 3580 words  
49  
50  
51  
52  
53  
54  
55  
56  
57  
58  
59  
60

## ABSTRACT

**Objective** To estimate isotretinoin exposure in Dutch pregnant women despite the implemented pregnancy prevention programme (PPP) and secondly, to analyse the occurrence of congenital anomalies and adverse fetal death or neonatal outcomes in these isotretinoin exposed pregnancies.

**Design** Population based study

**Setting** the Netherlands

**Participants** a cohort of 203,962 pregnancies with onset between 1 January 1999 and 1 September 2007 consisting of 208,161 fetuses (including multiple births) or neonates.

**Main outcome measures** Isotretinoin exposure in the 30 days before or during the first, second or third trimester of pregnancy. The occurrence Proportions of adverse fetal or neonatal outcomes, defined as intrauterine deaths  $\geq$  16 week of fetal death gestation and fetus/neonates with major congenital anomalies. Odds ratios (ORs) with 95% confidence intervals (CI) adjusted for maternal age were calculated to estimate the risk of congenital anomalies and adverse fetal death or neonatal outcome after maternal isotretinoin exposure.

**Results** 4551 pregnancies, 2.24 (95%CI 1.639 to 3.3) per 10,000 pregnancies, were exposed to isotretinoin despite the pregnancy prevention programme. 45 of these pregnancies, 2.932 (95%CI 1.6 to 2.9) per 10,000 pregnancies, were exposed to isotretinoin during pregnancy. Sixty and six additional women became pregnant within 30 days after isotretinoin discontinuation. In sixty percent of isotretinoin exposed pregnancies, women started isotretinoin when/while already pregnant. Among In five out of the 51 isotretinoin exposed pregnancies, the proportion of 9.4% (95%CI 1.3 to 17.6), had an adverse fetal death or congenital anomalies was 6.4% (1.7 to 16.4) and the or neonatal outcome. The OR for any congenital anomaly or adverse fetal death was 1.48 (or neonatal outcomes after isotretinoin exposure in 30 days before or during pregnancy was 2.3 (95%CI 0.469 to 4.775.7) after adjustment for maternal age. For fetal death, the adjusted OR was 4.00 (1.25 to 12.91) and for congenital anomalies 0.70 (0.10 to 5.06). The risk was highest with exposure to isotretinoin during 30 days before conception or during the first trimester with an adjusted OR of 3.64 (1.41 to 9.39) for any congenital anomaly or fetal death.

**Conclusions** Although a pregnancy prevention programme PPP was already implemented in 1988, we showed that isotretinoin exposed pregnancies in the Netherlands and adverse fetal and neonatal events still occur. These findings from the Netherlands add to the evidence that there is no full compliance to the isotretinoin

1  
2  
3  
4  
5 PPP in many Western countries. Given the limited success of iPLEDGE, the question is which further measures  
6 are able to improve compliance. still pregnancies exposed to isotretinoin in the Netherlands and moreover, we  
7 showed that in these exposed pregnancies there was an elevated risk of congenital anomalies and fetal death.  
8  
9  
10  
11  
12  
13  
14  
15  
16  
17  
18  
19  
20  
21  
22  
23  
24  
25  
26  
27  
28  
29  
30  
31  
32  
33  
34  
35  
36  
37  
38  
39  
40  
41  
42  
43  
44  
45  
46  
47  
48  
49  
50  
51  
52  
53  
54  
55  
56  
57  
58  
59  
60

For peer review only

**ARTICLE SUMMARY****Strengths and limitations of this study**

- This is the first population-based study in the EU on isotretinoin exposure during pregnancy in a large cohort of more than 200,000 pregnancies ~~with virtual complete and detailed drug dispensing and pregnancy outcome data~~ which enabled ~~calculating accurate estimating~~ isotretinoin exposure rates among pregnant women and ~~assessment of pregnancy outcomes its consequences on a nationwide scale.~~
- ~~Statistical analysis should be interpreted with caution because the absolute number of isotretinoin exposed pregnancies was small.~~
- ~~Our results might even underestimate the actual isotretinoin exposed pregnancies because pregnancies that ended in a spontaneous or elective abortion~~ ~~From the virtually complete and detailed drug dispensing data, isotretinoin exposure could only be estimated since drug dispensing data does not ascertain actual drug use and precise exposure intervals. However, patients coming for refills are usually taking their drug.~~
- ~~Spontaneous abortions~~ before gestational age of 16 weeks ~~and elective abortions~~ were not included in our cohort ~~and therefore our results probably underestimate the number of isotretinoin exposed pregnancies and its consequences.~~
- ~~The analysis was restricted to adverse fetal and neonatal outcomes in general since specific teratogenic risk could not be estimated with data lacking information on pregnancies until 16 weeks of gestation and lacking detailed descriptions of adverse fetal and neonatal outcomes.~~



## INTRODUCTION

Isotretinoin, a vitamin A derivative, is licensed in the European Union (EU) since 1983 and is indicated for systemic treatment of severe acne (such as nodular or conglobate acne or acne at risk of permanent scarring) in patients resistant to adequate courses of standard therapy with systemic antibacterials and topical therapy.<sup>1</sup>

~~However, the~~The teratogenic potential is ~~a known major adverse effect~~an important characteristic of ~~treatment with~~ isotretinoin. Animal studies already suggested teratogenic effects in humans and isotretinoin has been contraindicated for use during pregnancy since the very beginning of the marketing authorisation. Despite this contraindication, the first cases of congenital anomalies after isotretinoin use during pregnancy were documented already in 1983.<sup>2</sup> ~~Systemic isotretinoin exposure during the first 10 weeks of pregnancy leads to congenital anomalies in approximately 26% of live births~~As described by Lammer et al. in 1985, ~~isotretinoin~~ ~~embryopathy~~ consists of craniofacial, cardiac, thymic and central nervous system (CNS) defects.<sup>3</sup> ~~They found a relative risk of 26 for this group of major congenital malformations after systemic isotretinoin exposure during some parts of the first 10 weeks after conception.~~<sup>3</sup> ~~Elective termination of pregnancy (ETOP) was decided in more than 50% of exposed pregnancies and 20% of the remaining pregnancies ended in a first trimester spontaneous abortion.~~<sup>3</sup> ~~Exposure beyond the first 10 weeks of pregnancy can cause developmental delays and other CNS effects in approximately 40% of live births.~~<sup>4,5</sup> ~~Furthermore, spontaneous abortion was observed in 7-20% of isotretinoin exposed pregnancies and elective termination of pregnancies occurred in more than 50% of exposed pregnancies.~~<sup>3,4</sup>

Reports of congenital anomalies after isotretinoin use accumulated and consequently, in 1988 the marketing authorisation holder of isotretinoin implemented a ~~world-wide~~ Pregnancy Prevention Programme (PPP) ~~world-wide~~ to better prevent pregnancies among systemic isotretinoin users.<sup>6,4</sup> The PPP included an educational programme for prescribers and patients including material to be used in counselling women about the need to prevent pregnancy while taking isotretinoin. Conditions for prescribing included a negative pregnancy test, the use of reliable contraception and a signed patient consent form.<sup>6,4</sup> In 2003, a review of isotretinoin by the European Medicine Agency (EMA) resulted in a compulsory European harmonised PPP for all isotretinoin containing products.<sup>1</sup> The elements of the European wide PPP are listed in box 1.

### Box 1: Elements of the EU isotretinoin PPP

1. Isotretinoin is contraindicated in pregnant women and should only be initiated in women of reproductive age who understand the teratogenic risk and the need for regular follow-up
2. Use of effective contraceptive measures from four weeks before isotretinoin initiation until four weeks after treatment discontinuation. At least one and preferably two complementary forms of contraception including a barrier method should be used.

1  
2  
3  
4  
5  
6  
7  
8  
9  
10  
11  
12  
13  
14  
15  
16  
17  
18  
19  
20  
21  
22  
23  
24  
25  
26  
27  
28  
29  
30  
31  
32  
33  
34  
35  
36  
37  
38  
39  
40  
41  
42  
43  
44  
45  
46  
47  
48  
49  
50  
51  
52  
53  
54  
55  
56  
57  
58  
59  
60

3. Pregnancy testing should be done before, during and five weeks after discontinuation of isotretinoin
  4. Isotretinoin should only be prescribed by or under the supervision of a physician with experience in the use of systemic retinoids
  5. Prescription should be limited to 30 days of treatment and continuation of treatment requires a new prescription.
  6. Dispensing of isotretinoin should occur within a maximum of seven days after prescription.
  7. Educational programmes for healthcare professionals including prescribers and pharmacists, and patients are in place to inform them about the teratogenic risk and to create awareness of the PPP.
- 

The safe use of isotretinoin in women of reproductive age is in the interest of public health because of the potential risk of spontaneous and elective abortions, and, more importantly, children with major congenital anomalies require continuous healthcare throughout their life. Although a PPP has been implemented in the EU, pregnancies during isotretinoin therapy still occur.<sup>78,6</sup> The regulatory authorities of sixteen EU member states responded in 2009 to a survey that isotretinoin exposed pregnancies have occurred in their country.<sup>97</sup> A French study between 2003 and 2006 estimated a pregnancy rate from 0.4 to 1.2 per 1000 female isotretinoin users within reproductive age.<sup>86</sup> Studies in the Netherlands observed that only 52% to 59% of the female isotretinoin users of reproductive age used concomitant hormonal contraceptives, which was higher than the 39%-46% observed in the general female population of similar age, but lower than anticipated.<sup>10-118,9</sup> Although these studies show limited compliance with the isotretinoin PPP, it is not known whether isotretinoin exposure also occurs during pregnancy and what the outcome of these pregnancies is. Therefore, the objective of our study was to estimate isotretinoin exposure in Dutch pregnant women despite the implemented PPP and secondly, to analyse the occurrence of congenital anomalies and adverse fetal death and neonatal outcomes in these isotretinoin exposed pregnancies.

## METHODS

### Data sources

For this population based study a cohort of 203,962 pregnancies consisting of 208,161 fetuses was constructed using a linkage between the PHARMO Database Network and the Netherlands Perinatal Registry (PRN). The PHARMO Database Network is a dynamic population-based cohort including, amongst other information, drug-dispensing records from community pharmacies for more than 3 million individuals in the Netherlands (approximately 20% of the Dutch population) that are collected since 1986.<sup>110</sup> The drug dispensing data contain the following information per prescription: the Anatomical Therapeutic Chemical (ATC) classification of the drug, dispensing date, regimen, quantity dispensed and estimated length of duration of use.<sup>111</sup> The PRN is a nationwide registry that contains linked and validated data from four databases: the national obstetric

1  
2  
3  
4  
5 database for midwives (LVR-1), the national obstetric database for gynaecologists (LVR-2), the national  
6  
7 obstetric database for general practitioners (LVR-h) and the national neonatal/paediatric database (LNR).<sup>4412</sup>  
8  
9 The registry contains information about care before, during, and after delivery as well as maternal and  
10  
11 neonatal characteristics and outcome of 95% of 180,000 pregnancies annually in the Netherlands with a  
12  
13 gestational age of at least 16 weeks. The PRN includes information on pregnancy outcome including congenital  
14  
15 anomalies detected during pregnancy, at birth or within the first year after birth. The probabilistic linking  
16  
17 method between PHARMO and PRN has been described in detail elsewhere but was generally based on the  
18  
19 birth date of the mother and fetus child and their postal zip codes.<sup>4513</sup> To be included in the cohort the mother  
20  
21 should be registered in the community pharmacy database of PHARMO during the whole pregnancy. The  
22  
23 startdate of pregnancyconception was estimated based on the last menstrual period or ultrasound, as recorded  
24  
25 in the PRN, and was truncated to full weeks.

#### 26 27 Isotretinoin dispensings

28  
29 All dispensings for systemic (oral) isotretinoin (ATC D10BA01) filled in community pharmacies by women  
30  
31 included in our cohort within the 12-months period before or during pregnancy were extracted from the  
32  
33 PHARMO Database Network. Considering a daily dosage of 0.5 mg-1mg per kilogram daily,<sup>1</sup> isotretinoin  
34  
35 prescriptions dispensed on the same day were pooledassumed to be used simultaneously and therefore these  
36  
37 dispensings were pooled and considered as one dispensing (e.g. the prescriptions of a 10 mg and 20 mg tablet  
38  
39 to result intablets dispensed at the same time to reach a daily dosage of 30mg were pooled). The length of all  
40  
41 For each isotretinoin dispensings-dispensing, the length of the dispensing was calculated by dividing the total  
42  
43 number of prescribed units by the number of units (doses) to be taken per day. In case the pooledisotretinoin  
44  
45 dispensings that were pooled together had different lengths in case every other day different strengths  
46  
47 should be taken-, the length of the single dispensing with the longest duration was taken (i.e. one day 20 mg  
48  
49 tablet, the other day 20 mg and 10 mg tablet)-used. To assess compliance with the PPP, we calculated the  
50  
51 proportion of dispensings that exceeded 30 days, which is the maximum length according to the EU PPP.

#### 52 53 Drug exposure interval

54  
55 For all pregnancies (n=203,962) >16 weekswith of gestational age of at least 16 weeks included in the cohort,  
56  
57 isotretinoin exposure before and during pregnancy was determinedestimated based on isotretinoin dispensing  
58  
59 data (ATC D10BA01) filled by the mother during the 12-months period before and during pregnancy. Exposure  
60  
61 in person time (days) was calculated by dividing the total number of prescribed units by the number of

1  
2  
3  
4  
5 prescribed units per day. Isotretinoin exposure periods were defined considering a possible ~~overlapping period~~  
6 ~~but gaps~~ ~~overlap of isotretinoin dispensings~~. ~~Gaps, isotretinoin free periods~~ between two isotretinoin  
7 dispensings, were not permitted ~~in one meaning that an isotretinoin exposure period ends once an isotretinoin~~  
8 ~~free period~~. ~~was identified~~. Using the start and end date of the isotretinoin ~~exposure period~~, the number of  
9 days exposed ~~during pregnancy~~ was estimated for the following exposure ~~windows~~ ~~intervals~~: 30 days before  
10 conception, first 90 days of gestation (first trimester), day 90-179 of gestation (second trimester) and day 180 –  
11 delivery (third trimester). In addition, the entire period 30 days before pregnancy until delivery as well as the  
12 period from 30 days before till the end of the first trimester were analysed separately.

### 13 14 15 **~~Pregnancy~~ ~~Adverse fetal or neonatal~~ outcomes**

16  
17 For each fetus (n=208,161), we determined whether ~~congenital anomalies or adverse fetal death was or~~  
18 ~~neonatal outcomes were~~ reported. ~~Fetal death was~~ ~~Adverse fetal or neonatal outcomes were~~ defined as ~~death~~  
19 ~~before complete expulsion or extraction from the mother~~.<sup>46</sup> ~~Congenital all intrauterine deaths ≥ 16 week of~~  
20 ~~gestation and live born infants with major congenital anomalies~~. If possible, ~~congenital~~ anomalies were  
21 categorised into nine sub-groups: abdominal wall and skin disorders; cardiovascular defects; defects in the  
22 digestive system; defects in the nervous system; musculoskeletal defects; respiratory defects; urogenital  
23 defects; multiple, syndrome or chromosomal anomalies; or other congenital malformations. ~~Description of the~~  
24 ~~classification system for congenital anomalies used in our study are presented in the supplementary~~  
25 ~~information Table S1. As we were interested in those congenital anomalies~~ ~~As we were interested in adverse~~  
26 ~~fetal outcomes~~ potentially induced by maternal drug exposure, chromosomal anomalies were ~~excluded~~ ~~not~~  
27 ~~considered as an adverse outcome in the analyses~~.

### 28 29 30 **Analysis**

31  
32 The dispensing rate of isotretinoin among the pregnant women included in our study was calculated and  
33 ~~stratified per~~ ~~Potential~~ exposure ~~period~~. ~~Exposure to isotretinoin in the 30 days before or during pregnancy was~~  
34 ~~calculated~~ per 10,000 pregnancies ~~was calculated~~ for the aforementioned exposure ~~periods~~ ~~intervals~~ including  
35 their 95% confidence intervals (95% CIs). ~~The proportions of adverse fetal outcome among isotretinoin exposed~~  
36 ~~and unexposed fetuses or neonates were calculated including their 95% CIs~~. We used multiple logistic  
37 regression models to calculate odds ratios (ORs) and 95% CIs to estimate associations between ~~congenital~~  
38 ~~anomalies~~, ~~adverse fetal death~~ ~~or neonatal outcome~~ and maternal isotretinoin exposure. We adjusted for  
39 maternal age at conception (<20, 20-24, 25-29, 30-34, ≥35), and if possible also for calendar time (year of  
40  
41  
42  
43  
44  
45  
46  
47  
48  
49  
50  
51  
52  
53  
54  
55  
56  
57  
58  
59  
60

conception) and gender of the infant. Analyses for specific congenital anomalies were performed when > 3 cases were observed. The t-test or Fisher exact test was used to derive p-values when comparing continuous or categorical variables between study groups. Statistical significance was assumed for two-sided p-values <0.05. Statistical analyses were performed using SAS version 9.2 (SAS Institute, Cary, North Carolina).

## RESULTS

Between 1 January 1999 and 1 September 2007 in the Netherlands, a total of 203,962 pregnancies corresponding to 208,161 fetuses (including multiple births) were included in our study. The mean maternal age at conception was 30.3 years (SD 4.6) and mean duration of pregnancy was 39 weeks and 3 days (SD 19 days). [Demographics for isotretinoin exposed and unexposed pregnancies are presented in table 1.](#)

### Isotretinoin dispensings

A total of 416 isotretinoin dispensings to 130 of the 203,962 women in the 12-months period before or during pregnancy were identified. In 139 of the 416 isotretinoin dispensings (33.4%), the dispensing consisted of > 30 days of isotretinoin use. Figure 1 shows that the percentage of isotretinoin dispensings in the year before or during pregnancy exceeding the maximum duration of 30 days decreased over calendar time from 50% in 2001 to 13% in 2007.

### Isotretinoin exposed pregnancies

[Demographics for isotretinoin exposed and unexposed pregnancies are presented in table 1.](#)

**Table 1:** Description of the study population

|                                                          | Isotretinoin exposed*       | Isotretinoin unexposed                                                      | p-value |
|----------------------------------------------------------|-----------------------------|-----------------------------------------------------------------------------|---------|
| <i>Pregnancies (N=203,962)</i>                           | 51                          | 203,911                                                                     |         |
| Mean (±SD) maternal age at conception in years (95% CI)  | 29.1 (4.9)<br>(27.8 – 30.5) | 30.3 (4.7)<br>(30.3 – 30.3)                                                 | 0.56    |
| Mean (±SD) gestational age at delivery in weeks (95% CI) | 39 (25 days)<br>(38 – 40)   | 39, 3 days (19 days)<br>(39 <sub>-2</sub> 3 days – 39 <sub>+2</sub> 3 days) | 0.33    |
| <i>Fetuses (N=208,161)</i>                               | 53                          | 208,108                                                                     |         |
| Gender (boy %)                                           | 47.2%<br>(33.3 – 61.1)      | 51.5%<br>(51.3 – 51.7)                                                      | 0.53    |
| <i>Maternal age at conception in years, n, column %.</i> |                             |                                                                             | 0.37    |
| < 20 years of age                                        | 2 (3.8%)                    | 4,063 (2.0%)                                                                |         |
| ≥ 20 -25 years of age                                    | 7 (13.2%)                   | 22,144 (10.6%)                                                              |         |
| ≥ 25 -30 years of age                                    | 21 (39.6%)                  | 68,366 (32.9%)                                                              |         |
| ≥ 30 -35 years of age                                    | 14 (26.4%)                  | 81,581 (39.2%)                                                              |         |
| ≥ 35 years of age                                        | 9 (17.0%)                   | 31,951 (15.4%)                                                              |         |

| Gestational age at delivery, n, column %.  |                           |                                  | 0.64        |
|--------------------------------------------|---------------------------|----------------------------------|-------------|
| < 27 weeks                                 | 1 (1.9%)                  | 2,198 (1.1%)                     |             |
| 27 - 30 weeks                              | 1 (1.9%)                  | 1,167 (0.6%)                     |             |
| 31-33 weeks                                | 0 (0.0%)                  | 2,008 (1.0%)                     |             |
| 34-36 weeks                                | 3 (5.7%)                  | 7,126 (3.4%)                     |             |
| 37-39 weeks                                | 12 (22.6%)                | 50,854 (24.4%)                   |             |
| >40 weeks                                  | 36 (67.9%)                | 144,755 (69.5%)                  |             |
| <b>Fetal death or congenital anomalies</b> | <b>5;</b>                 | <b>9,041;</b>                    | <b>0.08</b> |
| <b>Adverse fetal outcome, n;% (95% CI)</b> | <b>9.4% (1.3 -17.6)</b>   | <b>4.3% (4.3 – 4.4)</b>          |             |
| <b>Fetal death, n; % (95% CI)</b>          | <b>3; 5.7% (0 – 12.1)</b> | <b>3,404; 1.6% (1.6 – 1.7)</b>   | <b>0.06</b> |
| <b>Congenital anomalies, n;% (95% CI)</b>  | <b>3; 5.7% (0 – 12.1)</b> | <b>6,246; 3.0% (2.93 – 3.07)</b> | <b>0.21</b> |

\*including 45 isotretinoin exposed pregnancies and 6 pregnancies occurred within 30 days after isotretinoin discontinuation\*in the 30 days before conception or during pregnancy

Overall, 45 pregnant women 51 pregnancies, 2.245 (95% CI 1.63 – 2.939 to 3.3) per 10,000 pregnancies, were potentially exposed to isotretinoin in the 30 days before conception or during pregnancy, despite the implemented pregnancy prevention programme. Forty-five pregnant women, 2.2 (95% CI 1.6 – 2.9) per 10,000 pregnancies, were estimated to be exposed to isotretinoin during pregnancy of whom 27 (60%) started isotretinoin treatment while already being pregnant. In 18 pregnancies (40%), the conception occurred during isotretinoin treatment. Six additional pregnancies were identified within one month after isotretinoin discontinuation and were estimated to be exposed only before conception. In 40 out of 203,962 pregnancies, 1.962.0 (95% CI 1.424 – 2.646) per 10,000 pregnancies, an isotretinoin prescription was filled during pregnancy. Thirty two of these 40 pregnant women and 32 pregnancies, 1.6 (95% CI 1.1 – 2.2) per 10,000 pregnancies, received isotretinoin more than once during pregnancy. The number of isotretinoin dispensings per pregnancy ranged from 1 to 7, with a median of 2.50–5. The estimated isotretinoin exposure per exposure interval is presented in table 2.

**Table 2: Potential isotretinoin exposed pregnancies and fetuses per exposure period**

| Isotretinoin exposure period/interval*                               | Exposed pregnancies (N=203,962) | Exposed pregnancies per 10,000 pregnancies (N, 95% CI) | Median number of days exposed per pregnancy (range) | Fetuses (N=208,161) | Fetuses with congenital anomalies or fetal death (N=53)** |
|----------------------------------------------------------------------|---------------------------------|--------------------------------------------------------|-----------------------------------------------------|---------------------|-----------------------------------------------------------|
| 30 days before conception (30 days period)                           | 23                              | 1.13 (0.73 – 1.67)                                     | 24 (range 3 – 30)                                   | 23                  | 5; 21.74% (8.43 – 41.80)                                  |
| 1 <sup>st</sup> trimester (90 days period)                           | 28                              | 1.37 (0.93 – 1.96)                                     | 31 (range 3 – 88)                                   | 28                  | 3; 10.71% (2.80 – 2.65)                                   |
| 2 <sup>nd</sup> trimester (90 days period)                           | 25                              | 1.23 (0.81 – 1.78)                                     | 57 (range 1 – 90)                                   | 26                  | 2; 7.69% (1.31 – 23.16)                                   |
| 3 <sup>rd</sup> trimester (90-103 days period)                       | 26                              | 1.28 (0.85 – 1.84)                                     | 62 (range 1 – 103)                                  | 28                  | 2; 7.14% (1.22 – 21.65)                                   |
| During pregnancy (270 days period)                                   | 45                              | 2.21 (1.63 – 2.93)                                     | 63 (range 3 – 236)                                  | 47                  | 3; 6.38% (1.65 – 16.39)                                   |
| 30 days before or during pregnancy (300 days period)                 | 51                              | 2.50 (1.88 – 3.26)                                     | 63 (range 7 – 236)                                  | 53                  | 5; 9.43% (3.54 – 19.68)                                   |
| 30 days before or during 1 <sup>st</sup> trimester (120 days period) | 35                              | 1.72 (1.24 – 2.36)                                     | 32 (range 7 – 114)                                  | 35                  | 5; 14.29% (5.43 – 28.86)                                  |

CI=Confidence interval.

\*Categories are not mutually exclusive but indicate the number of pregnancies exposed to isotretinoin during that exposure interval/period

\*\*51 pregnancies corresponded to 53 infants including two multiple births

Among the pregnancies estimated to be exposed to isotretinoin during pregnancy (n=45), the number of exposed days during pregnancy ranged from 3 to 236 days with a median of 63 days. Figure 2 shows that the number of women estimated to be exposed to isotretinoin during pregnancy was the highest in 2006 with 3.48 exposed pregnancies (95% CI 1.707 – 6.394) per 10,000 pregnancies.

#### Pregnancy Adverse fetal or neonatal outcomes

Independent of isotretinoin exposure, adverse fetal or neonatal outcomes were observed for 9,046 of the 208,161 fetuses (4.354%, 95% CI 4.26 – 4.43) fetal death or a congenital anomaly excluding chromosomal anomalies was reported in the PRN-3 – 4.4). The proportion of fetal death was 1.64% (95% CI 1.58 – 1.69) and 3.00% (95% CI 2.93 – 3.08) for congenital anomalies.

The 451 pregnancies potentially exposed to isotretinoin in 30 days before conception or during pregnancy corresponded to 4753 fetuses. Among or neonates including two multiple births. Five of these 47 fetuses, three were identified, all singletons, had an adverse fetal or neonatal outcome (9.4% [95% CI 3.5 – 19.7]). deaths or had congenital anomalies (6.38%, 95% CI 1.65 – 16.39). The proportion of fetal death (n=3) and congenital anomalies (n=1) was 6.38% (95% CI 1.65 – 16.39) and 2.13% (95% CI 0.11 – 10.04) respectively. Considering also the six pregnancies that occurred within one month after isotretinoin discontinuation, a total

of five out of 53 fetus (9.43%, 95% CI 3.54 – 19.68) were identified as fetal death (n=2) or had a congenital anomaly (n=3). The isotretinoin exposed fetal deaths and These included three intrauterine deaths and two live born infants born with congenital anomalies in different major congenital anomalies (see table 3). Among those potentially exposed during pregnancy only (n=47), 6.4% (95% CI 1.7 – 16.4) had an adverse fetal or neonatal outcome. The odds ratio (OR) for adverse fetal or neonatal outcome after potential isotretinoin exposure period are presented in the 30 days before or during pregnancy was 2.3 (95% CI 0.9 – 5.7) after adjustment for maternal age (see table 3). Restricting the analysis to the potential isotretinoin exposure during pregnancy, the adjusted OR of an adverse fetal outcome was 1.5 (95% CI 0.5 – 4.8). The number of cases was too low to allow for adjustments in table 2-addition to maternal age. The adjusted OR of any fetal or neonatal outcome was significantly increased at 3.6 (95%CI 1.4-9.4) for isotretinoin exposure during the 30 days before or first trimester of pregnancy. For isotretinoin exposure during pregnancy, the odds ratio (OR) for any congenital anomaly or fetal death was 1.48 (95% CI 0.46 – 4.77) after adjustment for maternal age (see table 3). Considering the same exposure window, for fetal death, the adjusted OR was 4.00 (95% CI 1.25 – 12.91) and for congenital anomalies 0.70 (95% CI 0.10 – 5.06). The number of cases were too low to allow for adjustments in addition to maternal age. Adding the 30 days before conception to the exposure window (exposure 30 days before or during pregnancy), the adjusted OR for any congenital anomaly or fetal death was 2.28 (95% CI 0.91 – 5.72). A significantly increased OR of 3.64 (95% CI 1.41 – 9.39) was observed for any congenital anomaly or fetal death and isotretinoin exposure within 30 days before or first trimester of pregnancy.

**Table 3:** Odds ratios for adverse fetal and neonatal outcomes and isotretinoin exposure in 30 days before or during pregnancy

| Isotretinoin exposed fetuses                             | Exposed fetuses with adverse outcomes | OR (95% CI)               | Adjusted OR* (95% CI)     |
|----------------------------------------------------------|---------------------------------------|---------------------------|---------------------------|
| <u>During pregnancy (N=47)</u>                           | 3†                                    | <u>1.5</u><br>(0.5 – 4.8) | <u>1.5</u><br>(0.5 – 4.8) |
| <u>30 days before or during pregnancy (N=53)</u>         | 5‡                                    | <u>2.3</u><br>(0.9 – 5.8) | <u>2.3</u><br>(0.9 – 5.7) |
| <u>30 days before or 1<sup>st</sup> trimester (N=35)</u> | 5‡                                    | <u>3.7</u><br>(1.4 – 9.5) | <u>3.6</u><br>(1.4 – 9.4) |

CI=confidence interval

\* maternal age in categories (<20, 20-24, 25-29, 30-34, ≥35)

† Includes three intrauterine deaths.

1) in week 19, potentially exposed first 29 days following conception;

2) in week 35, potentially exposed 10 weeks following conception and from week 18 until week 32;

3) in week 38, also reported an unspecified septal defect; potentially exposed first 8 days following conception, during week 12 until 24, during week 28 until 38.

‡ Includes two live born infants with major congenital anomalies.

1) Neural tube defect, potentially exposed all 30 days before conception, not after conception.

2) Major congenital anomaly not further specified, potentially exposed the first 15 days of the 30 days before conception, not after conception.



**Table 3: Odds ratios for congenital anomalies and fetal death and isotretinoin exposure during pregnancy**

| Congenital anomalies                  | Unexposed fetuses (N=208,106) | Isotretinoin-exposed fetuses |                      |                      |                                           |                      |                      |                                                   |                      |                      |
|---------------------------------------|-------------------------------|------------------------------|----------------------|----------------------|-------------------------------------------|----------------------|----------------------|---------------------------------------------------|----------------------|----------------------|
|                                       |                               | During pregnancy (N=47)      |                      |                      | 30 days before or during pregnancy (N=53) |                      |                      | 30 days before or 1 <sup>st</sup> trimester (N=3) |                      |                      |
|                                       |                               | N                            | OR                   | Adjusted-OR*         | N                                         | OR                   | Adjusted-OR*         | N                                                 | OR                   | Adjusted-OR*         |
| Any congenital anomaly or fetal death | 9,041                         | 3                            | 1.51<br>(0.47-4.84)  | 1.48<br>(0.46-4.77)  | 5                                         | 2.30<br>(0.91-5.77)  | 2.28<br>(0.91-5.72)  | 3                                                 | 3.68<br>(1.43-9.48)  | 3.64<br>(1.41-9.39)  |
| Fetal death                           | 3,404                         | 3                            | 4.10<br>(1.27-13.22) | 4.00<br>(1.25-12.91) | 3                                         | 3.61<br>(1.13-11.58) | 3.57<br>(1.11-11.47) | 3                                                 | 5.64<br>(1.73-18.42) | 5.55<br>(1.70-18.19) |
| Any congenital anomaly                | 6,246                         | ±                            | 0.70<br>(0.10-5.09)  | 0.70<br>(0.10-5.06)  | 3                                         | 1.94<br>(0.61-6.22)  | 1.93<br>(0.60-6.18)  | ±                                                 | 3.03<br>(0.93-9.90)  | 3.02<br>(0.92-9.86)  |

\*maternal age in categories (<20, 20-24, 25-29, 30-34, ≥35)

Formatted: English (U.S.)

### Description of cases

The pregnancies exposed to isotretinoin in the 30 days before or during pregnancy resulted in five cases of fetal death or congenital anomalies. The year of conception of these cases was 2002 (n=2), 2003 (n=2) and 2005 (n=1). Three of the five cases were exposed to isotretinoin during pregnancy and two cases were only exposed to isotretinoin in the 30 days before conception because conception occurred within 30 days after isotretinoin discontinuation and no new isotretinoin prescriptions were filled afterwards. All three pregnancies exposed to isotretinoin during pregnancy started while the mother was already using isotretinoin, and all three cases ended in fetal death. One pregnancy was exposed to isotretinoin 29 days following conception and no new isotretinoin prescriptions were filled after conception. The pregnancy ended in fetal death after 19 weeks. In the second pregnancy two isotretinoin prescriptions were filled during pregnancy resulting in a total of 166 days of isotretinoin exposure during pregnancy (19 days in the first trimester and 79 and 68 days in the second and third trimester of pregnancy, respectively). After 38 weeks, the pregnancy resulted in fetal death and cardiovascular anomalies (not further specified). In the third pregnancy, four isotretinoin prescriptions were filled during pregnancy resulting in a total of 163 days of isotretinoin exposure during pregnancy (73 in first, 51 and 39 in second and third trimester respectively). After 35 weeks the pregnancy ended in fetal death. The two remaining pregnancies were only exposed to isotretinoin in the 30 days before conception. Both fetus were born with gestational age of 39 or 40 weeks and had congenital anomalies; one had a neural tube defect and for the other the anomaly was not further specified.

### DISCUSSION

This study ~~showed~~shows that 2 per 10,000 pregnancies were exposed to isotretinoin ~~during pregnancy~~ despite the ~~fact that a~~ PPP which is implemented to prevent isotretinoin use during pregnancy. ~~In~~Although this study ~~was not intended to estimate~~ the ~~majority~~teratogenic risks of isotretinoin, adverse fetal and neonatal outcomes among these exposed pregnancies, ~~women started isotretinoin when already pregnant. The risk of congenital anomalies or fetal deaths was increased in pregnancies that were exposed to isotretinoin during the 30 days prior or during the first trimester of pregnancy while the risk of fetal death was increased during all analysed time windows.~~

1  
2  
3  
4  
5 observed. That there are still women who are using isotretinoin during pregnancy despite the implementation  
6 of the PPP is of major concern. ~~Since~~ ~~Especially since~~ the majority of ~~the~~ isotretinoin exposed women (60%)  
7 were already pregnant at the time of first isotretinoin prescription, ~~and~~ it seems that pregnancy ~~in isotretinoin~~  
8 ~~users~~ was not always excluded before ~~drug~~ isotretinoin dispensing (box 1). ~~These exposed pregnancies could~~  
9 ~~probably have been prevented when appropriate pregnancy testing would have been performed~~. Furthermore,  
10 ~~it was earlier demonstrated that~~ women of reproductive age treated with isotretinoin ~~might did~~ not always  
11 ~~have used~~ ~~use~~ effective contraceptive measures, ~~because only up to 59% of these women concomitantly used~~  
12 ~~hormonal contraceptives~~.<sup>8,9</sup> Our study showed that compliance with the ~~recommended~~ maximum length of  
13 prescription of 30 days ~~between 1999 and 2007~~ was limited since one third of isotretinoin dispensings  
14 exceeded 30 days. ~~This, which however~~ decreased ~~from 50% in 1999~~ to 13% in 2007. ~~Based on these findings it~~  
15 ~~is clear that compliance with the PPP in the Netherlands between 1999 and 2007 was incomplete, which~~  
16 ~~suggests a higher awareness. Based on this study, no conclusions can be drawn as to which elements of the PPP~~  
17 ~~fail but it is obvious that the PPP is not completely effective. These findings are in line with previous Dutch~~  
18 ~~studies that found that concomitant use of hormonal contraceptives in isotretinoin using women of~~  
19 ~~reproductive age is limited to 52%–59%.~~<sup>10-11</sup> Limited compliance with the PPP ~~in the Netherlands~~ was also  
20 observed in a survey among Dutch pharmacists which indicated that in 2007 and 2011, 44% and 49% of  
21 pharmacists respectively checked the use of contraception at every isotretinoin dispensing.<sup>17,14</sup> The percentage  
22 of pharmacists that asked for negative pregnancy tests was stable with 15% and 16% respectively and is in line  
23 with ~~the results of~~ our study which ~~demonstrate that it seems~~ ~~demonstrated~~ that pregnancy is not always  
24 excluded before initiating isotretinoin ~~and result in isotretinoin exposed pregnancies that could have been~~  
25 ~~prevented~~. Our study showed that compliance with the recommended maximum length of prescription of 30  
26 ~~days was limited since one third of isotretinoin dispensings exceeded 30 days which however decreased from~~  
27 ~~50% in 1999 to 13% in 2007, Based on these results it is clear that compliance with the PPP in the Netherlands~~  
28 ~~between 1999 and 2007 was incomplete~~. These findings suggest an ongoing need to educate healthcare  
29 professionals and patients on the fetal risks of isotretinoin and the PPP, especially since isotretinoin is ~~mostly~~  
30 used in young women of reproductive age. ~~If that does not work, more strict measures might have to be~~  
31 ~~considered~~.  
32 ~~Previous studies on isotretinoin use during pregnancy in other Western countries showed comparable results~~  
33 ~~indicating that the limited compliance to the PPP is not restricted to the Netherlands.~~<sup>6,15-17</sup> In the United States

1  
2  
3  
4  
5  
6  
7  
8  
9  
10  
11  
12  
13  
14  
15  
16  
17  
18  
19  
20  
21  
22  
23  
24  
25  
26  
27  
28  
29  
30  
31  
32  
33  
34  
35  
36  
37  
38  
39  
40  
41  
42  
43  
44  
45  
46  
47  
48  
49  
50  
51  
52  
53  
54  
55  
56  
57  
58  
59  
60

(US), the most recent isotretinoin PPP, called iPLEDGE, has been implemented since 2006 and is stricter than the EU PPP. iPLEDGE is an internet-based system that requires registration of all stakeholders with monthly updates on prescription, pregnancy tests, contraceptive use, and acknowledgement of risks.<sup>18,17</sup> The pregnancy rate among isotretinoin users in the US with the iPLEDGE PPP was estimated at 2.7 per 1,000 treatment courses and did not change compared to the previous PPP called SMART (System to Manage Accutane Related Teratogenicity) while only small improvements in compliance with contraceptive measures were observed.<sup>18</sup>

~~<sup>17,18</sup> Further. Apparently, also iPLEDGE does not bring complete security because further~~ restrictive measures as in iPLEDGE do not seem to improve the results and may ~~contribute to the potential inefficiencies of~~ add unnecessary burden to the healthcare system since healthcare professionals and patients need to register and verify information on a monthly basis.<sup>4</sup>

~~The proportion of congenital anomalies or fetal death after isotretinoin exposure during pregnancy in our study was 6.4%. Comparable proportions were observed in a German study which also found that 76% of isotretinoin exposed pregnancies ended in an elective pregnancy termination.<sup>7</sup> No information on elective pregnancy termination was available in our study but the potentially high proportion of elective pregnancy termination may explain the lower proportions of congenital anomalies after isotretinoin exposure during pregnancy observed in our study (2.1%) as compared to earlier studies that reported 26%–28%.<sup>3,4</sup> The present study identified a total of five pregnancies of which the adverse pregnancy outcome, including three fetal deaths, may be related to isotretinoin use. Although the statistical analysis should be interpreted cautiously due to low numbers, we observed an increased risk of fetal death whereas for congenital anomalies an increased risk could not be determined. The neural tube defect in one of the cases is not a known CNS defect typical for retinoid embryopathy<sup>3</sup> and furthermore, may be related to other factors since isotretinoin exposure was only identified in the 30 days period before conception. Nevertheless, according to the isotretinoin PPP, the pregnancy should not have occurred. Another pregnancy resulted in fetal death and also reported a cardiovascular anomaly (not further specified) after isotretinoin exposure during the first weeks after conception. This anomaly may be a typical symptom of retinoid embryopathy such as ventricular septic defect<sup>3</sup>, but insufficient information on the congenital anomaly was available to draw these conclusions. Congenital anomalies identified in other cases were also coded on high level only (e.g. congenital anomaly not further specified). For the assessment of retinoid embryopathy, both detailed descriptions of the diagnosed congenital~~

1  
2  
3  
4  
5 anomaly as well as detailed information on drug exposure preferably verified by the patient whether the drug  
6 was actually taken are necessary.  
7

#### 8 9 **Strengths and weaknesses of the study**

10  
11 A strength of this study is that we used a population based study design including virtually complete and  
12 detailed drug dispensing data and pregnancy outcome data of a large cohort, which enabled calculating  
13 accurate estimating nationwide isotretinoin exposure rates among pregnant women which can be extrapolated  
14 to the national situation to indicate impact on public health. This would be more difficult and probably less  
15 accurate when using spontaneous reported cases or data from teratology information services, since these  
16 data sources do not provide clear denominators to calculate exposure rates and may suffer from substantial  
17 underreporting. Although our absolute numbers were small, all exposure and outcome information was  
18 prospectively gathered and unbiased because nobody was aware of the research hypothesis. Moreover, we  
19 simply confirmed an adverse reaction which is nowadays undisputed.  
20  
21

22  
23 Our results might even underestimate the actual risk because no information can be provided on spontaneous  
24 and elective abortions that occurred before gestational age of 16 weeks because these data are not captured in  
25 the PRN database and these pregnancies were therefore not included in our cohort.  
26  
27

28  
29 A known limitation of using drug dispensing data is that it does not confirm the actual use of the drug under  
30 study and does not provide information on the precise time window of drug use. In addition, it is likely that  
31 women may change or stop their medication use when they become aware of pregnancy. However, it should  
32 be noted that our data show that the majority (80%) of pregnant women who filled prescriptions for  
33 isotretinoin came back for refills, suggesting that they really used the drug.  
34  
35

36  
37 This study provides no information on spontaneous abortions that occurred until gestational age of 16 weeks  
38 and ETOPs because these data are not captured in the PRN database and these pregnancies were thus not  
39 included in our cohort. This resulted in an underestimation of the number of pregnancies that were potentially  
40 exposed to isotretinoin in the 30 days before or during pregnancy and the adverse fetal and neonatal  
41 outcomes. Studies that estimated the teratogenic risk of isotretinoin using prospectively documented  
42 isotretinoin exposed pregnancies found much higher proportions of pregnancies resulting in spontaneous  
43 abortion, stillbirth or reported congenital malformations i.e. 36% (13 of the 36 fetuses)<sup>3</sup> and 26% (6 of the 23  
44 fetuses)<sup>5</sup>.  
45  
46  
47  
48  
49  
50  
51  
52  
53  
54  
55

1  
2  
3  
4  
5  
6  
7  
8  
9  
10  
11  
12  
13  
14  
15  
16  
17  
18  
19  
20  
21  
22  
23  
24  
25  
26  
27  
28  
29  
30  
31  
32  
33  
34  
35  
36  
37  
38  
39  
40  
41  
42  
43  
44  
45  
46  
47  
48  
49  
50  
51  
52  
53  
54  
55  
56  
57  
58  
59  
60

Without detailed information on drug exposure preferably verified by the patient whether the drug was actually taken and detailed descriptions of the diagnosed fetal outcome as well as on spontaneous abortions, the teratogenic risk of isotretinoin could not be accurately estimated. However, the primary aim of this study was to show that adverse fetal and neonatal outcomes still occur in isotretinoin exposed pregnancies, despite the implemented PPP. Unfortunately, due to the low number of cases it was not possible to adjust in the statistical analysis for important confounding factors other than maternal age such as smoking, alcohol intake, previous pregnancy outcomes and exposure to other potentially teratogenic drugs. Detection bias may also have influenced the incidence and estimated risks of congenital anomalies since more detailed diagnostics might have been used in pregnancies exposed to isotretinoin compared to the unexposed pregnancies. Nevertheless, the results of our study are in line with the undisputed embryotoxicity of isotretinoin and indicate that such events still occur despite the implemented PPP.

#### Implications and future research

In the Netherlands, approximately 180,000 pregnancies are reported annually.<sup>2019</sup> When extrapolating the 2.242 (95% CI 1.636 – 2.939) per 10,000 women potentially exposed to isotretinoin during pregnancy to a national level, there would be 29 to 52 isotretinoin-exposed pregnancies ~~receiving isotretinoin~~ per year yielding unnecessary high risks for congenital anomalies and fetal deaths. Therefore, it is in the interest of public health to implement effective PPPs and improve these measures or their compliance as much as possible to reduce isotretinoin use during pregnancy to the lowest possible level.

With the present study ~~reasons for PPP failure cannot be identified and~~ only the period 1999 to 2007 has been evaluated. ~~More recent data are necessary to further study the up to date situation of the isotretinoin PPP in the Netherlands in order to take appropriate action, especially since the last few years attention for the isotretinoin PPP might have improved the carefulness with which isotretinoin is prescribed and dispensed.~~

The past years in the Netherlands, the PPP is communicated to healthcare professionals via product information,<sup>2420</sup> national general practitioner (GP) standards on treatment of acne,<sup>2421</sup> drug prescription and dispensing systems,<sup>2422</sup> the website of the Dutch Medicines Evaluation Board,<sup>2423</sup> and the common (national) literature on drug information.<sup>2424</sup> Furthermore, research on isotretinoin use in the Netherlands and the PPP is conducted and published in (inter)national scientific medical journals.<sup>9-11-17-26-297-9 14 25-28</sup> Consequently, data

1  
2  
3  
4  
5 after 2007 are needed to judge if attention for the isotretinoin PPP during recent years has improved the  
6 carefulness with which isotretinoin is prescribed and dispensed.  
7  
8

#### 9 **Conclusions**

10  
11 ~~The safe use of isotretinoin is important for public health to prevent unnecessary high risks of congenital~~  
12 ~~anomalies and fetal deaths.~~ Although a PPP was implemented almost 15 years ago, we showed that there are  
13 still pregnancies exposed to isotretinoin in the Netherlands and moreover, we showed that in these exposed  
14 pregnancies there is an elevated risk of congenital anomalies and fetal death. These findings suggest an  
15 ongoing need to educate healthcare professionals and patients on the fetal risks of isotretinoin and the PPP.  
16 Before regulatory measures should be considered, the isotretinoin PPP requires further evaluation using more  
17 recent data to assess whether isotretinoin use among women with reproductive age has improved.  
18  
19

20 which could have been prevented if appropriate exclusion of pregnancy before isotretinoin initiation would  
21 have been performed. Moreover, adverse fetal outcomes were reported among these pregnancies. These  
22 findings from the Netherlands add to the evidence that there is no full compliance to the isotretinoin PPP in  
23 many Western countries. Given the limited success of iPLEDGE, the question is which further measures are able  
24 to improve compliance.  
25  
26  
27  
28  
29  
30  
31  
32

**FIGURE LEGENDS**

**Figure 1:** Percentage of isotretinoin dispensings exceeding the maximum duration of 30 days ~~per~~by calendar year

**Figure 2:** Isotretinoin exposed pregnancies per 10,000 pregnancies ~~per~~by calendar year

— Exposed to isotretinoin in 30 days before or during pregnancy

**Formatted:** Font: 10 pt, Bold

- - - Exposed to isotretinoin during pregnancy

**Formatted:** Font: 10 pt, Bold

**Acknowledgements** The authors would like to thank the Netherlands Perinatal Registry for providing access to their database and contribution to the manuscript.

**Competing interests** All authors have completed the Unified Competing Interest form at [www.icmje.org/coi\\_disclosure.pdf](http://www.icmje.org/coi_disclosure.pdf) and declare that LH and RH are employees of the PHARMO Institute. This independent research institute performs financially supported studies for government and related healthcare authorities and several pharmaceutical companies. MS is leading a research group that sometimes conducts research for pharmaceutical companies. None related to the submitted work; no other relationships or activities that could appear to have influenced the submitted work.

**Details of contributors** Each author participated actively and sufficiently in this study. IZ, RR, LH, MS and BS contributed to the study design and the interpretation of the data. IZ and LH collected and analysed the data. IZ, RR, LH, RH, MS, SS and BS participated in the development and critical review of the manuscript for important intellectual content and provided final approval of the version to be published. A statement that all authors, external and internal, had full access to all of the data (including statistical reports and tables) in the study and can take responsibility for the integrity of the data and the accuracy of the data analysis.

**Ethics approval** Not applicable. The research team did not have access to medical records.

**Funding** This study was supported by the Drug Safety Unit of the Dutch Inspectorate of Health Care.

**Data sharing** No additional data available.



1  
2  
3  
4  
5 **Transparency** The lead author (IZ) affirms that the manuscript is an honest, accurate, and transparent account  
6 of the study being reported; that no important aspects of the study have been omitted; and that any  
7 discrepancies from the study as planned (and, if relevant, registered) have been explained.  
8  
9

10 **Copyright** The Corresponding Author has the right to grant on behalf of all authors and does grant on behalf of  
11 all authors, a worldwide licence to the Publishers and its licensees in perpetuity, in all forms, formats and  
12 media (whether known now or created in the future), to i) publish, reproduce, distribute, display and store the  
13 Contribution, ii) translate the Contribution into other languages, create adaptations, reprints, include within  
14 collections and create summaries, extracts and/or, abstracts of the Contribution, iii) create any other derivative  
15 work(s) based on the Contribution, iv) to exploit all subsidiary rights in the Contribution, v) the inclusion of  
16 electronic links from the Contribution to third party material where-ever it may be located; and, vi) licence any  
17 third party to do any or all of the above.  
18  
19  
20  
21  
22  
23  
24  
25  
26  
27  
28  
29  
30  
31  
32  
33  
34  
35  
36  
37  
38  
39  
40  
41  
42  
43  
44  
45  
46  
47  
48  
49  
50  
51  
52  
53  
54  
55  
56  
57  
58  
59  
60

## References

1. European Medicines Agency (EMA). Annex I of the Summary information on a referral opinion following an arbitration pursuant to article 29 of directive 2001/83/EC for isotretinoin. 2003; Accessed 2 May 2013: [http://www.ema.europa.eu/docs/en\\_GB/document\\_library/Referrals\\_document/Isotretinoin\\_29/WC500010881.pdf](http://www.ema.europa.eu/docs/en_GB/document_library/Referrals_document/Isotretinoin_29/WC500010881.pdf)
2. Rosa FW. Teratogenicity of isotretinoin. *Lancet* 1983;2(8348):513.
3. Lammer EJ, Chen DT, Hoar RM, Agnish ND, Benke PJ, Braun JT, et al. Retinoic acid embryopathy. *N Engl J Med* 1985;313(14):837-41.
4. ~~Dai WS, LaBraico JM, Stern RS. Epidemiology of isotretinoin exposure during pregnancy. *J Am Acad Dermatol* 1992;26(4):599-606.~~
5. ~~Adams J, Lammer EJ. Neurobehavioral teratology of isotretinoin. *Reprod Toxicol* 1993;7(2):175-7.~~
6. ~~Abroms L, Maibach E, Lyon-Daniel K, Feldman SR. What is the best approach to reducing birth defects associated with isotretinoin? *PLoS Med* 2006;3(11):e483.~~
7. ~~Schaefer C, Meister R, Weber-Schoendorfer C. Isotretinoin exposure and pregnancy outcome: an observational study of the Berlin Institute for Clinical Teratology and Drug Risk Assessment in Pregnancy. *Arch Gynecol Obstet* 2010;281(2):221-7.~~
8. ~~Autret-Leca E, Kreft-Jais C, Elefant E, Cissoko H, Darrouzain F, Grimaldi-Bensouda L, et al. Isotretinoin exposure during pregnancy: assessment of spontaneous reports in France. *Drug Saf* 2010;33(8):659-65.~~
9. ~~Crijns I, Straus S, Luteijn M, Gispén-de Wied C, Raine J, de Jong-van den Berg L. Implementation of the harmonized EU isotretinoin Pregnancy Prevention Programme: a questionnaire survey among European regulatory agencies. *Drug Saf* 2012;35(1):27-32.~~
10. ~~Teichert M, Visser LE, Dufour M, Rodenburg E, Straus SM, De Smet PA, et al. Isotretinoin use and compliance with the Dutch Pregnancy Prevention Programme: a retrospective cohort study in females of reproductive age using pharmacy dispensing data. *Drug Saf* 2010;33(4):315-26.~~
11. ~~Crijns HJ, van Rein N, Gispén-de Wied CC, Straus SM, de Jong-van den Berg LT. Prescriptive contraceptive use among isotretinoin users in the Netherlands in comparison with non-users: a drug utilisation study. *Pharmacoepidemiol Drug Saf* 2012;21(10):1060-6.~~
12. ~~Herings RM, Bakker A, Stricker BH, Nap G. Pharmaco-morbidity linkage: a feasibility study comparing morbidity in two pharmacy based exposure cohorts. *J Epidemiol Community Health* 1992;46(2):136-40.~~
13. ~~WHO Collaborating Centre for Drug Statistics Methodology. Anatomical Therapeutic Chemical (ATC) index with Defined Daily Doses (DDDs). Accessed 4 October 2013: [http://www.whocc.no/atc\\_ddd\\_index/](http://www.whocc.no/atc_ddd_index/)~~
14. ~~Stichting Perinatale Registratie Nederland. *Grote Lijnen 10 jaar Perinatale Registratie Nederland*. Utrecht: Stichting Perinatale Registratie Nederland, 2011.~~
15. ~~Houweling LM, Bezemer ID, Penning-van Beest FJ, Meijer WM, van Lingen RA, Herings RM. First year of life medication use and hospital admission rates: premature compared with term infants. *J Pediatr* 2013;163(1):61-6 e1.~~
16. ~~Barfield WD. Standard terminology for fetal, infant, and perinatal deaths. *Pediatrics* 2011;128(1):177-81.~~
17. ~~Crijns I, Mantel-Teeuwisse A, Bloemberg R, Pinas E, Straus S, de Jong-van den Berg L. Healthcare professional surveys to investigate the implementation of the isotretinoin Pregnancy Prevention Programme: a descriptive study. *Expert Opin Drug Saf* 2013;12(1):29-38.~~
18. ~~Berard A, Azoulay L, Koren G, Blais L, Perreault S, Oraichi D. Isotretinoin, pregnancies, abortions and birth defects: a population-based perspective. *Br J Clin Pharmacol* 2007;63(2):196-205.~~
19. ~~Bensouda-Grimaldi L, Jonville-Bera AP, Mouret E, Elefant E, Dhellot H, Delmas C, et al. Isotretinoin: compliance with recommendations in childbearing women. *Ann Dermatol Venerol* 2005;132(5):415-23.~~
20. ~~Pinheiro SP, Kang EM, Kim CY, Governale LA, Zhou EH, Hammad TA. Concomitant use of isotretinoin and contraceptives before and after iPledge in the United States. *Pharmacoepidemiol Drug Saf* 2013;22(12):1251-7.~~
21. ~~Shin J, Cheetham TC, Wong L, Niu F, Kass E, Yoshinaga MA, et al. The impact of the iPLEDGE program on isotretinoin fetal exposure in an integrated health care system. *J Am Acad Dermatol* 2011;65(6):1117-25.~~
22. ~~Stichting Perinatale Registratie Nederland. *Grote Lijnen 1999 - 2012*. Utrecht: Stichting Perinatale Registratie Nederland, 2013.~~
23. ~~Roaccutane Summary of Product Characteristics. Accessed 3 January 2014: <http://db.cbg-meb.nl/IB-teksten/h10305.pdf>~~
24. ~~Smeets JG GS, Bruinsma, et al. NHG-standard acne. *Huisarts wet* 2007;50:259-68.~~

- 1  
2  
3  
4  
5 | ~~23~~22. Implementatie Bijzonder Kenmerk: 'Let op zwangerschapspreventieprogramma' in Z-index. 2009;  
6 Accessed 3 March 2014:<https://www.z-index.nl/g-standaard/beschrijvingen/functioneel/wijzigingen/mb/bijzondere-kenmerken/IR%20BK%20Zwangerschapspreventieprogramma%20V-1-1-1.pdf>  
7  
8 | ~~24~~23. College ter Beoordeling van Geneesmiddelen / Medicines Evaluation Board (CBG/MEB).  
9 Zwangerschapspreventie programmas (ZPP). Accessed 3 March 2014:<http://www.cbg-meb.nl/CBG/nl/humane-geneesmiddelen/geneesmiddelenbew/zwangerschapspreventieprogramma/default.htm>  
10  
11 | ~~25~~24. Commissie Farmaceutische Hulp. Isotretinoïne: waarschuwingen en voorzorgen. . *Farmacotherapeutisch kompas*. College van Zorgverzekeringen 2007.  
12  
13 | ~~26~~25. Crijns HJ, Straus SM, Gispén-de Wied C, de Jong-van den Berg LT. Compliance with pregnancy prevention programmes of isotretinoin in Europe: a systematic review. *Br J Dermatol* 2011;164(2):238-44.  
14  
15 | ~~27~~26. Fledderus S. Zwangerschapspreventie bij teratogene middelen faalt. *Medisch Contact*, 2012;48.  
16  
17 | ~~28~~27. Manders KC, de Vries LC, Roumen FJ. Pregnancy after isotretinoin use. *Ned Tijdschr Geneeskd* 2013;157(41):A6567.  
18  
19 | ~~29~~28. Crijns HJ. Teratogene middelen: zwangerschapspreventie kan beter. *Pharmaceutisch Weekblad (PW)*, 2012;October.  
20  
21  
22  
23  
24  
25  
26  
27  
28  
29  
30  
31  
32  
33  
34  
35  
36  
37  
38  
39  
40  
41  
42  
43  
44  
45  
46  
47  
48  
49  
50  
51  
52  
53  
54  
55  
56 |  
57  
58  
59  
60

1  
2  
3  
4  
5  
6  
7  
8  
9  
10  
11  
12  
13  
14  
15  
16  
17  
18  
19  
20  
21  
22  
23  
24  
25  
26  
27  
28  
29  
30  
31  
32  
33  
34  
35  
36  
37  
38  
39  
40  
41  
42  
43  
44  
45  
46  
47  
48  
49  
50  
51  
52  
53  
54  
55  
56  
57  
58  
59  
60

**Figure 1:** Percentage of isotretinoin dispensings exceeding the maximum duration of 30 days by calendar year



133x101mm (300 x 300 DPI)

Review only

Figure 2: Isotretinoin exposed pregnancies per 10,000 pregnancies by calendar year



133x109mm (300 x 300 DPI)

## STROBE Statement—checklist of items that should be included in reports of observational studies

|                              | Item No | Recommendation                                                                                                                                                                             | Page |
|------------------------------|---------|--------------------------------------------------------------------------------------------------------------------------------------------------------------------------------------------|------|
| <b>Title and abstract</b>    | 1       | (a) Indicate the study's design with a commonly used term in the title or the abstract                                                                                                     | 1    |
|                              |         | (b) Provide in the abstract an informative and balanced summary of what was done and what was found                                                                                        | 3    |
| <b>Introduction</b>          |         |                                                                                                                                                                                            |      |
| Background/rationale         | 2       | Explain the scientific background and rationale for the investigation being reported                                                                                                       | 4    |
| Objectives                   | 3       | State specific objectives, including any prespecified hypotheses                                                                                                                           | 5    |
| <b>Methods</b>               |         |                                                                                                                                                                                            |      |
| Study design                 | 4       | Present key elements of study design early in the paper                                                                                                                                    | 5    |
| Setting                      | 5       | Describe the setting, locations, and relevant dates, including periods of recruitment, exposure, follow-up, and data collection                                                            | 5    |
| Participants                 | 6       | <i>Case-control study</i> —Give the eligibility criteria, and the sources and methods of case ascertainment and control selection. Give the rationale for the choice of cases and controls | 5-6  |
|                              |         | <i>Case-control study</i> —For matched studies, give matching criteria and the number of controls per case                                                                                 | NA   |
| Variables                    | 7       | Clearly define all outcomes, exposures, predictors, potential confounders, and effect modifiers. Give diagnostic criteria, if applicable                                                   | 5-78 |
| Data sources/<br>measurement | 8*      | For each variable of interest, give sources of data and details of methods of assessment (measurement). Describe comparability of assessment methods if there is more than one group       | 6-7  |
| Bias                         | 9       | Describe any efforts to address potential sources of bias                                                                                                                                  | 7    |
| Study size                   | 10      | Explain how the study size was arrived at                                                                                                                                                  | 6-7  |
| Quantitative variables       | 11      | Explain how quantitative variables were handled in the analyses. If applicable, describe which groupings were chosen and why                                                               | 6-8  |
| Statistical methods          | 12      | (a) Describe all statistical methods, including those used to control for confounding                                                                                                      | 7    |
|                              |         | (b) Describe any methods used to examine subgroups and interactions                                                                                                                        | 7    |
|                              |         | (c) Explain how missing data were addressed                                                                                                                                                | NA   |
|                              |         | (d) <i>Case-control study</i> —If applicable, explain how matching of cases and controls was addressed                                                                                     | NA   |
|                              |         | (e) Describe any sensitivity analyses                                                                                                                                                      | 6    |

Continued on next page

| <b>Results</b>           |     |                                                                                                                                                                                                              | <b>Page</b>   |
|--------------------------|-----|--------------------------------------------------------------------------------------------------------------------------------------------------------------------------------------------------------------|---------------|
| Participants             | 13* | (a) Report numbers of individuals at each stage of study—eg numbers potentially eligible, examined for eligibility, confirmed eligible, included in the study, completing follow-up, and analysed            | 7             |
|                          |     | (b) Give reasons for non-participation at each stage                                                                                                                                                         | NA            |
|                          |     | (c) Consider use of a flow diagram                                                                                                                                                                           | NA            |
| Descriptive data         | 14* | (a) Give characteristics of study participants (eg demographic, clinical, social) and information on exposures and potential confounders                                                                     | 8; (Table 1)  |
|                          |     | (b) Indicate number of participants with missing data for each variable of interest                                                                                                                          | NA            |
| Outcome data             | 15* | <i>Case-control study</i> —Report numbers in each exposure category, or summary measures of exposure                                                                                                         | 9 (Table 2)   |
| Main results             | 16  | (a) Give unadjusted estimates and, if applicable, confounder-adjusted estimates and their precision (eg, 95% confidence interval). Make clear which confounders were adjusted for and why they were included | 11; (Table 3) |
|                          |     | (b) Report category boundaries when continuous variables were categorized                                                                                                                                    | NA            |
|                          |     | (c) If relevant, consider translating estimates of relative risk into absolute risk for a meaningful time period                                                                                             | NA            |
| Other analyses           | 17  | Report other analyses done—eg analyses of subgroups and interactions, and sensitivity analyses                                                                                                               | 11;(Table 3)  |
| <b>Discussion</b>        |     |                                                                                                                                                                                                              |               |
| Key results              | 18  | Summarise key results with reference to study objectives                                                                                                                                                     | 12-13         |
| Limitations              | 19  | Discuss limitations of the study, taking into account sources of potential bias or imprecision. Discuss both direction and magnitude of any potential bias                                                   | 14            |
| Interpretation           | 20  | Give a cautious overall interpretation of results considering objectives, limitations, multiplicity of analyses, results from similar studies, and other relevant evidence                                   | 13-14         |
| Generalisability         | 21  | Discuss the generalisability (external validity) of the study results                                                                                                                                        | 15            |
| <b>Other information</b> |     |                                                                                                                                                                                                              |               |
| Funding                  | 22  | Give the source of funding and the role of the funders for the present study and, if applicable, for the original study on which the present article is based                                                | 16            |

\*Give information separately for cases and controls in case-control studies and, if applicable, for exposed and unexposed groups in cohort and cross-sectional studies.

**Note:** An Explanation and Elaboration article discusses each checklist item and gives methodological background and published examples of transparent reporting. The STROBE checklist is best used in conjunction with this article (freely available on the Web sites of PLoS Medicine at <http://www.plosmedicine.org/>, Annals of Internal Medicine at <http://www.annals.org/>, and Epidemiology at <http://www.epidem.com/>). Information on the STROBE Initiative is available at [www.strobe-statement.org](http://www.strobe-statement.org).

# BMJ Open

## Isotretinoin exposure during pregnancy: a population-based study in the Netherlands

|                                 |                                                                                                                                                                                                                                                                                                                                                                                                                                                                                                                                                                                               |
|---------------------------------|-----------------------------------------------------------------------------------------------------------------------------------------------------------------------------------------------------------------------------------------------------------------------------------------------------------------------------------------------------------------------------------------------------------------------------------------------------------------------------------------------------------------------------------------------------------------------------------------------|
| Journal:                        | <i>BMJ Open</i>                                                                                                                                                                                                                                                                                                                                                                                                                                                                                                                                                                               |
| Manuscript ID:                  | bmjopen-2014-005602.R2                                                                                                                                                                                                                                                                                                                                                                                                                                                                                                                                                                        |
| Article Type:                   | Research                                                                                                                                                                                                                                                                                                                                                                                                                                                                                                                                                                                      |
| Date Submitted by the Author:   | 10-Sep-2014                                                                                                                                                                                                                                                                                                                                                                                                                                                                                                                                                                                   |
| Complete List of Authors:       | Zomerdijk, Ingeborg; Erasmus University Medical Center, Medical Informatics<br>Ruiter, Rikje; Groene Hart Hospital, Internal Medicine; Erasmus University Medical Center, Epidemiology<br>Houweling, Leanne; PHARMO Institute for Drug Outcomes Research, Herings, Ron; PHARMO Institute for Drug Outcomes Research, Sturkenboom, Miriam; Erasmus University Medical Center, Medical Informatics<br>Straus, Sabine; Erasmus University Medical Center, Medical Informatics<br>Stricker, Bruno; Erasmus University Medical Center, Epidemiology; Inspectorate of Health Care, Drug Safety Unit |
| <b>Primary Subject Heading</b>: | Epidemiology                                                                                                                                                                                                                                                                                                                                                                                                                                                                                                                                                                                  |
| Secondary Subject Heading:      | Pharmacology and therapeutics, Dermatology                                                                                                                                                                                                                                                                                                                                                                                                                                                                                                                                                    |
| Keywords:                       | Acne < DERMATOLOGY, EPIDEMIOLOGY, Adverse events < THERAPEUTICS, isotretinoin, pregnancy prevention programme                                                                                                                                                                                                                                                                                                                                                                                                                                                                                 |
|                                 |                                                                                                                                                                                                                                                                                                                                                                                                                                                                                                                                                                                               |

SCHOLARONE™  
Manuscripts

only



**Isotretinoin exposure during pregnancy: a population-based study in the Netherlands**

Inge M Zomerdijk, Rikje Ruiten, Leanne MA Houweling, Ron MC Herings, Miriam CJM Sturkenboom, Sabine MJM Straus, Bruno H Stricker

Department of Medical Informatics, Erasmus University Medical Center, Dr. Molewaterplein 50, 3015 GE, Rotterdam, The Netherlands Inge M Zomerdijk

PhD candidate

Internal medicine, GHZ, Bleulandweg 10, 2803 HH, Gouda, the Netherlands Rikje Ruiten  
medical doctor

PHARMO Institute for Drug Outcomes Research, Van Deventerlaan 30-40, 3528 AE Utrecht, The Netherlands

Leanne MA Houweling

business development manager

PHARMO Institute for Drug Outcomes Research, Van Deventerlaan 30-40, 3528 AE Utrecht, The Netherlands

Ron MC Herings

director

Department of Medical Informatics, Erasmus University Medical Center, Dr. Molewaterplein 50, 3015 GE, Rotterdam, The Netherlands Miriam CJM Sturkenboom

professor

Department of Medical Informatics, Erasmus University Medical Center, Dr. Molewaterplein 50, 3015 GE, Rotterdam, The Netherlands Sabine MJM Straus

associate professor

Department of Epidemiology, Erasmus University Medical Center, Dr. Molewaterplein 50, 3015 GE, Rotterdam, The Netherlands Bruno H Stricker

professor

Correspondence to: Bruno H Stricker [b.stricker@erasmusmc.nl](mailto:b.stricker@erasmusmc.nl)

Department of Epidemiology, Erasmus University Medical Centre, P.O. Box 2040, 3000 CA Rotterdam, The Netherlands.

key words: isotretinoin, pregnancy prevention programme, teratogens, congenital malformations

Word count: 3580 words

**ABSTRACT**

**Objective** To estimate isotretinoin exposure in Dutch pregnant women despite the implemented pregnancy prevention programme (PPP) and secondly, to analyse the occurrence of adverse fetal or neonatal outcomes in these isotretinoin exposed pregnancies.

**Design** Population based study

**Setting** the Netherlands

**Participants** a cohort of 203,962 pregnancies with onset between 1 January 1999 and 1 September 2007 consisting of 208,161 fetuses or neonates.

**Main outcome measures** Isotretinoin exposure in the 30 days before or during pregnancy. Proportions of adverse fetal or neonatal outcomes, defined as intrauterine deaths  $\geq$  16 week of gestation and neonates with major congenital anomalies. Odds ratios (ORs) with 95% confidence intervals (CI) adjusted for maternal age were calculated to estimate the risk of adverse fetal or neonatal outcome after maternal isotretinoin exposure.

**Results** 51 pregnancies, 2.5 (95%CI 1.9 to 3.3) per 10,000 pregnancies, were exposed to isotretinoin despite the pregnancy prevention programme. 45 of these pregnancies, 2.2 (95%CI 1.6 to 2.9) per 10,000 pregnancies, were exposed to isotretinoin during pregnancy and six additional women became pregnant within 30 days after isotretinoin discontinuation. In sixty percent of isotretinoin exposed pregnancies, women started isotretinoin while already pregnant. In five out of the 51 isotretinoin exposed pregnancies, 9.4% (95%CI 1.3 to 17.6), had an adverse fetal or neonatal outcome. The OR for adverse fetal or neonatal outcomes after isotretinoin exposure in 30 days before or during pregnancy was 2.3 (95%CI 0.9 to 5.7) after adjustment for maternal age.

**Conclusions** Although a PPP was already implemented in 1988, we showed that isotretinoin exposed pregnancies and adverse fetal and neonatal events potentially related to the exposure still occur. These findings from the Netherlands add to the evidence that there is no full compliance to the isotretinoin PPP in many Western countries. Given the limited success of iPLEDGE, the question is which further measures are able to improve compliance.

## ARTICLE SUMMARY

**Strengths and limitations of this study**

- This is the first population-based study in the EU on isotretinoin exposure during pregnancy in a large cohort of more than 200,000 pregnancies which enabled estimating isotretinoin exposure rates among pregnant women and its consequences on a nationwide scale.
- From the virtually complete and detailed drug dispensing data, isotretinoin exposure could only be estimated since drug dispensing data does not ascertain actual drug use and precise exposure intervals. However, patients coming for refills are usually taking their drug.
- Spontaneous abortions before gestational age of 16 weeks and elective abortions were not included in our cohort and therefore our results probably underestimate the number of isotretinoin exposed pregnancies and its consequences.
- Specific teratogenic risks could not be estimated with data lacking information on pregnancies until 16 weeks of gestation and lacking detailed descriptions of adverse fetal and neonatal outcomes.

## INTRODUCTION

Isotretinoin, a vitamin A derivative, is licensed in the European Union (EU) since 1983 and is indicated for systemic treatment of severe acne (such as nodular or conglobate acne or acne at risk of permanent scarring) in patients resistant to adequate courses of standard therapy with systemic antibacterials and topical therapy.<sup>1</sup>

The teratogenic potential is an important characteristic of isotretinoin. Animal studies already suggested teratogenic effects in humans and isotretinoin has been contraindicated for use during pregnancy since the very beginning of the marketing authorisation. Despite this contraindication, the first cases of congenital anomalies after isotretinoin use during pregnancy were documented already in 1983.<sup>2</sup> As described by Lammer et al. in 1985, isotretinoin embryopathy consists of craniofacial, cardiac, thymic and central nervous system (CNS) defects.<sup>3</sup> They found a relative risk of 26 for this group of major congenital malformations after systemic isotretinoin exposure during some parts of the first 10 weeks after conception.<sup>3</sup> Elective termination of pregnancy (ETOP) was decided in more than 50% of exposed pregnancies and 20% of the remaining pregnancies ended in a first trimester spontaneous abortion.<sup>3</sup> Reports of congenital anomalies after isotretinoin use accumulated and consequently, in 1988 the marketing authorisation holder of isotretinoin implemented a world-wide Pregnancy Prevention Programme (PPP) to better prevent pregnancies among systemic isotretinoin users.<sup>4</sup> The PPP included an educational programme for prescribers and patients including material to be used in counselling women about the need to prevent pregnancy while taking isotretinoin. Conditions for prescribing included a negative pregnancy test, the use of reliable contraception and a signed patient consent form.<sup>4</sup> In 2003, a review of isotretinoin by the European Medicine Agency (EMA) resulted in a compulsory European harmonised PPP for all isotretinoin containing products.<sup>1</sup> The elements of the European wide PPP are listed in box 1.

### **Box 1:** Elements of the EU isotretinoin PPP

---

1. Isotretinoin is contraindicated in pregnant women and should only be initiated in women of reproductive age who understand the teratogenic risk and the need for regular follow-up
  2. Use of effective contraceptive measures from four weeks before isotretinoin initiation until four weeks after treatment discontinuation. At least one and preferably two complementary forms of contraception including a barrier method should be used.
  3. Pregnancy testing should be done before, during and five weeks after discontinuation of isotretinoin
  4. Isotretinoin should only be prescribed by or under the supervision of a physician with experience in the use of systemic retinoids
  5. Prescription should be limited to 30 days of treatment and continuation of treatment requires a new prescription.
  6. Dispensing of isotretinoin should occur within a maximum of seven days after prescription.
  7. Educational programmes for healthcare professionals including prescribers and pharmacists, and patients are in place to inform them about the teratogenic risk and to create awareness of the PPP.
-

1 The safe use of isotretinoin in women of reproductive age is in the interest of public health because of the  
2 potential risk of spontaneous and elective abortions, and, more importantly, children with major congenital  
3 anomalies require continuous healthcare throughout their life. Although a PPP has been implemented in the  
4 EU, pregnancies during isotretinoin therapy still occur.<sup>5 6</sup> The regulatory authorities of sixteen EU member  
5 states responded in 2009 to a survey that isotretinoin exposed pregnancies have occurred in their country.<sup>7</sup> A  
6 French study between 2003 and 2006 estimated a pregnancy rate from 0.4 to 1.2 per 1000 female isotretinoin  
7 users within reproductive age.<sup>6</sup> Studies in the Netherlands observed that only 52% to 59% of the female  
8 isotretinoin users of reproductive age used concomitant hormonal contraceptives, which was higher than the  
9 39%-46% observed in the general female population of similar age, but lower than anticipated.<sup>8 9</sup> Although  
10 these studies show limited compliance with the isotretinoin PPP, it is not known whether isotretinoin exposure  
11 also occurs during pregnancy and what the outcome of these pregnancies is. Therefore, the objective of our  
12 study was to estimate isotretinoin exposure in Dutch pregnant women despite the implemented PPP and  
13 secondly, to analyse the occurrence of adverse fetal and neonatal outcomes in these isotretinoin exposed  
14 pregnancies.

## 28 **METHODS**

### 29 **Data sources**

30 For this population based study a cohort of 203,962 pregnancies consisting of 208,161 fetuses was constructed  
31 using a linkage between the PHARMO Database Network and the Netherlands Perinatal Registry (PRN). The  
32 PHARMO Database Network is a dynamic population-based cohort including, amongst other information, drug-  
33 dispensing records from community pharmacies for more than 3 million individuals in the Netherlands  
34 (approximately 20% of the Dutch population) that are collected since 1986.<sup>10</sup> The drug dispensing data contain  
35 the following information per prescription: the Anatomical Therapeutic Chemical (ATC) classification of the  
36 drug, dispensing date, regimen, quantity dispensed and estimated length of duration of use.<sup>11</sup> The PRN is a  
37 nationwide registry that contains linked and validated data from four databases: the national obstetric  
38 database for midwives (LVR-1), the national obstetric database for gynaecologists (LVR-2), the national  
39 obstetric database for general practitioners (LVR-h) and the national neonatal/paediatric database (LNR).<sup>12</sup> The  
40 registry contains information about care before, during, and after delivery as well as maternal and neonatal  
41 characteristics and outcome of 95% of 180,000 pregnancies annually in the Netherlands with a gestational age  
42 of at least 16 weeks. The PRN includes information on pregnancy outcome including congenital anomalies

1 detected during pregnancy, at birth or within the first year after birth. The probabilistic linking method  
2  
3 between PHARMO and PRN has been described in detail elsewhere but was generally based on the birth date  
4  
5 of the mother and child and their postal zip codes.<sup>13</sup> To be included in the cohort the mother should be  
6  
7 registered in the community pharmacy database of PHARMO during the whole pregnancy. The date of  
8  
9 conception was estimated based on the last menstrual period or ultrasound, as recorded in the PRN, and was  
10  
11 truncated to full weeks.

### 12 13 **Isotretinoin dispensings**

14  
15 All dispensings for systemic (oral) isotretinoin (ATC D10BA01) filled in community pharmacies by women  
16  
17 included in our cohort within the 12-months period before or during pregnancy were extracted from the  
18  
19 PHARMO Database Network. Considering a daily dosage of 0.5 mg-1mg per kilogram daily,<sup>1</sup> isotretinoin  
20  
21 prescriptions dispensed on the same day were assumed to be used simultaneously and therefore these  
22  
23 dispensings were pooled and considered as one dispensing (e.g. the prescriptions of a 10 mg and 20 mg tablets  
24  
25 dispensed at the same time to reach a daily dosage of 30mg). For each isotretinoin dispensing, the length of  
26  
27 the dispensing was calculated by dividing the total number of prescribed units by the number of units (doses)  
28  
29 to be taken per day. In case isotretinoin dispensings that were pooled together had different lengths, the  
30  
31 length of the single dispensing with the longest duration was used. To assess compliance with the PPP, we  
32  
33 calculated the proportion of dispensings that exceeded 30 days, which is the maximum length according to the  
34  
35 EU PPP.  
36  
37

### 38 39 **Drug exposure interval**

40  
41 For all pregnancies (N=203,962) with of gestational age of at least 16 weeks included in the cohort, isotretinoin  
42  
43 exposure was estimated based on isotretinoin dispensing data (ATC D10BA01) filled by the mother during the  
44  
45 12-months period before and during pregnancy. Exposure in person time (days) was calculated by dividing the  
46  
47 total number of prescribed units by the number of prescribed units per day. Isotretinoin exposure periods were  
48  
49 defined considering a possible overlap of isotretinoin dispensings. Gaps, isotretinoin free periods between two  
50  
51 isotretinoin dispensings, were not permitted meaning that an isotretinoin exposure period ends once an  
52  
53 isotretinoin free period was identified. Using the start and end date of the isotretinoin exposure period, the  
54  
55 number of days exposed was estimated for the following exposure intervals: 30 days before conception, first  
56  
57 90 days of gestation (first trimester), day 90-179 of gestation (second trimester) and day 180 – delivery (third  
58  
59  
60

1 trimester). In addition, the entire period 30 days before pregnancy until delivery as well as the period from 30  
2 days before till the end of the first trimester were analysed separately.

### 6 **Adverse fetal or neonatal outcomes**

7  
8 For each fetus (N=208,161), we determined whether adverse fetal or neonatal outcomes were reported.  
9  
10 Adverse fetal or neonatal outcomes were defined as all intrauterine deaths  $\geq$  16 week of gestation and live  
11 born infants with major congenital anomalies. If possible, congenital anomalies were categorised into nine sub-  
12 groups: abdominal wall and skin disorders; cardiovascular defects; defects in the digestive system; defects in  
13 the nervous system; musculoskeletal defects; respiratory defects; urogenital defects; multiple, syndrome or  
14 chromosomal anomalies; or other congenital malformations. As we were interested in adverse fetal outcomes  
15 potentially induced by maternal drug exposure, chromosomal anomalies were not considered as an adverse  
16 outcome in the analyses.  
17  
18  
19  
20  
21  
22  
23

### 25 **Analysis**

26  
27 Potential exposure to isotretinoin in the 30 days before or during pregnancy was calculated per 10,000  
28 pregnancies for the aforementioned exposure intervals including their 95% confidence intervals (95% CIs). The  
29 proportions of adverse fetal outcome among isotretinoin exposed and unexposed fetuses or neonates were  
30 calculated including their 95% CIs. We used multiple logistic regression models to calculate odds ratios (ORs)  
31 and 95% CIs to estimate associations between adverse fetal or neonatal outcome and maternal isotretinoin  
32 exposure. We adjusted for maternal age at conception (<20, 20-24, 25-29, 30-34,  $\geq$ 35), and if possible also for  
33 calendar time (year of conception) and gender of the infant. Analyses for specific congenital anomalies were  
34 performed when > 3 cases were observed. The t-test or Fisher exact test was used to derive p-values when  
35 comparing continuous or categorical variables between study groups. Statistical significance was assumed for  
36 two-sided p-values <0.05. Statistical analyses were performed using SAS version 9.2 (SAS Institute, Cary, North  
37 Carolina).  
38  
39  
40  
41  
42  
43  
44  
45  
46  
47  
48  
49

### 50 **RESULTS**

51  
52  
53 Between 1 January 1999 and 1 September 2007 in the Netherlands, a total of 203,962 pregnancies  
54 corresponding to 208,161 fetuses (including multiple births) were included in our study. The mean maternal  
55  
56  
57  
58  
59  
60

age at conception was 30.3 years (SD 4.6) and mean duration of pregnancy was 39 weeks and 3 days (SD 19 days).

### Isotretinoin dispensings

A total of 416 isotretinoin dispensings to 130 of the 203,962 women in the 12-months period before or during pregnancy were identified. In 139 of the 416 isotretinoin dispensings (33.4%), the dispensing consisted of > 30 days of isotretinoin use. Figure 1 shows that the percentage of isotretinoin dispensings in the year before or during pregnancy exceeding the maximum duration of 30 days decreased over calendar time from 50% in 2001 to 13% in 2007.

### Isotretinoin exposed pregnancies

Demographics for isotretinoin exposed and unexposed pregnancies are presented in table 1.

**Table 1:** Description of the study population

|                                                                | Isotretinoin exposed*       | Isotretinoin unexposed                            | <i>p</i> -value |
|----------------------------------------------------------------|-----------------------------|---------------------------------------------------|-----------------|
| <i>Pregnancies (N=203,962)</i>                                 | 51                          | 203,911                                           |                 |
| Mean ( $\pm$ SD) maternal age at conception in years (95% CI)  | 29.1 (4.9)<br>(27.8 – 30.5) | 30.3 (4.7)<br>(30.3 – 30.3)                       | 0.56            |
| Mean ( $\pm$ SD) gestational age at delivery in weeks (95% CI) | 39 (25 days)<br>(38 – 40)   | 39, 3 days (19 days)<br>(39, 3 days – 39, 3 days) | 0.33            |
| <i>Fetuses (N=208,161)</i>                                     | 53                          | 208,108                                           |                 |
| Gender (boy %)                                                 | 47.2%<br>(33.3 – 61.1)      | 51.5%<br>(51.3 – 51.7)                            | 0.53            |
| <i>Maternal age at conception in years, N, column %.</i>       |                             |                                                   | 0.37            |
| < 20 years of age                                              | 2 (3.8%)                    | 4,063 (2.0%)                                      |                 |
| $\geq$ 20 -25 years of age                                     | 7 (13.2%)                   | 22,144 (10.6%)                                    |                 |
| $\geq$ 25 -30 years of age                                     | 21 (39.6%)                  | 68,366 (32.9%)                                    |                 |
| $\geq$ 30 -35 years of age                                     | 14 (26.4%)                  | 81,581 (39.2%)                                    |                 |
| $\geq$ 35 years of age                                         | 9 (17.0%)                   | 31,951 (15.4%)                                    |                 |
| <i>Gestational age at delivery, N, column %.</i>               |                             |                                                   | 0.64            |
| < 27 weeks                                                     | 1 (1.9%)                    | 2,198 (1.1%)                                      |                 |
| 27 - 30 weeks                                                  | 1 (1.9%)                    | 1,167 (0.6%)                                      |                 |
| 31-33 weeks                                                    | 0 (0.0%)                    | 2,008 (1.0%)                                      |                 |
| 34-36 weeks                                                    | 3 (5.7%)                    | 7,126 (3.4%)                                      |                 |
| 37-39 weeks                                                    | 12 (22.6%)                  | 50,854 (24.4%)                                    |                 |
| > 39 weeks                                                     | 36 (67.9%)                  | 144,755 (69.5%)                                   |                 |
| Adverse fetal outcome, N;<br>% (95% CI)                        | 5;<br>9.4% (1.3 – 17.6)     | 9,041;<br>4.3% (4.3 – 4.4)                        | 0.08            |

\*in the 30 days before conception or during pregnancy



Overall, 51 pregnancies, 2.5 (95% CI 1.9 to 3.3) per 10,000 pregnancies, were potentially exposed to isotretinoin in the 30 days before conception or during pregnancy, despite the implemented pregnancy prevention programme. Forty-five pregnant women, 2.2 (95% CI 1.6 – 2.9) per 10,000 pregnancies, were estimated to be exposed to isotretinoin during pregnancy of whom 27 (60%) started isotretinoin treatment while already being pregnant. In 18 pregnancies (40%), the conception occurred during isotretinoin treatment. Six pregnancies were identified within one month after isotretinoin discontinuation and were estimated to be exposed only before conception. In 40 out of 203,962 pregnancies, 2.0 (95% CI 1.4 – 2.6) per 10,000 pregnancies, an isotretinoin prescription was filled during pregnancy and 32 pregnancies, 1.6 (95% CI 1.1 – 2.2) per 10,000 pregnancies, received isotretinoin more than once during pregnancy. The number of isotretinoin dispensings per pregnancy ranged from 1 to 7, with a median of 2.5. The estimated isotretinoin exposure per exposure interval is presented in table 2.

**Table 2:** Potential isotretinoin exposed pregnancies per exposure interval

| Isotretinoin exposure interval*                                      | Exposed pregnancies (N=203,962) | Exposed pregnancies per 10,000 pregnancies (95% CI) | Median number of days exposed per pregnancy (range) |
|----------------------------------------------------------------------|---------------------------------|-----------------------------------------------------|-----------------------------------------------------|
| 30 days before conception (30 days period)                           | 23                              | 1.1 (0.7 – 1.7)                                     | 24 (range 3 – 30)                                   |
| 1 <sup>st</sup> trimester (90 days period)                           | 28                              | 1.4 (0.9 – 2.0)                                     | 31 (range 3 – 88)                                   |
| 2 <sup>nd</sup> trimester (90 days period)                           | 25                              | 1.2 (0.8 – 1.8)                                     | 57 (range 1 – 90)                                   |
| 3 <sup>rd</sup> trimester (90-103 days period)                       | 26                              | 1.3 (0.9 – 1.8)                                     | 62 (range 1 – 103)                                  |
| During pregnancy (270 days period)                                   | 45                              | 2.2 (1.6 – 2.9)                                     | 63 (range 3 – 236)                                  |
| 30 days before or during pregnancy (300 days period)                 | 51                              | 2.5 (1.9 – 3.3)                                     | 63 (range 7 – 236)                                  |
| 30 days before or during 1 <sup>st</sup> trimester (120 days period) | 35                              | 1.7 (1.2 – 2.4)                                     | 32 (range 7 – 114)                                  |

CI=Confidence interval.

\*Categories are not mutually exclusive but indicate the number of pregnancies exposed to isotretinoin during that exposure interval

Among the pregnancies estimated to be exposed to isotretinoin during pregnancy (N=45), the number of exposed days during pregnancy ranged from 3 to 236 days with a median of 63 days. Figure 2 shows that the number of women estimated to be exposed to isotretinoin during pregnancy was the highest in 2006 with 3.5 pregnancies (95% CI 1.7 – 6.4) per 10,000 pregnancies.

### Adverse fetal or neonatal outcomes

Independent of isotretinoin exposure, adverse fetal or neonatal outcomes were observed for 9,046 of the 208,161 fetuses (4.4% [95% CI 4.3 – 4.4]). The 51 pregnancies potentially exposed to isotretinoin in 30 days before conception or during pregnancy corresponded to 53 fetuses or neonates including two multiple births. Five of these, all singletons, had an adverse fetal or neonatal outcome (9.4% [95% CI 3.5 – 19.7]). These included three intrauterine deaths and two live born infants with major congenital anomalies (see table 3). Among those potentially exposed during pregnancy only (N=47), 6.4% (95% CI 1.7 – 16.4) had an adverse fetal or neonatal outcome. The odds ratio (OR) for adverse fetal or neonatal outcome after potential isotretinoin exposure in the 30 days before or during pregnancy was 2.3 (95% CI 0.9 – 5.7) after adjustment for maternal age (see table 3). Restricting the analysis to the potential isotretinoin exposure during pregnancy, the adjusted OR of an adverse fetal outcome was 1.5 (95% CI 0.5 – 4.8). The number of cases was too low to allow for adjustments in addition to maternal age. The adjusted OR of any fetal or neonatal outcome was significantly increased at 3.6 (95% CI 1.4 – 9.4) for isotretinoin exposure during the 30 days before or first trimester of pregnancy.

**Table 3:** Odds ratios for adverse fetal and neonatal outcomes and isotretinoin exposure in 30 days before or during pregnancy

| Isotretinoin exposed fetuses                       | Exposed fetuses with adverse outcomes | OR (95% CI)        | Adjusted OR* (95% CI) |
|----------------------------------------------------|---------------------------------------|--------------------|-----------------------|
| During pregnancy (N=47)                            | 3 <sup>†</sup>                        | 1.5<br>(0.5 – 4.8) | 1.5<br>(0.5 – 4.8)    |
| 30 days before or during pregnancy (N=53)          | 5 <sup>†‡</sup>                       | 2.3<br>(0.9 – 5.8) | 2.3<br>(0.9 – 5.7)    |
| 30 days before or 1 <sup>st</sup> trimester (N=35) | 5 <sup>†‡</sup>                       | 3.7<br>(1.4 – 9.5) | 3.6<br>(1.4 – 9.4)    |

CI=confidence interval

\* maternal age in categories (<20, 20-24, 25-29, 30-34, ≥35)

<sup>†</sup> Includes three intrauterine deaths.

- 1) in week 19, potentially exposed first 29 days following conception.
- 2) in week 35, potentially exposed 10 weeks following conception and from week 18 until week 32.
- 3) in week 38, also reported an unspecified septal defect; potentially exposed first 8 days following conception, during week 12 until week 24 and during week 28 until week 38.

<sup>‡</sup> Includes two live born infants with major congenital anomalies.

- 1) Neural tube defect, potentially exposed all 30 days before conception, not after conception.
- 2) Major congenital anomaly not further specified, potentially exposed the first 15 days of the 30 days before conception, not after conception.

### DISCUSSION

This study shows that 2 per 10,000 pregnancies were exposed to isotretinoin despite the PPP which is implemented to prevent isotretinoin use during pregnancy. Although this study was not intended to estimate

1 the teratogenic risks of isotretinoin, adverse fetal and neonatal outcomes potentially related to isotretinoin  
2 exposure were observed. That there are still women who are using isotretinoin during pregnancy despite the  
3 implementation of the PPP is of major concern. Especially since the majority of isotretinoin exposed women  
4 (60%) were already pregnant at the time of first isotretinoin prescription and it seems that pregnancy was not  
5 always excluded before isotretinoin dispensing (box 1). These exposed pregnancies could probably have been  
6 prevented when appropriate pregnancy testing would have been performed. Furthermore, it was earlier  
7 demonstrated that women of reproductive age treated with isotretinoin did not always use effective  
8 contraceptive measures because only up to 59% of these women concomitantly used hormonal  
9 contraceptives.<sup>8,9</sup> Our study showed that compliance with the recommended maximum length of prescription  
10 of 30 days was limited since one third of isotretinoin dispensings exceeded 30 days, which however decreased  
11 from 50% in 1999 to 13% in 2007. Based on these findings it is clear that compliance with the PPP in the  
12 Netherlands between 1999 and 2007 was incomplete. Limited compliance with the PPP was also observed in a  
13 survey among Dutch pharmacists which indicated that in 2007 and 2011, 44% and 49% of pharmacists  
14 respectively checked the use of contraception at every isotretinoin dispensing.<sup>14</sup> The percentage of pharmacists  
15 that asked for negative pregnancy tests was stable with 15% and 16% respectively and is in line with our study  
16 which demonstrated that pregnancy is not always excluded before initiating isotretinoin and result in  
17 isotretinoin exposed pregnancies that could have been prevented. Our study showed that compliance with the  
18 recommended maximum length of prescription of 30 days was limited since one third of isotretinoin  
19 dispensings exceeded 30 days which however decreased from 50% in 1999 to 13% in 2007. Based on these  
20 results it is clear that compliance with the PPP in the Netherlands between 1999 and 2007 was incomplete.  
21 These findings suggest an ongoing need to educate healthcare professionals and patients on the fetal risks of  
22 isotretinoin and the PPP, especially since isotretinoin is mostly used in young women of reproductive age.  
23  
24 Previous studies on isotretinoin use during pregnancy in other Western countries showed comparable results  
25 indicating that limited compliance to the PPP is not restricted to the Netherlands.<sup>6, 15-17</sup> In the United States  
26 (US), the most recent isotretinoin PPP, called iPLEDGE, has been implemented since 2006 and is stricter than  
27 the EU PPP. iPLEDGE is an internet-based system that requires registration of all stakeholders with monthly  
28 updates on prescription, pregnancy tests, contraceptive use, and acknowledgement of risks.<sup>17</sup> The pregnancy  
29 rate among isotretinoin users in the US with the iPLEDGE PPP was estimated at 2.7 per 1,000 treatment  
30 courses and did not change compared to the previous PPP called SMART (System to Manage Accutane Related  
31  
32  
33  
34  
35  
36  
37  
38  
39  
40  
41  
42  
43  
44  
45  
46  
47  
48  
49  
50  
51  
52  
53  
54  
55  
56  
57  
58  
59  
60

1 Teratogenicity) while only small improvements in compliance with contraceptive measures were observed.<sup>17 18</sup>  
2  
3 Apparently, also iPLEDGE does not bring complete security because further restrictive measures as in iPLEDGE  
4  
5 do not seem to improve the results and may add unnecessary burden to the healthcare system since  
6  
7 healthcare professionals and patients need to register and verify information on a monthly basis.<sup>4</sup>  
8  
9

### 10 **Strengths and weaknesses of the study**

11  
12 A strength of this study is that we used a population based design including virtually complete and detailed  
13  
14 drug dispensing data and pregnancy outcome data of a large cohort, which enabled estimating nationwide  
15  
16 isotretinoin exposure rates among pregnant women. A known limitation of using drug dispensing data is that it  
17  
18 does not confirm the actual use of the drug under study and does not provide information on the precise time  
19  
20 window of drug use. In addition, it is likely that women may change or stop their medication use when they  
21  
22 become aware of pregnancy. However, it should be noted that our data show that the majority (80%) of  
23  
24 pregnant women who filled prescriptions for isotretinoin came back for refills, suggesting that they really used  
25  
26 the drug.  
27

28  
29 This study provides no information on spontaneous abortions that occurred until gestational age of 16 weeks  
30  
31 and ETOPs because these data are not captured in the PRN database and these pregnancies were thus not  
32  
33 included in our cohort. This resulted in an underestimation of the number of pregnancies that were potentially  
34  
35 exposed to isotretinoin in the 30 days before or during pregnancy and the adverse fetal and neonatal  
36  
37 outcomes. Studies that estimated the teratogenic risk of isotretinoin using prospectively documented  
38  
39 isotretinoin exposed pregnancies found much higher proportions of pregnancies resulting in spontaneous  
40  
41 abortion, stillbirth or reported congenital malformations i.e. 36% (13 of the 36 fetuses)<sup>3</sup> and 26% (6 of the 23  
42  
43 fetuses)<sup>5</sup>.  
44

45  
46 Without detailed information on drug exposure preferably verified by the patient whether the drug was  
47  
48 actually taken and detailed descriptions of the diagnosed fetal outcome as well as on spontaneous abortions,  
49  
50 the teratogenic risk of isotretinoin could not be accurately estimated. With regard to the adverse fetal  
51  
52 outcomes observed in our study, we cannot exclude that they had an other aetiology than isotretinoin  
53  
54 exposure. Due to the low number of cases it was also not possible to adjust in the statistical analysis for  
55  
56 important confounding factors other than maternal age such as smoking, alcohol intake, previous pregnancy  
57  
58 outcomes and exposure to other potentially teratogenic drugs. Detection bias may also have influenced the  
59  
60

1 incidence and estimated risks of congenital anomalies since more detailed diagnostics might have been used in  
2 pregnancies exposed to isotretinoin compared to the unexposed pregnancies. Nevertheless, the results of our  
3 study are in line with the undisputed embryotoxicity of isotretinoin and suggestive of an increased risks of  
4 adverse fetal or neonatal events when isotretinoin is dispensed for use in the 30 days period before or during  
5 pregnancy.  
6  
7  
8  
9

### 10 **Implications and future research**

11  
12 In the Netherlands, approximately 180,000 pregnancies are reported annually.<sup>19</sup> When extrapolating the 2.2  
13 (95% CI 1.6 – 2.9) per 10,000 women potentially exposed to isotretinoin during pregnancy to a national level,  
14 there would be 29 to 52 isotretinoin-exposed pregnancies per year yielding unnecessary risks for congenital  
15 anomalies and fetal deaths. Therefore, it is in the interest of public health to implement effective PPPs and  
16 improve these measures or their compliance as much as possible to reduce isotretinoin use during pregnancy  
17 to the lowest possible level.  
18  
19  
20  
21  
22  
23  
24  
25  
26

27 With the present study only the period 1999 to 2007 has been evaluated. The past years in the Netherlands,  
28 the PPP is communicated to healthcare professionals via product information,<sup>20</sup> national general practitioner  
29 (GP) standards on treatment of acne,<sup>21</sup> drug prescription and dispensing systems,<sup>22</sup> the website of the Dutch  
30 Medicines Evaluation Board,<sup>23</sup> and the common (national) literature on drug information.<sup>24</sup> Furthermore,  
31 research on isotretinoin use in the Netherlands and the PPP is conducted and published in (inter)national  
32 scientific medical journals.<sup>7-9 14 25-28</sup> Consequently, data after 2007 are needed to judge if attention for the  
33 isotretinoin PPP during recent years has improved the carefulness with which isotretinoin is prescribed and  
34 dispensed.  
35  
36  
37  
38  
39  
40  
41  
42  
43

### 44 **Conclusions**

45  
46 Although a PPP was implemented almost 15 years ago, we showed that there are still pregnancies exposed to  
47 isotretinoin in the Netherlands which could have been prevented if appropriate exclusion of pregnancy before  
48 isotretinoin initiation would have been performed. These findings from the Netherlands add to the evidence  
49 that there is no full compliance to the isotretinoin PPP in many Western countries. Given the limited success of  
50 iPLEDGE, the question is which further measures are able to improve compliance.  
51  
52  
53  
54  
55  
56  
57  
58  
59  
60

**FIGURE LEGENDS**

**Figure 1:** Percentage of isotretinoin dispensings exceeding the maximum duration of 30 days by calendar year

**Figure 2:** Isotretinoin exposed pregnancies per 10,000 pregnancies by calendar year

—— Exposed to isotretinoin in 30 days before or during pregnancy

- - - - Exposed to isotretinoin during pregnancy

**Acknowledgements** The authors would like to thank the Netherlands Perinatal Registry for providing access to their database and contribution to the manuscript.

**Competing interests** All authors have completed the Unified Competing Interest form at [www.icmje.org/coi\\_disclosure.pdf](http://www.icmje.org/coi_disclosure.pdf) and declare that LH and RH are employees of the PHARMO Institute. This independent research institute performs financially supported studies for government and related healthcare authorities and several pharmaceutical companies. MS is leading a research group that sometimes conducts research for pharmaceutical companies. None related to the submitted work; no other relationships or activities that could appear to have influenced the submitted work.

**Details of contributors** Each author participated actively and sufficiently in this study. IZ, RR, LH, MS and BS contributed to the study design and the interpretation of the data. IZ and LH collected and analysed the data. IZ, RR, LH, RH, MS, SS and BS participated in the development and critical review of the manuscript for important intellectual content and provided final approval of the version to be published. A statement that all authors, external and internal, had full access to all of the data (including statistical reports and tables) in the study and can take responsibility for the integrity of the data and the accuracy of the data analysis.

**Ethics approval** Not applicable. The research team did not have access to medical records.

**Funding** This study was supported by the Drug Safety Unit of the Dutch Inspectorate of Health Care.

**Data sharing** No additional data available.

**Transparency** The lead author (IZ) affirms that the manuscript is an honest, accurate, and transparent account of the study being reported; that no important aspects of the study have been omitted; and that any discrepancies from the study as planned (and, if relevant, registered) have been explained.

1           **Copyright** The Corresponding Author has the right to grant on behalf of all authors and does grant on behalf of  
2  
3 all authors, a worldwide licence to the Publishers and its licensees in perpetuity, in all forms, formats and  
4  
5 media (whether known now or created in the future), to i) publish, reproduce, distribute, display and store the  
6  
7 Contribution, ii) translate the Contribution into other languages, create adaptations, reprints, include within  
8  
9 collections and create summaries, extracts and/or, abstracts of the Contribution, iii) create any other derivative  
10  
11 work(s) based on the Contribution, iv) to exploit all subsidiary rights in the Contribution, v) the inclusion of  
12  
13 electronic links from the Contribution to third party material where-ever it may be located; and, vi) licence any  
14  
15 third party to do any or all of the above.  
16  
17  
18  
19  
20  
21  
22  
23  
24  
25  
26  
27  
28  
29  
30  
31  
32  
33  
34  
35  
36  
37  
38  
39  
40  
41  
42  
43  
44  
45  
46  
47  
48  
49  
50  
51  
52  
53  
54  
55  
56  
57  
58  
59  
60

## References

1. European Medicines Agency (EMA). Annex I of the Summary information on a referral opinion following an arbitration pursuant to article 29 of directive 2001/83/EC for isotretinoin. 2003; Accessed 2 May 2013:[http://www.ema.europa.eu/docs/en\\_GB/document\\_library/Referrals\\_document/Isotretinoin\\_29/WC500010881.pdf](http://www.ema.europa.eu/docs/en_GB/document_library/Referrals_document/Isotretinoin_29/WC500010881.pdf)
2. Rosa FW. Teratogenicity of isotretinoin. *Lancet* 1983;2(8348):513.
3. Lammer EJ, Chen DT, Hoar RM, Agnish ND, Benke PJ, Braun JT, et al. Retinoic acid embryopathy. *N Engl J Med* 1985;313(14):837-41.
4. Abroms L, Maibach E, Lyon-Daniel K, Feldman SR. What is the best approach to reducing birth defects associated with isotretinoin? *PLoS Med* 2006;3(11):e483.
5. Schaefer C, Meister R, Weber-Schoendorfer C. Isotretinoin exposure and pregnancy outcome: an observational study of the Berlin Institute for Clinical Teratology and Drug Risk Assessment in Pregnancy. *Arch Gynecol Obstet* 2010;281(2):221-7.
6. Autret-Leca E, Kreft-Jais C, Elefant E, Cissoko H, Darrouzain F, Grimaldi-Bensouda L, et al. Isotretinoin exposure during pregnancy: assessment of spontaneous reports in France. *Drug Saf* 2010;33(8):659-65.
7. Crijns I, Straus S, Luteijn M, Gispens-de Wied C, Raine J, de Jong-van den Berg L. Implementation of the harmonized EU isotretinoin Pregnancy Prevention Programme: a questionnaire survey among European regulatory agencies. *Drug Saf* 2012;35(1):27-32.
8. Teichert M, Visser LE, Dufour M, Rodenburg E, Straus SM, De Smet PA, et al. Isotretinoin use and compliance with the Dutch Pregnancy Prevention Programme: a retrospective cohort study in females of reproductive age using pharmacy dispensing data. *Drug Saf* 2010;33(4):315-26.
9. Crijns HJ, van Rein N, Gispens-de Wied CC, Straus SM, de Jong-van den Berg LT. Prescriptive contraceptive use among isotretinoin users in the Netherlands in comparison with non-users: a drug utilisation study. *Pharmacoepidemiol Drug Saf* 2012;21(10):1060-6.
10. Herings RM, Bakker A, Stricker BH, Nap G. Pharmaco-morbidity linkage: a feasibility study comparing morbidity in two pharmacy based exposure cohorts. *J Epidemiol Community Health* 1992;46(2):136-40.
11. WHO Collaborating Centre for Drug Statistics Methodology. Anatomical Therapeutic Chemical (ATC) index with Defined Daily Doses (DDDs). Accessed 4 October 2013:[http://www.whocc.no/atc\\_ddd\\_index/](http://www.whocc.no/atc_ddd_index/)
12. Stichting Perinatale Registratie Nederland. *Grote Lijnen 10 jaar Perinatale Registratie Nederland*. Utrecht: Stichting Perinatale Registratie Nederland, 2011.
13. Houweling LM, Bezemer ID, Penning-van Beest FJ, Meijer WM, van Lingen RA, Herings RM. First year of life medication use and hospital admission rates: premature compared with term infants. *J Pediatr* 2013;163(1):61-6 e1.
14. Crijns I, Mantel-Teeuwisse A, Bloemberg R, Pinas E, Straus S, de Jong-van den Berg L. Healthcare professional surveys to investigate the implementation of the isotretinoin Pregnancy Prevention Programme: a descriptive study. *Expert Opin Drug Saf* 2013;12(1):29-38.
15. Berard A, Azoulay L, Koren G, Blais L, Perreault S, Oraichi D. Isotretinoin, pregnancies, abortions and birth defects: a population-based perspective. *Br J Clin Pharmacol* 2007;63(2):196-205.
16. Bensouda-Grimaldi L, Jonville-Bera AP, Mouret E, Elefant E, Dhellot H, Delmas C, et al. Isotretinoin: compliance with recommendations in childbearing women. *Ann Dermatol Venereol* 2005;132(5):415-23.
17. Pinheiro SP, Kang EM, Kim CY, Governale LA, Zhou EH, Hammad TA. Concomitant use of isotretinoin and contraceptives before and after iPledge in the United States. *Pharmacoepidemiol Drug Saf* 2013;22(12):1251-7.
18. Shin J, Cheetham TC, Wong L, Niu F, Kass E, Yoshinaga MA, et al. The impact of the iPLEDGE program on isotretinoin fetal exposure in an integrated health care system. *J Am Acad Dermatol* 2011;65(6):1117-25.
19. Stichting Perinatale Registratie Nederland. *Grote Lijnen 1999 - 2012*. Utrecht: Stichting Perinatale Registratie Nederland, 2013.
20. Roaccutane Summary of Product Characteristics. Accessed 3 January 2014:<http://db.cbg-meb.nl/IB-teksten/h10305.pdf>
21. Smeets JG GS, Bruinsma, et al. NHG-standard acne. *Huisarts wet* 2007;50:259-68.
22. Implementatie Bijzonder Kenmerk: 'Let op zwangerschapspreventieprogramma' in Z-index. 2009; Accessed 3 March 2014:<https://www.z-index.nl/g-standaard/beschrijvingen/functioneel/wijzigingen/mb/bijzondere-kenmerken/IR%20BK%20Zwangerschapspreventieprogramma%20V-1-1-1.pdf>
23. College ter Beoordeling van Geneesmiddelen / Medicines Evaluation Board (CBG/MEB). Zwangerschapspreventie programma's (ZPP). Accessed 3 March 2014:<http://www.cbg-meb.nl/CBG/nl/humane-geneesmiddelen/geneesmiddelenbew/zwangerschapspreventieprogramma/default.htm>



- 1 24. Commissie Farmaceutische Hulp. Isotretinoïne: waarschuwingen en voorzorgen. . *Farmacotherapeutisch*  
2 *kompas. College van Zorgverzekeringen* 2007.
- 3 25. Crijns HJ, Straus SM, Gispen-de Wied C, de Jong-van den Berg LT. Compliance with pregnancy prevention  
4 programmes of isotretinoin in Europe: a systematic review. *Br J Dermatol* 2011;164(2):238-44.
- 5 26. Fledderus S. Zwangerschapspreventie bij teratogene middelen faalt. *Medisch Contact*, 2012;48.
- 6 27. Manders KC, de Vries LC, Roumen FJ. Pregnancy after isotretinoin use. *Ned Tijdschr Geneesk*  
7 2013;157(41):A6567.
- 8 28. Crijns HJ. Teratogene middelen: zwangerschapspreventie kan beter. *Pharmaceutisch Weekblad (PW)*,  
9 2012;October.
- 10  
11  
12  
13  
14  
15  
16  
17  
18  
19  
20  
21  
22  
23  
24  
25  
26  
27  
28  
29  
30  
31  
32  
33  
34  
35  
36  
37  
38  
39  
40  
41  
42  
43  
44  
45  
46  
47  
48  
49  
50  
51  
52  
53  
54  
55  
56  
57  
58  
59  
60

For peer review only

1 **Isotretinoin exposure during pregnancy: a population-based study in the Netherlands**

2  
3  
4  
5 Inge M Zomerdijk, Rikje Ruiten, Leanne MA Houweling, Ron MC Herings, Miriam CJM Sturkenboom, Sabine  
6 MJM Straus, Bruno H Stricker

7  
8  
9  
10 Department of Medical Informatics, Erasmus University Medical Center, Dr. Molewaterplein 50, 3015 GE,  
11 Rotterdam, The Netherlands Inge M Zomerdijk

12 PhD candidate

13  
14 Internal medicine, GHZ, Bleulandweg 10, 2803 HH, Gouda, the Netherlands Rikje Ruiten  
15 medical doctor

16  
17 PHARMO Institute for Drug Outcomes Research, Van Deventerlaan 30-40, 3528 AE Utrecht, The Netherlands

18 Leanne MA Houweling

19 business development manager

20  
21 PHARMO Institute for Drug Outcomes Research, Van Deventerlaan 30-40, 3528 AE Utrecht, The Netherlands

22  
23 Ron MC Herings

24 director

25  
26 Department of Medical Informatics, Erasmus University Medical Center, Dr. Molewaterplein 50, 3015 GE,  
27 Rotterdam, The Netherlands Miriam CJM Sturkenboom

28 professor

29  
30 Department of Medical Informatics, Erasmus University Medical Center, Dr. Molewaterplein 50, 3015 GE,  
31 Rotterdam, The Netherlands Sabine MJM Straus

32 associate professor

33  
34 Department of Epidemiology, Erasmus University Medical Center, Dr. Molewaterplein 50, 3015 GE, Rotterdam,  
35 The Netherlands Bruno H Stricker

36  
37 professor

38  
39  
40  
41 Correspondence to: Bruno H Stricker [b.stricker@erasmusmc.nl](mailto:b.stricker@erasmusmc.nl)

42 Department of Epidemiology, Erasmus University Medical Centre, P.O. Box 2040, 3000 CA Rotterdam, The  
43 Netherlands.

44  
45  
46  
47 key words: isotretinoin, pregnancy prevention programme, teratogens, congenital malformations

48  
49  
50 Word count: 3580 words

**ABSTRACT**

**Objective** To estimate isotretinoin exposure in Dutch pregnant women despite the implemented pregnancy prevention programme (PPP) and secondly, to analyse the occurrence of adverse fetal or neonatal outcomes in these isotretinoin exposed pregnancies.

**Design** Population based study

**Setting** the Netherlands

**Participants** a cohort of 203,962 pregnancies with onset between 1 January 1999 and 1 September 2007 consisting of 208,161 fetuses or neonates.

**Main outcome measures** Isotretinoin exposure in the 30 days before or during pregnancy. Proportions of adverse fetal or neonatal outcomes, defined as intrauterine deaths  $\geq$  16 week of gestation and neonates with major congenital anomalies. Odds ratios (ORs) with 95% confidence intervals (CI) adjusted for maternal age were calculated to estimate the risk of adverse fetal or neonatal outcome after maternal isotretinoin exposure.

**Results** 51 pregnancies, 2.5 (95%CI 1.9 to 3.3) per 10,000 pregnancies, were exposed to isotretinoin despite the pregnancy prevention programme. 45 of these pregnancies, 2.2 (95%CI 1.6 to 2.9) per 10,000 pregnancies, were exposed to isotretinoin during pregnancy and six additional women became pregnant within 30 days after isotretinoin discontinuation. In sixty percent of isotretinoin exposed pregnancies, women started isotretinoin while already pregnant. In five out of the 51 isotretinoin exposed pregnancies, 9.4% (95%CI 1.3 to 17.6), had an adverse fetal or neonatal outcome. The OR for adverse fetal or neonatal outcomes after isotretinoin exposure in 30 days before or during pregnancy was 2.3 (95%CI 0.9 to 5.7) after adjustment for maternal age.

**Conclusions** Although a PPP was already implemented in 1988, we showed that isotretinoin exposed pregnancies ~~in the Netherlands~~ and adverse fetal and neonatal events potentially related to the exposure still occur. These findings from the Netherlands add to the evidence that there is no full compliance to the isotretinoin PPP in many Western countries. Given the limited success of iPLEDGE, the question is which further measures are able to improve compliance.

**ARTICLE SUMMARY****Strengths and limitations of this study**

- This is the first population-based study in the EU on isotretinoin exposure during pregnancy in a large cohort of more than 200,000 pregnancies which enabled estimating isotretinoin exposure rates among pregnant women and its consequences on a nationwide scale.
- From the virtually complete and detailed drug dispensing data, isotretinoin exposure could only be estimated since drug dispensing data does not ascertain actual drug use and precise exposure intervals. However, patients coming for refills are usually taking their drug.
- Spontaneous abortions before gestational age of 16 weeks and elective abortions were not included in our cohort and therefore our results probably underestimate the number of isotretinoin exposed pregnancies and its consequences.
- ~~The analysis was restricted to adverse fetal and neonatal outcomes in general since~~ specific teratogenic risks could not be estimated with data lacking information on pregnancies until 16 weeks of gestation and lacking detailed descriptions of adverse fetal and neonatal outcomes.

## INTRODUCTION

Isotretinoin, a vitamin A derivative, is licensed in the European Union (EU) since 1983 and is indicated for systemic treatment of severe acne (such as nodular or conglobate acne or acne at risk of permanent scarring) in patients resistant to adequate courses of standard therapy with systemic antibacterials and topical therapy.<sup>1</sup> The teratogenic potential is an important characteristic of isotretinoin. Animal studies already suggested teratogenic effects in humans and isotretinoin has been contraindicated for use during pregnancy since the very beginning of the marketing authorisation. Despite this contraindication, the first cases of congenital anomalies after isotretinoin use during pregnancy were documented already in 1983.<sup>2</sup> As described by Lammer et al. in 1985, isotretinoin embryopathy consists of craniofacial, cardiac, thymic and central nervous system (CNS) defects.<sup>3</sup> They found a relative risk of 26 for this group of major congenital malformations after systemic isotretinoin exposure during some parts of the first 10 weeks after conception.<sup>3</sup> Elective termination of pregnancy (ETOP) was decided in more than 50% of exposed pregnancies and 20% of the remaining pregnancies ended in a first trimester spontaneous abortion.<sup>3</sup> Reports of congenital anomalies after isotretinoin use accumulated and consequently, in 1988 the marketing authorisation holder of isotretinoin implemented a world-wide Pregnancy Prevention Programme (PPP) to better prevent pregnancies among systemic isotretinoin users.<sup>4</sup> The PPP included an educational programme for prescribers and patients including material to be used in counselling women about the need to prevent pregnancy while taking isotretinoin. Conditions for prescribing included a negative pregnancy test, the use of reliable contraception and a signed patient consent form.<sup>4</sup> In 2003, a review of isotretinoin by the European Medicine Agency (EMA) resulted in a compulsory European harmonised PPP for all isotretinoin containing products.<sup>1</sup> The elements of the European wide PPP are listed in box 1.

### **Box 1:** Elements of the EU isotretinoin PPP

---

1. Isotretinoin is contraindicated in pregnant women and should only be initiated in women of reproductive age who understand the teratogenic risk and the need for regular follow-up
  2. Use of effective contraceptive measures from four weeks before isotretinoin initiation until four weeks after treatment discontinuation. At least one and preferably two complementary forms of contraception including a barrier method should be used.
  3. Pregnancy testing should be done before, during and five weeks after discontinuation of isotretinoin
  4. Isotretinoin should only be prescribed by or under the supervision of a physician with experience in the use of systemic retinoids
  5. Prescription should be limited to 30 days of treatment and continuation of treatment requires a new prescription.
  6. Dispensing of isotretinoin should occur within a maximum of seven days after prescription.
  7. Educational programmes for healthcare professionals including prescribers and pharmacists, and patients are in place to inform them about the teratogenic risk and to create awareness of the PPP.
-

1 The safe use of isotretinoin in women of reproductive age is in the interest of public health because of the  
2 potential risk of spontaneous and elective abortions, and, more importantly, children with major congenital  
3 anomalies require continuous healthcare throughout their life. Although a PPP has been implemented in the  
4 EU, pregnancies during isotretinoin therapy still occur.<sup>5,6</sup> The regulatory authorities of sixteen EU member  
5 states responded in 2009 to a survey that isotretinoin exposed pregnancies have occurred in their country.<sup>7</sup> A  
6 French study between 2003 and 2006 estimated a pregnancy rate from 0.4 to 1.2 per 1000 female isotretinoin  
7 users within reproductive age.<sup>6</sup> Studies in the Netherlands observed that only 52% to 59% of the female  
8 isotretinoin users of reproductive age used concomitant hormonal contraceptives, which was higher than the  
9 39%-46% observed in the general female population of similar age, but lower than anticipated.<sup>8,9</sup> Although  
10 these studies show limited compliance with the isotretinoin PPP, it is not known whether isotretinoin exposure  
11 also occurs during pregnancy and what the outcome of these pregnancies is. Therefore, the objective of our  
12 study was to estimate isotretinoin exposure in Dutch pregnant women despite the implemented PPP and  
13 secondly, to analyse the occurrence of adverse fetal and neonatal outcomes in these isotretinoin exposed  
14 pregnancies.

## 28 **METHODS**

### 29 **Data sources**

30 For this population based study a cohort of 203,962 pregnancies consisting of 208,161 fetuses was constructed  
31 using a linkage between the PHARMO Database Network and the Netherlands Perinatal Registry (PRN). The  
32 PHARMO Database Network is a dynamic population-based cohort including, amongst other information, drug-  
33 dispensing records from community pharmacies for more than 3 million individuals in the Netherlands  
34 (approximately 20% of the Dutch population) that are collected since 1986.<sup>10</sup> The drug dispensing data contain  
35 the following information per prescription: the Anatomical Therapeutic Chemical (ATC) classification of the  
36 drug, dispensing date, regimen, quantity dispensed and estimated length of duration of use.<sup>11</sup> The PRN is a  
37 nationwide registry that contains linked and validated data from four databases: the national obstetric  
38 database for midwives (LVR-1), the national obstetric database for gynaecologists (LVR-2), the national  
39 obstetric database for general practitioners (LVR-h) and the national neonatal/paediatric database (LNR).<sup>12</sup> The  
40 registry contains information about care before, during, and after delivery as well as maternal and neonatal  
41 characteristics and outcome of 95% of 180,000 pregnancies annually in the Netherlands with a gestational age  
42 of at least 16 weeks. The PRN includes information on pregnancy outcome including congenital anomalies

1 detected during pregnancy, at birth or within the first year after birth. The probabilistic linking method  
2  
3 between PHARMO and PRN has been described in detail elsewhere but was generally based on the birth date  
4  
5 of the mother and child and their postal zip codes.<sup>13</sup> To be included in the cohort the mother should be  
6  
7 registered in the community pharmacy database of PHARMO during the whole pregnancy. The date of  
8  
9 conception was estimated based on the last menstrual period or ultrasound, as recorded in the PRN, and was  
10  
11 truncated to full weeks.

### 12 13 **Isotretinoin dispensings**

14  
15 All dispensings for systemic (oral) isotretinoin (ATC D10BA01) filled in community pharmacies by women  
16  
17 included in our cohort within the 12-months period before or during pregnancy were extracted from the  
18  
19 PHARMO Database Network. Considering a daily dosage of 0.5 mg-1mg per kilogram daily,<sup>1</sup> isotretinoin  
20  
21 prescriptions dispensed on the same day were assumed to be used simultaneously and therefore these  
22  
23 dispensings were pooled and considered as one dispensing (e.g. the prescriptions of a 10 mg and 20 mg tablets  
24  
25 dispensed at the same time to reach a daily dosage of 30mg). For each isotretinoin dispensing, the length of  
26  
27 the dispensing was calculated by dividing the total number of prescribed units by the number of units (doses)  
28  
29 to be taken per day. In case isotretinoin dispensings that were pooled together had different lengths, the  
30  
31 length of the single dispensing with the longest duration was used. To assess compliance with the PPP, we  
32  
33 calculated the proportion of dispensings that exceeded 30 days, which is the maximum length according to the  
34  
35 EU PPP.  
36  
37

### 38 39 **Drug exposure interval**

40  
41 For all pregnancies (N=203,962) with of gestational age of at least 16 weeks included in the cohort, isotretinoin  
42  
43 exposure was estimated based on isotretinoin dispensing data (ATC D10BA01) filled by the mother during the  
44  
45 12-months period before and during pregnancy. Exposure in person time (days) was calculated by dividing the  
46  
47 total number of prescribed units by the number of prescribed units per day. Isotretinoin exposure periods were  
48  
49 defined considering a possible overlap of isotretinoin dispensings. Gaps, isotretinoin free periods between two  
50  
51 isotretinoin dispensings, were not permitted meaning that an isotretinoin exposure period ends once an  
52  
53 isotretinoin free period was identified. Using the start and end date of the isotretinoin exposure period, the  
54  
55 number of days exposed was estimated for the following exposure intervals: 30 days before conception, first  
56  
57 90 days of gestation (first trimester), day 90-179 of gestation (second trimester) and day 180 – delivery (third  
58  
59  
60

1 trimester). In addition, the entire period 30 days before pregnancy until delivery as well as the period from 30  
2  
3 days before till the end of the first trimester were analysed separately.  
4

### 5 **Adverse fetal or neonatal outcomes**

6  
7  
8 For each fetus (N=208,161), we determined whether adverse fetal or neonatal outcomes were reported.  
9  
10 Adverse fetal or neonatal outcomes were defined as all intrauterine deaths  $\geq$  16 week of gestation and live  
11  
12 born infants with major congenital anomalies. If possible, congenital anomalies were categorised into nine sub-  
13  
14 groups: abdominal wall and skin disorders; cardiovascular defects; defects in the digestive system; defects in  
15  
16 the nervous system; musculoskeletal defects; respiratory defects; urogenital defects; multiple, syndrome or  
17  
18 chromosomal anomalies; or other congenital malformations. As we were interested in adverse fetal outcomes  
19  
20 potentially induced by maternal drug exposure, chromosomal anomalies were not considered as an adverse  
21  
22 outcome in the analyses.  
23

### 24 **Analysis**

25  
26  
27 Potential exposure to isotretinoin in the 30 days before or during pregnancy was calculated per 10,000  
28  
29 pregnancies for the aforementioned exposure intervals including their 95% confidence intervals (95% CIs). The  
30  
31 proportions of adverse fetal outcome among isotretinoin exposed and unexposed fetuses or neonates were  
32  
33 calculated including their 95% CIs. We used multiple logistic regression models to calculate odds ratios (ORs)  
34  
35 and 95% CIs to estimate associations between adverse fetal or neonatal outcome and maternal isotretinoin  
36  
37 exposure. We adjusted for maternal age at conception (<20, 20-24, 25-29, 30-34,  $\geq$ 35), and if possible also for  
38  
39 calendar time (year of conception) and gender of the infant. Analyses for specific congenital anomalies were  
40  
41 performed when > 3 cases were observed. The t-test or Fisher exact test was used to derive p-values when  
42  
43 comparing continuous or categorical variables between study groups. Statistical significance was assumed for  
44  
45 two-sided p-values <0.05. Statistical analyses were performed using SAS version 9.2 (SAS Institute, Cary, North  
46  
47 Carolina).  
48

### 49 **RESULTS**

50  
51  
52 Between 1 January 1999 and 1 September 2007 in the Netherlands, a total of 203,962 pregnancies  
53  
54 corresponding to 208,161 fetuses (including multiple births) were included in our study. The mean maternal  
55  
56  
57  
58  
59  
60



age at conception was 30.3 years (SD 4.6) and mean duration of pregnancy was 39 weeks and 3 days (SD 19 days).

### Isotretinoin dispensings

A total of 416 isotretinoin dispensings to 130 of the 203,962 women in the 12-months period before or during pregnancy were identified. In 139 of the 416 isotretinoin dispensings (33.4%), the dispensing consisted of > 30 days of isotretinoin use. Figure 1 shows that the percentage of isotretinoin dispensings in the year before or during pregnancy exceeding the maximum duration of 30 days decreased over calendar time from 50% in 2001 to 13% in 2007.

### Isotretinoin exposed pregnancies

Demographics for isotretinoin exposed and unexposed pregnancies are presented in table 1.

**Table 1:** Description of the study population

|                                                                | Isotretinoin exposed*       | Isotretinoin unexposed                            | <i>p</i> -value |
|----------------------------------------------------------------|-----------------------------|---------------------------------------------------|-----------------|
| <i>Pregnancies (N=203,962)</i>                                 | 51                          | 203,911                                           |                 |
| Mean ( $\pm$ SD) maternal age at conception in years (95% CI)  | 29.1 (4.9)<br>(27.8 – 30.5) | 30.3 (4.7)<br>(30.3 – 30.3)                       | 0.56            |
| Mean ( $\pm$ SD) gestational age at delivery in weeks (95% CI) | 39 (25 days)<br>(38 – 40)   | 39, 3 days (19 days)<br>(39, 3 days – 39, 3 days) | 0.33            |
| <i>Fetuses (N=208,161)</i>                                     | 53                          | 208,108                                           |                 |
| Gender (boy %)                                                 | 47.2%<br>(33.3 – 61.1)      | 51.5%<br>(51.3 – 51.7)                            | 0.53            |
| <i>Maternal age at conception in years, N, column %.</i>       |                             |                                                   | 0.37            |
| < 20 years of age                                              | 2 (3.8%)                    | 4,063 (2.0%)                                      |                 |
| $\geq$ 20 -25 years of age                                     | 7 (13.2%)                   | 22,144 (10.6%)                                    |                 |
| $\geq$ 25 -30 years of age                                     | 21 (39.6%)                  | 68,366 (32.9%)                                    |                 |
| $\geq$ 30 -35 years of age                                     | 14 (26.4%)                  | 81,581 (39.2%)                                    |                 |
| $\geq$ 35 years of age                                         | 9 (17.0%)                   | 31,951 (15.4%)                                    |                 |
| <i>Gestational age at delivery, N, column %.</i>               |                             |                                                   | 0.64            |
| < 27 weeks                                                     | 1 (1.9%)                    | 2,198 (1.1%)                                      |                 |
| 27 - 30 weeks                                                  | 1 (1.9%)                    | 1,167 (0.6%)                                      |                 |
| 31-33 weeks                                                    | 0 (0.0%)                    | 2,008 (1.0%)                                      |                 |
| 34-36 weeks                                                    | 3 (5.7%)                    | 7,126 (3.4%)                                      |                 |
| 37-39 weeks                                                    | 12 (22.6%)                  | 50,854 (24.4%)                                    |                 |
| > 39 weeks                                                     | 36 (67.9%)                  | 144,755 (69.5%)                                   |                 |
| Adverse fetal outcome, N;<br>% (95% CI)                        | 5;<br>9.4% (1.3 – 17.6)     | 9,041;<br>4.3% (4.3 – 4.4)                        | 0.08            |

\*in the 30 days before conception or during pregnancy

Overall, 51 pregnancies, 2.5 (95% CI 1.9 to 3.3) per 10,000 pregnancies, were potentially exposed to isotretinoin in the 30 days before conception or during pregnancy, despite the implemented pregnancy prevention programme. Forty-five pregnant women, 2.2 (95% CI 1.6 – 2.9) per 10,000 pregnancies, were estimated to be exposed to isotretinoin during pregnancy of whom 27 (60%) started isotretinoin treatment while already being pregnant. In 18 pregnancies (40%), the conception occurred during isotretinoin treatment. Six pregnancies were identified within one month after isotretinoin discontinuation and were estimated to be exposed only before conception. In 40 out of 203,962 pregnancies, 2.0 (95% CI 1.4 – 2.6) per 10,000 pregnancies, an isotretinoin prescription was filled during pregnancy and 32 pregnancies, 1.6 (95% CI 1.1 – 2.2) per 10,000 pregnancies, received isotretinoin more than once during pregnancy. The number of isotretinoin dispensings per pregnancy ranged from 1 to 7, with a median of 2.5. The estimated isotretinoin exposure per exposure interval is presented in table 2.

**Table 2:** Potential isotretinoin exposed pregnancies per exposure interval

| Isotretinoin exposure interval*                                      | Exposed pregnancies (N=203,962) | Exposed pregnancies per 10,000 pregnancies (95% CI) | Median number of days exposed per pregnancy (range) |
|----------------------------------------------------------------------|---------------------------------|-----------------------------------------------------|-----------------------------------------------------|
| 30 days before conception (30 days period)                           | 23                              | 1.1 (0.7 – 1.7)                                     | 24 (range 3 – 30)                                   |
| 1 <sup>st</sup> trimester (90 days period)                           | 28                              | 1.4 (0.9 – 2.0)                                     | 31 (range 3 – 88)                                   |
| 2 <sup>nd</sup> trimester (90 days period)                           | 25                              | 1.2 (0.8 – 1.8)                                     | 57 (range 1 – 90)                                   |
| 3 <sup>rd</sup> trimester (90-103 days period)                       | 26                              | 1.3 (0.9 – 1.8)                                     | 62 (range 1 – 103)                                  |
| During pregnancy (270 days period)                                   | 45                              | 2.2 (1.6 – 2.9)                                     | 63 (range 3 – 236)                                  |
| 30 days before or during pregnancy (300 days period)                 | 51                              | 2.5 (1.9 – 3.3)                                     | 63 (range 7 – 236)                                  |
| 30 days before or during 1 <sup>st</sup> trimester (120 days period) | 35                              | 1.7 (1.2 – 2.4)                                     | 32 (range 7 – 114)                                  |

CI=Confidence interval.

\*Categories are not mutually exclusive but indicate the number of pregnancies exposed to isotretinoin during that exposure interval

Among the pregnancies estimated to be exposed to isotretinoin during pregnancy (N=45), the number of exposed days during pregnancy ranged from 3 to 236 days with a median of 63 days. Figure 2 shows that the number of women estimated to be exposed to isotretinoin during pregnancy was the highest in 2006 with 3.5 pregnancies (95% CI 1.7 – 6.4) per 10,000 pregnancies.

### Adverse fetal or neonatal outcomes

Independent of isotretinoin exposure, adverse fetal or neonatal outcomes were observed for 9,046 of the 208,161 fetuses (4.4% [95% CI 4.3 – 4.4]). The 51 pregnancies potentially exposed to isotretinoin in 30 days before conception or during pregnancy corresponded to 53 fetuses or neonates including two multiple births. Five of these, all singletons, had an adverse fetal or neonatal outcome (9.4% [95% CI 3.5 – 19.7]). These included three intrauterine deaths and two live born infants with major congenital anomalies (see table 3). Among those potentially exposed during pregnancy only (N=47), 6.4% (95% CI 1.7 – 16.4) had an adverse fetal or neonatal outcome. The odds ratio (OR) for adverse fetal or neonatal outcome after potential isotretinoin exposure in the 30 days before or during pregnancy was 2.3 (95% CI 0.9 – 5.7) after adjustment for maternal age (see table 3). Restricting the analysis to the potential isotretinoin exposure during pregnancy, the adjusted OR of an adverse fetal outcome was 1.5 (95% CI 0.5 – 4.8). The number of cases was too low to allow for adjustments in addition to maternal age. The adjusted OR of any fetal or neonatal outcome was significantly increased at 3.6 (95% CI 1.4 – 9.4) for isotretinoin exposure during the 30 days before or first trimester of pregnancy.

**Table 3:** Odds ratios for adverse fetal and neonatal outcomes and isotretinoin exposure in 30 days before or during pregnancy

| Isotretinoin exposed fetuses                       | Exposed fetuses with adverse outcomes | OR (95% CI)        | Adjusted OR* (95% CI) |
|----------------------------------------------------|---------------------------------------|--------------------|-----------------------|
| During pregnancy (N=47)                            | 3 <sup>†</sup>                        | 1.5<br>(0.5 – 4.8) | 1.5<br>(0.5 – 4.8)    |
| 30 days before or during pregnancy (N=53)          | 5 <sup>†‡</sup>                       | 2.3<br>(0.9 – 5.8) | 2.3<br>(0.9 – 5.7)    |
| 30 days before or 1 <sup>st</sup> trimester (N=35) | 5 <sup>†‡</sup>                       | 3.7<br>(1.4 – 9.5) | 3.6<br>(1.4 – 9.4)    |

CI=confidence interval

\* maternal age in categories (<20, 20-24, 25-29, 30-34, ≥35)

† Includes three intrauterine deaths.

- 1) in week 19, potentially exposed first 29 days following conception.
- 2) in week 35, potentially exposed 10 weeks following conception and from week 18 until week 32.
- 3) in week 38, also reported an unspecified septal defect; potentially exposed first 8 days following conception, during week 12 until week 24 and during week 28 until week 38.

‡ Includes two live born infants with major congenital anomalies.

- 1) Neural tube defect, potentially exposed all 30 days before conception, not after conception.
- 2) Major congenital anomaly not further specified, potentially exposed the first 15 days of the 30 days before conception, not after conception.

### DISCUSSION

This study shows that 2 per 10,000 pregnancies were exposed to isotretinoin despite the PPP which is implemented to prevent isotretinoin use during pregnancy. Although this study was not intended to estimate

1 the teratogenic risks of isotretinoin, adverse fetal and neonatal outcomes potentially related to isotretinoin  
2 exposure among these exposed pregnancies were observed. That there are still women who are using  
3 isotretinoin during pregnancy despite the implementation of the PPP is of major concern. Especially since the  
4 majority of isotretinoin exposed women (60%) were already pregnant at the time of first isotretinoin  
5 prescription and it seems that pregnancy was not always excluded before isotretinoin dispensing (box 1). These  
6 exposed pregnancies could probably have been prevented when appropriate pregnancy testing would have  
7 been performed. Furthermore, it was earlier demonstrated that women of reproductive age treated with  
8 isotretinoin did not always use effective contraceptive measures because only up to 59% of these women  
9 concomitantly used hormonal contraceptives.<sup>8,9</sup> Our study showed that compliance with the recommended  
10 maximum length of prescription of 30 days was limited since one third of isotretinoin dispensings exceeded 30  
11 days, which however decreased from 50% in 1999 to 13% in 2007. Based on these findings it is clear that  
12 compliance with the PPP in the Netherlands between 1999 and 2007 was incomplete. Limited compliance with  
13 the PPP was also observed in a survey among Dutch pharmacists which indicated that in 2007 and 2011, 44%  
14 and 49% of pharmacists respectively checked the use of contraception at every isotretinoin dispensing.<sup>14</sup> The  
15 percentage of pharmacists that asked for negative pregnancy tests was stable with 15% and 16% respectively  
16 and is in line with our study which demonstrated that pregnancy is not always excluded before initiating  
17 isotretinoin and result in isotretinoin exposed pregnancies that could have been prevented. Our study showed  
18 that compliance with the recommended maximum length of prescription of 30 days was limited since one third  
19 of isotretinoin dispensings exceeded 30 days which however decreased from 50% in 1999 to 13% in 2007.  
20 Based on these results it is clear that compliance with the PPP in the Netherlands between 1999 and 2007 was  
21 incomplete. These findings suggest an ongoing need to educate healthcare professionals and patients on the  
22 fetal risks of isotretinoin and the PPP, especially since isotretinoin is mostly used in young women of  
23 reproductive age.

24  
25  
26  
27  
28  
29  
30  
31  
32  
33  
34  
35  
36  
37  
38  
39  
40  
41  
42  
43  
44  
45  
46  
47 Previous studies on isotretinoin use during pregnancy in other Western countries showed comparable results  
48 indicating that limited compliance to the PPP is not restricted to the Netherlands.<sup>6,15-17</sup> In the United States  
49 (US), the most recent isotretinoin PPP, called iPLEDGE, has been implemented since 2006 and is stricter than  
50 the EU PPP. iPLEDGE is an internet-based system that requires registration of all stakeholders with monthly  
51 updates on prescription, pregnancy tests, contraceptive use, and acknowledgement of risks.<sup>17</sup> The pregnancy  
52 rate among isotretinoin users in the US with the iPLEDGE PPP was estimated at 2.7 per 1,000 treatment  
53  
54  
55  
56  
57  
58  
59  
60

1 courses and did not change compared to the previous PPP called SMART (System to Manage Accutane Related  
2 Teratogenicity) while only small improvements in compliance with contraceptive measures were observed.<sup>17 18</sup>  
3  
4 Apparently, also iPLEDGE does not bring complete security because further restrictive measures as in iPLEDGE  
5  
6 do not seem to improve the results and may add unnecessary burden to the healthcare system since  
7  
8 healthcare professionals and patients need to register and verify information on a monthly basis.<sup>4</sup>  
9  
10

### 11 **Strengths and weaknesses of the study**

12  
13 A strength of this study is that we used a population based design including virtually complete and detailed  
14  
15 drug dispensing data and pregnancy outcome data of a large cohort, which enabled estimating nationwide  
16  
17 isotretinoin exposure rates among pregnant women. A known limitation of using drug dispensing data is that it  
18  
19 does not confirm the actual use of the drug under study and does not provide information on the precise time  
20  
21 window of drug use. In addition, it is likely that women may change or stop their medication use when they  
22  
23 become aware of pregnancy. However, it should be noted that our data show that the majority (80%) of  
24  
25 pregnant women who filled prescriptions for isotretinoin came back for refills, suggesting that they really used  
26  
27 the drug.  
28  
29

30  
31 This study provides no information on spontaneous abortions that occurred until gestational age of 16 weeks  
32  
33 and ETOPs because these data are not captured in the PRN database and these pregnancies were thus not  
34  
35 included in our cohort. This resulted in an underestimation of the number of pregnancies that were potentially  
36  
37 exposed to isotretinoin in the 30 days before or during pregnancy and the adverse fetal and neonatal  
38  
39 outcomes. Studies that estimated the teratogenic risk of isotretinoin using prospectively documented  
40  
41 isotretinoin exposed pregnancies found much higher proportions of pregnancies resulting in spontaneous  
42  
43 abortion, stillbirth or reported congenital malformations i.e. 36% (13 of the 36 fetuses)<sup>3</sup> and 26% (6 of the 23  
44  
45 fetuses)<sup>5</sup>.  
46  
47

48 Without detailed information on drug exposure preferably verified by the patient whether the drug was  
49  
50 actually taken and detailed descriptions of the diagnosed fetal outcome as well as on spontaneous abortions,  
51  
52 the teratogenic risk of isotretinoin could not be accurately estimated. With regard to the adverse fetal  
53  
54 outcomes observed in our study, we cannot exclude that they had an other aetiology than isotretinoin  
55  
56 exposure. However, the primary aim of this study was to show that adverse fetal and neonatal outcomes still  
57  
58 occur in isotretinoin exposed pregnancies, despite the implemented PPP. Unfortunately, Due to the low  
59  
60

1 number of cases it was also not possible to adjust in the statistical analysis for important confounding factors  
2 other than maternal age such as smoking, alcohol intake, previous pregnancy outcomes and exposure to other  
3 potentially teratogenic drugs. Detection bias may also have influenced the incidence and estimated risks of  
4 congenital anomalies since more detailed diagnostics might have been used in pregnancies exposed to  
5 isotretinoin compared to the unexposed pregnancies. Nevertheless, the results of our study are in line with the  
6 undisputed embryotoxicity of isotretinoin and suggestive of an increased risks of adverse fetal or neonatal  
7 events when isotretinoin is dispensed for use in the 30 days period before or during pregnancy. indicate that  
8 such events still occur despite the implemented PPP.

### 17 **Implications and future research**

18 In the Netherlands, approximately 180,000 pregnancies are reported annually.<sup>19</sup> When extrapolating the 2.2  
19 (95% CI 1.6 – 2.9) per 10,000 women potentially exposed to isotretinoin during pregnancy to a national level,  
20 there would be 29 to 52 isotretinoin-exposed pregnancies per year yielding unnecessary risks for congenital  
21 anomalies and fetal deaths. Therefore, it is in the interest of public health to implement effective PPPs and  
22 improve these measures or their compliance as much as possible to reduce isotretinoin use during pregnancy  
23 to the lowest possible level.

24 With the present study only the period 1999 to 2007 has been evaluated. The past years in the Netherlands,  
25 the PPP is communicated to healthcare professionals via product information,<sup>20</sup> national general practitioner  
26 (GP) standards on treatment of acne,<sup>21</sup> drug prescription and dispensing systems,<sup>22</sup> the website of the Dutch  
27 Medicines Evaluation Board,<sup>23</sup> and the common (national) literature on drug information.<sup>24</sup> Furthermore,  
28 research on isotretinoin use in the Netherlands and the PPP is conducted and published in (inter)national  
29 scientific medical journals.<sup>7-9 14 25-28</sup> Consequently, data after 2007 are needed to judge if attention for the  
30 isotretinoin PPP during recent years has improved the carefulness with which isotretinoin is prescribed and  
31 dispensed.

### 32 **Conclusions**

33 Although a PPP was implemented almost 15 years ago, we showed that there are still pregnancies exposed to  
34 isotretinoin in the Netherlands which could have been prevented if appropriate exclusion of pregnancy before  
35 isotretinoin initiation would have been performed. ~~Moreover, adverse fetal outcomes were reported among~~  
36 ~~these pregnancies.~~ These findings from the Netherlands add to the evidence that there is no full compliance to  
37  
38  
39  
40  
41  
42  
43  
44  
45  
46  
47  
48  
49  
50  
51  
52  
53  
54  
55  
56  
57  
58  
59  
60

1  
2  
3  
4  
5  
6  
7  
8  
9  
10  
11  
12  
13  
14  
15  
16  
17  
18  
19  
20  
21  
22  
23  
24  
25  
26  
27  
28  
29  
30  
31  
32  
33  
34  
35  
36  
37  
38  
39  
40  
41  
42  
43  
44  
45  
46  
47  
48  
49  
50  
51  
52  
53  
54  
55  
56  
57  
58  
59  
60

the isotretinoin PPP in many Western countries. Given the limited success of iPLEDGE, the question is which further measures are able to improve compliance.

For peer review only

**FIGURE LEGENDS**

**Figure 1:** Percentage of isotretinoin dispensings exceeding the maximum duration of 30 days by calendar year

**Figure 2:** Isotretinoin exposed pregnancies per 10,000 pregnancies by calendar year

—— Exposed to isotretinoin in 30 days before or during pregnancy

- - - - Exposed to isotretinoin during pregnancy

**Acknowledgements** The authors would like to thank the Netherlands Perinatal Registry for providing access to their database and contribution to the manuscript.

**Competing interests** All authors have completed the Unified Competing Interest form at [www.icmje.org/coi\\_disclosure.pdf](http://www.icmje.org/coi_disclosure.pdf) and declare that LH and RH are employees of the PHARMO Institute. This independent research institute performs financially supported studies for government and related healthcare authorities and several pharmaceutical companies. MS is leading a research group that sometimes conducts research for pharmaceutical companies. None related to the submitted work; no other relationships or activities that could appear to have influenced the submitted work.

**Details of contributors** Each author participated actively and sufficiently in this study. IZ, RR, LH, MS and BS contributed to the study design and the interpretation of the data. IZ and LH collected and analysed the data. IZ, RR, LH, RH, MS, SS and BS participated in the development and critical review of the manuscript for important intellectual content and provided final approval of the version to be published. A statement that all authors, external and internal, had full access to all of the data (including statistical reports and tables) in the study and can take responsibility for the integrity of the data and the accuracy of the data analysis.

**Ethics approval** Not applicable. The research team did not have access to medical records.

**Funding** This study was supported by the Drug Safety Unit of the Dutch Inspectorate of Health Care.

**Data sharing** No additional data available.

**Transparency** The lead author (IZ) affirms that the manuscript is an honest, accurate, and transparent account of the study being reported; that no important aspects of the study have been omitted; and that any discrepancies from the study as planned (and, if relevant, registered) have been explained.



1           **Copyright** The Corresponding Author has the right to grant on behalf of all authors and does grant on behalf of  
2  
3 all authors, a worldwide licence to the Publishers and its licensees in perpetuity, in all forms, formats and  
4  
5 media (whether known now or created in the future), to i) publish, reproduce, distribute, display and store the  
6  
7 Contribution, ii) translate the Contribution into other languages, create adaptations, reprints, include within  
8  
9 collections and create summaries, extracts and/or, abstracts of the Contribution, iii) create any other derivative  
10  
11 work(s) based on the Contribution, iv) to exploit all subsidiary rights in the Contribution, v) the inclusion of  
12  
13 electronic links from the Contribution to third party material where-ever it may be located; and, vi) licence any  
14  
15 third party to do any or all of the above.  
16  
17  
18  
19  
20  
21  
22  
23  
24  
25  
26  
27  
28  
29  
30  
31  
32  
33  
34  
35  
36  
37  
38  
39  
40  
41  
42  
43  
44  
45  
46  
47  
48  
49  
50  
51  
52  
53  
54  
55  
56  
57  
58  
59  
60

## References

1. European Medicines Agency (EMA). Annex I of the Summary information on a referral opinion following an arbitration pursuant to article 29 of directive 2001/83/EC for isotretinoin. 2003; Accessed 2 May 2013:[http://www.ema.europa.eu/docs/en\\_GB/document\\_library/Referrals\\_document/Isotretinoin\\_29/WC500010881.pdf](http://www.ema.europa.eu/docs/en_GB/document_library/Referrals_document/Isotretinoin_29/WC500010881.pdf)
2. Rosa FW. Teratogenicity of isotretinoin. *Lancet* 1983;2(8348):513.
3. Lammer EJ, Chen DT, Hoar RM, Agnish ND, Benke PJ, Braun JT, et al. Retinoic acid embryopathy. *N Engl J Med* 1985;313(14):837-41.
4. Abroms L, Maibach E, Lyon-Daniel K, Feldman SR. What is the best approach to reducing birth defects associated with isotretinoin? *PLoS Med* 2006;3(11):e483.
5. Schaefer C, Meister R, Weber-Schoendorfer C. Isotretinoin exposure and pregnancy outcome: an observational study of the Berlin Institute for Clinical Teratology and Drug Risk Assessment in Pregnancy. *Arch Gynecol Obstet* 2010;281(2):221-7.
6. Autret-Leca E, Kreft-Jais C, Elefant E, Cissoko H, Darrouzain F, Grimaldi-Bensouda L, et al. Isotretinoin exposure during pregnancy: assessment of spontaneous reports in France. *Drug Saf* 2010;33(8):659-65.
7. Crijns I, Straus S, Luteijn M, Gispens-de Wied C, Raine J, de Jong-van den Berg L. Implementation of the harmonized EU isotretinoin Pregnancy Prevention Programme: a questionnaire survey among European regulatory agencies. *Drug Saf* 2012;35(1):27-32.
8. Teichert M, Visser LE, Dufour M, Rodenburg E, Straus SM, De Smet PA, et al. Isotretinoin use and compliance with the Dutch Pregnancy Prevention Programme: a retrospective cohort study in females of reproductive age using pharmacy dispensing data. *Drug Saf* 2010;33(4):315-26.
9. Crijns HJ, van Rein N, Gispens-de Wied CC, Straus SM, de Jong-van den Berg LT. Prescriptive contraceptive use among isotretinoin users in the Netherlands in comparison with non-users: a drug utilisation study. *Pharmacoepidemiol Drug Saf* 2012;21(10):1060-6.
10. Herings RM, Bakker A, Stricker BH, Nap G. Pharmaco-morbidity linkage: a feasibility study comparing morbidity in two pharmacy based exposure cohorts. *J Epidemiol Community Health* 1992;46(2):136-40.
11. WHO Collaborating Centre for Drug Statistics Methodology. Anatomical Therapeutic Chemical (ATC) index with Defined Daily Doses (DDDs). Accessed 4 October 2013:[http://www.whocc.no/atc\\_ddd\\_index/](http://www.whocc.no/atc_ddd_index/)
12. Stichting Perinatale Registratie Nederland. *Grote Lijnen 10 jaar Perinatale Registratie Nederland*. Utrecht: Stichting Perinatale Registratie Nederland, 2011.
13. Houweling LM, Bezemer ID, Penning-van Beest FJ, Meijer WM, van Lingen RA, Herings RM. First year of life medication use and hospital admission rates: premature compared with term infants. *J Pediatr* 2013;163(1):61-6 e1.
14. Crijns I, Mantel-Teeuwisse A, Bloemberg R, Pinas E, Straus S, de Jong-van den Berg L. Healthcare professional surveys to investigate the implementation of the isotretinoin Pregnancy Prevention Programme: a descriptive study. *Expert Opin Drug Saf* 2013;12(1):29-38.
15. Berard A, Azoulay L, Koren G, Blais L, Perreault S, Oraichi D. Isotretinoin, pregnancies, abortions and birth defects: a population-based perspective. *Br J Clin Pharmacol* 2007;63(2):196-205.
16. Bensouda-Grimaldi L, Jonville-Bera AP, Mouret E, Elefant E, Dhellot H, Delmas C, et al. Isotretinoin: compliance with recommendations in childbearing women. *Ann Dermatol Venereol* 2005;132(5):415-23.
17. Pinheiro SP, Kang EM, Kim CY, Governale LA, Zhou EH, Hammad TA. Concomitant use of isotretinoin and contraceptives before and after iPledge in the United States. *Pharmacoepidemiol Drug Saf* 2013;22(12):1251-7.
18. Shin J, Cheetham TC, Wong L, Niu F, Kass E, Yoshinaga MA, et al. The impact of the iPLEDGE program on isotretinoin fetal exposure in an integrated health care system. *J Am Acad Dermatol* 2011;65(6):1117-25.
19. Stichting Perinatale Registratie Nederland. *Grote Lijnen 1999 - 2012*. Utrecht: Stichting Perinatale Registratie Nederland, 2013.
20. Roaccutane Summary of Product Characteristics. Accessed 3 January 2014:<http://db.cbg-meb.nl/IB-teksten/h10305.pdf>
21. Smeets JG GS, Bruinsma, et al. NHG-standard acne. *Huisarts wet* 2007;50:259-68.
22. Implementatie Bijzonder Kenmerk: 'Let op zwangerschapspreventieprogramma' in Z-index. 2009; Accessed 3 March 2014:<https://www.z-index.nl/g-standaard/beschrijvingen/functioneel/wijzigingen/mb/bijzondere-kenmerken/IR%20BK%20Zwangerschapspreventieprogramma%20V-1-1-1.pdf>
23. College ter Beoordeling van Geneesmiddelen / Medicines Evaluation Board (CBG/MEB). Zwangerschapspreventie programma's (ZPP). Accessed 3 March 2014:<http://www.cbg-meb.nl/CBG/nl/humane-geneesmiddelen/geneesmiddelenbew/zwangerschapspreventieprogramma/default.htm>

- 1 24. Commissie Farmaceutische Hulp. Isotretinoïne: waarschuwingen en voorzorgen. . *Farmacotherapeutisch*  
2 *kompas*. *College van Zorgverzekeringen* 2007.
- 3 25. Crijns HJ, Straus SM, Gispen-de Wied C, de Jong-van den Berg LT. Compliance with pregnancy prevention  
4 programmes of isotretinoin in Europe: a systematic review. *Br J Dermatol* 2011;164(2):238-44.
- 5 26. Fledderus S. Zwangerschapspreventie bij teratogene middelen faalt. *Medisch Contact*, 2012;48.
- 6 27. Manders KC, de Vries LC, Roumen FJ. Pregnancy after isotretinoin use. *Ned Tijdschr Geneesk*  
7 2013;157(41):A6567.
- 8 28. Crijns HJ. Teratogene middelen: zwangerschapspreventie kan beter. *Pharmaceutisch Weekblad (PW)*,  
9 2012;October.
- 10  
11  
12  
13  
14  
15  
16  
17  
18  
19  
20  
21  
22  
23  
24  
25  
26  
27  
28  
29  
30  
31  
32  
33  
34  
35  
36  
37  
38  
39  
40  
41  
42  
43  
44  
45  
46  
47  
48  
49  
50  
51  
52  
53  
54  
55  
56  
57  
58  
59  
60

For peer review only

**Figure 1:** Percentage of isotretinoin dispensings exceeding the maximum duration of 30 days by calendar year



133x101mm (300 x 300 DPI)

Review only

1  
2  
3  
4  
5  
6  
7  
8  
9  
10  
11  
12  
13  
14  
15  
16  
17  
18  
19  
20  
21  
22  
23  
24  
25  
26  
27  
28  
29  
30  
31  
32  
33  
34  
35  
36  
37  
38  
39  
40  
41  
42  
43  
44  
45  
46  
47  
48  
49  
50  
51  
52  
53  
54  
55  
56  
57  
58  
59  
60

1  
2  
3  
4  
5  
6  
7  
8  
9  
10  
11  
12  
13  
14  
15  
16  
17  
18  
19  
20  
21  
22  
23  
24  
25  
26  
27  
28  
29  
30  
31  
32  
33  
34  
35  
36  
37  
38  
39  
40  
41  
42  
43  
44  
45  
46  
47  
48  
49  
50  
51  
52  
53  
54  
55  
56  
57  
58  
59  
60

Figure 2: Isotretinoin exposed pregnancies per 10,000 pregnancies by calendar year



133x109mm (300 x 300 DPI)

Peer review only

## STROBE Statement—checklist of items that should be included in reports of observational studies

|                              | Item No | Recommendation                                                                                                                                                                             | Page |
|------------------------------|---------|--------------------------------------------------------------------------------------------------------------------------------------------------------------------------------------------|------|
| <b>Title and abstract</b>    | 1       | (a) Indicate the study's design with a commonly used term in the title or the abstract                                                                                                     | 1    |
|                              |         | (b) Provide in the abstract an informative and balanced summary of what was done and what was found                                                                                        | 3    |
| <b>Introduction</b>          |         |                                                                                                                                                                                            |      |
| Background/rationale         | 2       | Explain the scientific background and rationale for the investigation being reported                                                                                                       | 4    |
| Objectives                   | 3       | State specific objectives, including any prespecified hypotheses                                                                                                                           | 5    |
| <b>Methods</b>               |         |                                                                                                                                                                                            |      |
| Study design                 | 4       | Present key elements of study design early in the paper                                                                                                                                    | 5    |
| Setting                      | 5       | Describe the setting, locations, and relevant dates, including periods of recruitment, exposure, follow-up, and data collection                                                            | 5    |
| Participants                 | 6       | <i>Case-control study</i> —Give the eligibility criteria, and the sources and methods of case ascertainment and control selection. Give the rationale for the choice of cases and controls | 5-6  |
|                              |         | <i>Case-control study</i> —For matched studies, give matching criteria and the number of controls per case                                                                                 | NA   |
| Variables                    | 7       | Clearly define all outcomes, exposures, predictors, potential confounders, and effect modifiers. Give diagnostic criteria, if applicable                                                   | 5-78 |
| Data sources/<br>measurement | 8*      | For each variable of interest, give sources of data and details of methods of assessment (measurement). Describe comparability of assessment methods if there is more than one group       | 6-7  |
| Bias                         | 9       | Describe any efforts to address potential sources of bias                                                                                                                                  | 7    |
| Study size                   | 10      | Explain how the study size was arrived at                                                                                                                                                  | 6-7  |
| Quantitative variables       | 11      | Explain how quantitative variables were handled in the analyses. If applicable, describe which groupings were chosen and why                                                               | 6-8  |
| Statistical methods          | 12      | (a) Describe all statistical methods, including those used to control for confounding                                                                                                      | 7    |
|                              |         | (b) Describe any methods used to examine subgroups and interactions                                                                                                                        | 7    |
|                              |         | (c) Explain how missing data were addressed                                                                                                                                                | NA   |
|                              |         | (d) <i>Case-control study</i> —If applicable, explain how matching of cases and controls was addressed                                                                                     | NA   |
|                              |         | (e) Describe any sensitivity analyses                                                                                                                                                      | 6    |

Continued on next page

| <b>Results</b>           |     |                                                                                                                                                                                                              | <b>Page</b>   |
|--------------------------|-----|--------------------------------------------------------------------------------------------------------------------------------------------------------------------------------------------------------------|---------------|
| Participants             | 13* | (a) Report numbers of individuals at each stage of study—eg numbers potentially eligible, examined for eligibility, confirmed eligible, included in the study, completing follow-up, and analysed            | 7             |
|                          |     | (b) Give reasons for non-participation at each stage                                                                                                                                                         | NA            |
|                          |     | (c) Consider use of a flow diagram                                                                                                                                                                           | NA            |
| Descriptive data         | 14* | (a) Give characteristics of study participants (eg demographic, clinical, social) and information on exposures and potential confounders                                                                     | 8; (Table 1)  |
|                          |     | (b) Indicate number of participants with missing data for each variable of interest                                                                                                                          | NA            |
| Outcome data             | 15* | <i>Case-control study</i> —Report numbers in each exposure category, or summary measures of exposure                                                                                                         | 9 (Table 2)   |
| Main results             | 16  | (a) Give unadjusted estimates and, if applicable, confounder-adjusted estimates and their precision (eg, 95% confidence interval). Make clear which confounders were adjusted for and why they were included | 11; (Table 3) |
|                          |     | (b) Report category boundaries when continuous variables were categorized                                                                                                                                    | NA            |
|                          |     | (c) If relevant, consider translating estimates of relative risk into absolute risk for a meaningful time period                                                                                             | NA            |
| Other analyses           | 17  | Report other analyses done—eg analyses of subgroups and interactions, and sensitivity analyses                                                                                                               | 11;(Table 3)  |
| <b>Discussion</b>        |     |                                                                                                                                                                                                              |               |
| Key results              | 18  | Summarise key results with reference to study objectives                                                                                                                                                     | 12-13         |
| Limitations              | 19  | Discuss limitations of the study, taking into account sources of potential bias or imprecision. Discuss both direction and magnitude of any potential bias                                                   | 14            |
| Interpretation           | 20  | Give a cautious overall interpretation of results considering objectives, limitations, multiplicity of analyses, results from similar studies, and other relevant evidence                                   | 13-14         |
| Generalisability         | 21  | Discuss the generalisability (external validity) of the study results                                                                                                                                        | 15            |
| <b>Other information</b> |     |                                                                                                                                                                                                              |               |
| Funding                  | 22  | Give the source of funding and the role of the funders for the present study and, if applicable, for the original study on which the present article is based                                                | 16            |

\*Give information separately for cases and controls in case-control studies and, if applicable, for exposed and unexposed groups in cohort and cross-sectional studies.

**Note:** An Explanation and Elaboration article discusses each checklist item and gives methodological background and published examples of transparent reporting. The STROBE checklist is best used in conjunction with this article (freely available on the Web sites of PLoS Medicine at <http://www.plosmedicine.org/>, Annals of Internal Medicine at <http://www.annals.org/>, and Epidemiology at <http://www.epidem.com/>). Information on the STROBE Initiative is available at [www.strobe-statement.org](http://www.strobe-statement.org).
